# Supplementary material for: AtGAP1 Promotes the Resistance to Pseudomonas syringae pv. tomato DC3000 by Regulating Cell-Wall Thickness and Stomatal Aperture in Arabidopsis
Source: Int J Mol Sci. 2022 Jul 7;23(14):7540. doi: 10.3390/ijms23147540 (PMC9323218; doi:10.3390/ijms23147540)
Supplement: Supplementary file 1 [file ijms-23-07540-s001.zip › Supplementary Tables 2022-6-29.xlsx]

## Sheet: line A_Day0_vs_Day3
Table S1. List of differentially expressed proteins in AtGAP1-overexpressor line A between day 0 and day 3 of Pst DC3000 inoculation.
Accession	Description	Abundance Ratio: (3dpi-AtGAP1 overexpressor line A) / (0dpi-AtGAP1 overexpressor line A)	Abundance Ratio Adj. P-Value: (3dpi-AtGAP1 overexpressor line A) / (0dpi-AtGAP1 overexpressor line A)	Direction of change
AT5G26742.2	DEAD box RNA helicase (RH3)	0.332	1.94098e-06	Down
AT5G22440.2	Ribosomal protein L1p/L10e family	0.01	1.05127e-16	Down
AT5G10470.2	kinesin like protein for actin based chloroplast movement 1	0.1	9.97569e-11	Down
AT4G31480.2	Coatomer, beta subunit	0.31	0.00254646	Down
ATCG00350.1	Photosystem I, PsaA/PsaB protein	0.288	3.52601e-05	Down
AT5G20990.1	molybdopterin biosynthesis CNX1 protein / molybdenum cofactor biosynthesis enzyme CNX1 (CNX1)	0.01	1.05127e-16	Down
AT2G04842.1	threonyl-tRNA synthetase, putative / threonine--tRNA ligase, putative	0.01	1.05127e-16	Down
AT3G15610.1	Transducin/WD40 repeat-like superfamily protein	0.01	1.05127e-16	Down
AT1G58290.1	Glutamyl-tRNA reductase family protein	0.01	1.05127e-16	Down
AT1G80410.2	tetratricopeptide repeat (TPR)-containing protein	0.01	1.05127e-16	Down
AT3G51880.1	high mobility group B1	0.013	1.05127e-16	Down
AT5G49030.3	tRNA synthetase class I (I, L, M and V) family protein	0.01	1.05127e-16	Down
AT2G42680.1	multiprotein bridging factor 1A	0.129	3.65637e-12	Down
AT2G33590.1	NAD(P)-binding Rossmann-fold superfamily protein	0.01	1.05127e-16	Down
AT4G21960.1	Peroxidase superfamily protein	0.01	1.05127e-16	Down
AT3G48860.2	unknown protein; INVOLVED IN: biological_process unknown; LOCATED IN: plasma membrane; EXPRESSED IN: 22 plant structures; EXPRESSED DURING: 13 growth stages; BEST Arabidopsis thaliana protein match is: unknown protein (TAIR:AT5G23700.1); Has 12429 Blast hits to 9751 proteins in 897 species: Archae - 180; Bacteria - 1190; Metazoa - 6552; Fungi - 1361; Plants - 886; Viruses - 50; Other Eukaryotes -…	0.01	1.05127e-16	Down
AT2G37790.1	NAD(P)-linked oxidoreductase superfamily protein	0.089	1.05127e-16	Down
AT1G51560.1	Pyridoxamine 5'-phosphate oxidase family protein	0.01	1.05127e-16	Down
AT3G19480.1	D-3-phosphoglycerate dehydrogenase	0.01	1.05127e-16	Down
AT1G15950.1	cinnamoyl coa reductase 1	0.085	2.30031e-15	Down
AT5G47930.1	Zinc-binding ribosomal protein family protein	0.091	1.05127e-16	Down
AT5G08450.3	FUNCTIONS IN: molecular_function unknown; INVOLVED IN: biological_process unknown; LOCATED IN: cellular_component unknown; EXPRESSED IN: 25 plant structures; EXPRESSED DURING: 15 growth stages; CONTAINS InterPro DOMAIN/s: Histone deacetylation protein Rxt3 (InterPro:IPR013951); Has 34444 Blast hits to 20801 proteins in 1175 species: Archae - 64; Bacteria - 2390; Metazoa - 15568; Fungi - 3729; Pla…	0.01	1.05127e-16	Down
AT3G21200.1	proton gradient regulation 7	0.01	1.05127e-16	Down
AT3G46040.1	ribosomal protein S15A D	0.272	1.35684e-05	Down
AT2G21160.1	Translocon-associated protein (TRAP), alpha subunit	0.108	1.13134e-14	Down
AT1G75030.1	thaumatin-like protein 3	0.01	1.05127e-16	Down
AT2G46520.1	cellular apoptosis susceptibility protein, putative / importin-alpha re-exporter, putative	0.01	1.05127e-16	Down
AT4G17050.1	ureidoglycine aminohydrolase	0.01	1.05127e-16	Down
AT1G75460.1	ATP-dependent protease La (LON) domain protein	0.079	1.29303e-12	Down
AT1G18450.1	actin-related protein 4	0.101	2.30031e-15	Down
AT5G51840.1	unknown protein; Has 30201 Blast hits to 17322 proteins in 780 species: Archae - 12; Bacteria - 1396; Metazoa - 17338; Fungi - 3422; Plants - 5037; Viruses - 0; Other Eukaryotes - 2996 (source: NCBI BLink).	0.01	1.05127e-16	Down
AT3G56460.1	GroES-like zinc-binding alcohol dehydrogenase family protein	0.01	1.05127e-16	Down
AT2G36230.1	Aldolase-type TIM barrel family protein	0.01	1.05127e-16	Down
AT1G47500.1	RNA-binding protein 47C'	0.237	9.94386e-10	Down
AT2G29560.1	cytosolic enolase	0.088	1.05127e-16	Down
AT5G25070.1	unknown protein; FUNCTIONS IN: molecular_function unknown; INVOLVED IN: biological_process unknown; LOCATED IN: cellular_component unknown; EXPRESSED IN: 23 plant structures; EXPRESSED DURING: 13 growth stages; Has 1807 Blast hits to 1807 proteins in 277 species: Archae - 0; Bacteria - 0; Metazoa - 736; Fungi - 347; Plants - 385; Viruses - 0; Other Eukaryotes - 339 (source: NCBI BLink).	0.083	1.05127e-16	Down
AT1G11660.1	heat shock protein 70 (Hsp 70) family protein	0.01	1.05127e-16	Down
AT1G04810.1	26S proteasome regulatory complex, non-ATPase subcomplex, Rpn2/Psmd1 subunit	0.01	1.05127e-16	Down
AT4G31180.2	Class II aminoacyl-tRNA and biotin synthetases superfamily protein	0.01	1.05127e-16	Down
AT3G04650.1	FAD/NAD(P)-binding oxidoreductase family protein	0.08	1.17384e-12	Down
AT4G39980.1	3-deoxy-D-arabino-heptulosonate 7-phosphate synthase 1	0.01	1.05127e-16	Down
AT5G01530.1	light harvesting complex photosystem II	0.333	2.10692e-05	Down
AT1G28060.1	Pre-mRNA-splicing factor 3	0.01	1.05127e-16	Down
AT2G34430.1	light-harvesting chlorophyll-protein complex II subunit B1	0.065	1.05127e-16	Down
AT4G24270.2	EMBRYO DEFECTIVE 140	0.098	4.56267e-15	Down
AT4G34030.1	3-methylcrotonyl-CoA carboxylase	0.174	3.63267e-06	Down
AT3G07100.1	Sec23/Sec24 protein transport family protein	0.096	1.05127e-16	Down
AT5G52650.1	RNA binding Plectin/S10 domain-containing protein	0.14	3.18104e-12	Down
AT5G46800.1	Mitochondrial substrate carrier family protein	0.01	1.05127e-16	Down
AT3G18860.1	transducin family protein / WD-40 repeat family protein	0.01	1.05127e-16	Down
AT5G61970.1	signal recognition particle-related / SRP-related	0.01	1.05127e-16	Down
AT1G53645.1	hydroxyproline-rich glycoprotein family protein	0.095	1.23922e-13	Down
AT2G26730.1	Leucine-rich repeat protein kinase family protein	0.01	1.05127e-16	Down
AT1G09620.1	ATP binding;leucine-tRNA ligases;aminoacyl-tRNA ligases;nucleotide binding;ATP binding;aminoacyl-tRNA ligases	0.109	4.55997e-11	Down
AT3G63160.1	FUNCTIONS IN: molecular_function unknown; INVOLVED IN: biological_process unknown; LOCATED IN: chloroplast outer membrane, thylakoid, chloroplast thylakoid membrane, chloroplast, chloroplast envelope; EXPRESSED IN: 21 plant structures; EXPRESSED DURING: 13 growth stages; BEST Arabidopsis thaliana protein match is: outer envelope membrane protein 7 (TAIR:AT3G52420.1); Has 26 Blast hits to 26 prote…	0.01	1.05127e-16	Down
AT5G39590.1	TLD-domain containing nucleolar protein	0.125	7.48404e-09	Down
AT1G64640.1	early nodulin-like protein 8	0.01	1.05127e-16	Down
AT1G73600.2	S-adenosyl-L-methionine-dependent methyltransferases superfamily protein	0.01	1.05127e-16	Down
AT1G21080.3	DNAJ heat shock N-terminal domain-containing protein	0.01	1.05127e-16	Down
AT2G31750.1	UDP-glucosyl transferase 74D1	0.01	1.05127e-16	Down
AT3G57320.1	unknown protein; Has 30 Blast hits to 30 proteins in 13 species: Archae - 0; Bacteria - 0; Metazoa - 2; Fungi - 0; Plants - 28; Viruses - 0; Other Eukaryotes - 0 (source: NCBI BLink).	0.096	7.67993e-12	Down
AT1G45230.1	Protein of unknown function (DUF3223)	0.01	1.05127e-16	Down
AT2G35780.1	serine carboxypeptidase-like 26	0.01	1.05127e-16	Down
AT4G05090.1	Inositol monophosphatase family protein	0.065	1.05127e-16	Down
AT1G20580.1	Small nuclear ribonucleoprotein family protein	0.01	1.05127e-16	Down
AT1G26750.1	unknown protein; Has 44 Blast hits to 44 proteins in 16 species: Archae - 0; Bacteria - 0; Metazoa - 0; Fungi - 0; Plants - 44; Viruses - 0; Other Eukaryotes - 0 (source: NCBI BLink).	0.01	1.05127e-16	Down
AT2G28900.1	outer plastid envelope protein 16-1	0.01	1.05127e-16	Down
AT1G54060.1	6B-interacting protein 1-like 1	0.01	1.05127e-16	Down
AT2G20230.1	Tetraspanin family protein	0.01	1.05127e-16	Down
AT3G21790.1	UDP-Glycosyltransferase superfamily protein	0.01	1.05127e-16	Down
AT5G16780.1	SART-1 family	0.01	1.05127e-16	Down
AT1G55080.1	MED9; BEST Arabidopsis thaliana protein match is: unknown protein (TAIR:AT1G29580.1); Has 67203 Blast hits to 25757 proteins in 1293 species: Archae - 12; Bacteria - 4374; Metazoa - 24340; Fungi - 7940; Plants - 5927; Viruses - 273; Other Eukaryotes - 24337 (source: NCBI BLink).	0.098	1.23922e-13	Down
AT1G48570.1	zinc finger (Ran-binding) family protein	0.01	1.05127e-16	Down
AT2G24820.1	translocon at the inner envelope membrane of chloroplasts 55-II	0.01	1.05127e-16	Down
AT5G08650.1	Small GTP-binding protein	0.01	1.05127e-16	Down
ATCG00020.1	photosystem II reaction center protein A	0.01	1.05127e-16	Down
AT2G05620.1	proton gradient regulation 5	0.01	1.05127e-16	Down
AT5G34850.1	purple acid phosphatase 26	0.01	1.05127e-16	Down
AT3G20120.1	cytochrome P450, family 705, subfamily A, polypeptide 21	0.01	1.05127e-16	Down
AT5G67150.1	HXXXD-type acyl-transferase family protein	0.092	5.5036e-11	Down
AT4G13730.1	Ypt/Rab-GAP domain of gyp1p superfamily protein	0.01	1.05127e-16	Down
AT3G09250.2	Nuclear transport factor 2 (NTF2) family protein	0.01	1.05127e-16	Down
AT5G16715.1	ATP binding;valine-tRNA ligases;aminoacyl-tRNA ligases;nucleotide binding;ATP binding;aminoacyl-tRNA ligases	0.01	1.05127e-16	Down
AT1G60550.1	enoyl-CoA hydratase/isomerase D	0.01	1.05127e-16	Down
AT1G35580.2	cytosolic invertase 1	0.01	1.05127e-16	Down
AT5G19180.1	E1 C-terminal related 1	0.01	1.05127e-16	Down
AT5G47110.1	Chlorophyll A-B binding family protein	0.01	1.05127e-16	Down
AT1G02280.2	translocon at the outer envelope membrane of chloroplasts 33	0.01	1.05127e-16	Down
AT3G13490.1	Lysyl-tRNA synthetase, class II	0.01	1.05127e-16	Down
AT4G23040.1	Ubiquitin-like superfamily protein	0.01	1.05127e-16	Down
AT5G56140.1	RNA-binding KH domain-containing protein	0.228	0.000107732	Down
AT4G33030.1	sulfoquinovosyldiacylglycerol 1	0.01	1.05127e-16	Down
AT3G14240.1	Subtilase family protein	0.01	1.05127e-16	Down
AT4G35970.1	ascorbate peroxidase 5	0.094	2.29669e-12	Down
AT5G10460.1	Haloacid dehalogenase-like hydrolase (HAD) superfamily protein	0.01	1.05127e-16	Down
AT1G33330.1	Class I peptide chain release factor	0.01	1.05127e-16	Down
AT2G03510.1	SPFH/Band 7/PHB domain-containing membrane-associated protein family	0.01	1.05127e-16	Down
AT2G39730.2	rubisco activase	16.764	1.05127e-16	Up
AT3G16420.2	PYK10-binding protein 1	3.134	1.14102e-05	Up
AT3G16470.1	Mannose-binding lectin superfamily protein	5.043	3.62362e-11	Up
AT1G19570.1	dehydroascorbate reductase	5.033	3.83154e-11	Up
AT4G08870.1	Arginase/deacetylase superfamily protein	6.053	9.16452e-14	Up
AT4G23600.1	Tyrosine transaminase family protein	6.735	2.30031e-15	Up
AT1G02930.1	glutathione S-transferase 6	3.075	1.71514e-05	Up
AT1G52400.1	beta glucosidase 18	3.345	6.75082e-06	Up
AT1G02920.1	glutathione S-transferase 7	3.132	1.423e-05	Up
AT3G57260.1	beta-1,3-glucanase 2	3.667	3.35341e-07	Up
AT1G45145.1	thioredoxin H-type 5	5.795	9.08246e-13	Up
AT4G17470.2	alpha/beta-Hydrolases superfamily protein	3.736	4.43049e-07	Up
AT5G24770.1	vegetative storage protein 2	100	1.05127e-16	Up
AT5G59310.1	lipid transfer protein 4	3.54	1.65125e-06	Up
AT1G52040.1	myrosinase-binding protein 1	6.567	4.01217e-11	Up
AT3G52750.1	Tubulin/FtsZ family protein	100	1.05127e-16	Up
AT1G16030.1	heat shock protein 70B	8.363	2.5369e-11	Up
AT5G64120.1	Peroxidase superfamily protein	3.062	8.4393e-05	Up
AT1G54630.1	acyl carrier protein 3	7.155	9.59219e-14	Up
AT2G06050.1	oxophytodienoate-reductase 3	4.264	4.27756e-08	Up
AT1G52030.1	myrosinase-binding protein 2	3.802	0.00163181	Up
AT3G28930.1	AIG2-like (avirulence induced gene) family protein	4.56	1.87757e-07	Up
AT1G73260.1	kunitz trypsin inhibitor 1	100	1.05127e-16	Up
AT1G60950.1	2Fe-2S ferredoxin-like superfamily protein	100	1.05127e-16	Up
AT4G00660.1	RNAhelicase-like 8	8.767	2.38197e-10	Up
AT3G02230.1	reversibly glycosylated polypeptide 1	4.382	0.000319304	Up
AT5G06870.1	polygalacturonase inhibiting protein 2	3.972	1.13024e-06	Up
ATCG00680.1	photosystem II reaction center protein B	5.142	3.07169e-07	Up
AT2G23600.1	acetone-cyanohydrin lyase	9.424	2.41009e-13	Up
AT4G01370.1	MAP kinase 4	11.17	5.09165e-10	Up
AT1G19870.1	IQ-domain 32	100	1.05127e-16	Up
AT4G17890.1	ARF-GAP domain 8	100	1.05127e-16	Up
AT4G37520.1	Peroxidase superfamily protein	100	1.05127e-16	Up
AT1G22410.1	Class-II DAHP synthetase family protein	100	1.05127e-16	Up
AT2G27510.1	ferredoxin 3	3.645	0.000148831	Up
AT4G21830.1	methionine sulfoxide reductase B7	3.547	1.60965e-05	Up
AT5G66550.1	Maf-like protein	100	1.05127e-16	Up
AT4G01610.1	Cysteine proteinases superfamily protein	100	1.05127e-16	Up
AT1G26570.1	UDP-glucose dehydrogenase 1	100	1.05127e-16	Up
AT1G09010.1	glycoside hydrolase family 2 protein	100	1.05127e-16	Up
AT5G05590.1	phosphoribosylanthranilate isomerase 2	100	1.05127e-16	Up
AT5G09440.1	EXORDIUM like 4	100	1.05127e-16	Up
AT3G55010.1	phosphoribosylformylglycinamidine cyclo-ligase, chloroplast / phosphoribosyl-aminoimidazole synthetase / AIR synthase (PUR5)	3.22	0.00112503	Up
AT5G03650.1	starch branching enzyme 2.2	10.038	4.89631e-09	Up
AT5G42190.1	E3 ubiquitin ligase SCF complex subunit SKP1/ASK1 family protein	100	1.05127e-16	Up
AT1G71730.1	unknown protein; Has 52 Blast hits to 52 proteins in 24 species: Archae - 0; Bacteria - 0; Metazoa - 4; Fungi - 0; Plants - 41; Viruses - 0; Other Eukaryotes - 7 (source: NCBI BLink).	100	1.05127e-16	Up
AT4G35460.1	NADPH-dependent thioredoxin reductase B	8.878	4.07105e-12	Up
AT5G64260.1	EXORDIUM like 2	100	1.05127e-16	Up
AT1G44820.1	Peptidase M20/M25/M40 family protein	13.426	9.50034e-12	Up
AT1G31230.1	aspartate kinase-homoserine dehydrogenase i	6.998	2.37897e-09	Up
AT1G15750.1	Transducin family protein / WD-40 repeat family protein	100	1.05127e-16	Up
AT4G32640.2	Sec23/Sec24 protein transport family protein	100	1.05127e-16	Up
AT2G22780.1	peroxisomal NAD-malate dehydrogenase 1	100	1.05127e-16	Up
AT1G14250.1	GDA1/CD39 nucleoside phosphatase family protein	100	1.05127e-16	Up
AT5G42390.1	Insulinase (Peptidase family M16) family protein	7.927	1.02446e-11	Up
AT4G23680.1	Polyketide cyclase/dehydrase and lipid transport superfamily protein	100	1.05127e-16	Up
AT2G42790.1	citrate synthase 3	100	1.05127e-16	Up
AT3G27310.1	plant UBX domain-containing protein 1	100	1.05127e-16	Up
AT1G19670.1	chlorophyllase 1	100	1.05127e-16	Up
AT1G44790.1	ChaC-like family protein	12.619	1.05127e-16	Up
AT1G60780.1	Clathrin adaptor complexes medium subunit family protein	11.372	1.08448e-10	Up
AT5G64370.1	beta-ureidopropionase	100	1.05127e-16	Up
AT3G26340.1	N-terminal nucleophile aminohydrolases (Ntn hydrolases) superfamily protein	100	1.05127e-16	Up
AT4G37925.1	subunit NDH-M of NAD(P)H:plastoquinone dehydrogenase complex	7.618	8.24625e-08	Up
AT2G35840.1	Sucrose-6F-phosphate phosphohydrolase family protein	11.347	6.82993e-15	Up
AT1G15120.2	Ubiquinol-cytochrome C reductase hinge protein	100	1.05127e-16	Up
AT5G55200.1	Co-chaperone GrpE family protein	100	1.05127e-16	Up
AT4G29830.1	Transducin/WD40 repeat-like superfamily protein	5.972	2.0007e-12	Up
AT5G08080.3	syntaxin of plants 132	100	1.05127e-16	Up
AT5G54940.2	Translation initiation factor SUI1 family protein	100	1.05127e-16	Up
AT2G41410.1	Calcium-binding EF-hand family protein	100	1.05127e-16	Up
AT3G48330.1	protein-l-isoaspartate methyltransferase 1	100	1.05127e-16	Up
AT5G08000.1	glucan endo-1,3-beta-glucosidase-like protein 3	100	1.05127e-16	Up
AT5G47480.1	RGPR-related	100	1.05127e-16	Up
AT2G43820.1	UDP-glucosyltransferase 74F2	9.203	2.80143e-12	Up
AT2G42500.1	protein phosphatase 2A-3	100	1.05127e-16	Up
AT5G25610.1	BURP domain-containing protein	100	1.05127e-16	Up
AT1G21250.1	cell wall-associated kinase	100	1.05127e-16	Up
AT1G01160.2	GRF1-interacting factor 2	100	1.05127e-16	Up
AT2G43760.1	molybdopterin biosynthesis MoaE family protein	100	1.05127e-16	Up
AT1G12050.1	fumarylacetoacetase, putative	3.086	0.00224812	Up
AT1G74880.1	NAD(P)H:plastoquinone dehydrogenase complex subunit O	5.593	3.56806e-05	Up
AT2G27920.1	serine carboxypeptidase-like 51	100	1.05127e-16	Up
AT3G50370.1	unknown protein; FUNCTIONS IN: molecular_function unknown; INVOLVED IN: biological_process unknown; LOCATED IN: cellular_component unknown; EXPRESSED IN: 26 plant structures; EXPRESSED DURING: 15 growth stages; Has 27734 Blast hits to 16708 proteins in 1259 species: Archae - 81; Bacteria - 3434; Metazoa - 10876; Fungi - 2514; Plants - 987; Viruses - 212; Other Eukaryotes - 9630 (source: NCBI BLin…	10.757	3.48645e-10	Up
AT2G47850.3	Zinc finger C-x8-C-x5-C-x3-H type family protein	100	1.05127e-16	Up
AT1G61690.1	phosphoinositide binding	100	1.05127e-16	Up
AT4G25890.1	60S acidic ribosomal protein family	100	1.05127e-16	Up
AT2G21370.1	xylulose kinase-1	100	1.05127e-16	Up
AT4G30480.2	Tetratricopeptide repeat (TPR)-like superfamily protein	3.57	0.000216043	Up
AT2G44525.1	Protein of unknown function (DUF498/DUF598)	100	1.05127e-16	Up
AT3G25690.2	Hydroxyproline-rich glycoprotein family protein	22.37	1.05127e-16	Up
AT5G06410.1	DNAJ heat shock N-terminal domain-containing protein	100	1.05127e-16	Up
AT2G02990.1	ribonuclease 1	100	1.05127e-16	Up
AT2G24850.1	tyrosine aminotransferase 3	100	1.05127e-16	Up
AT1G67865.1	unknown protein; BEST Arabidopsis thaliana protein match is: unknown protein (TAIR:AT1G67860.1); Has 13 Blast hits to 13 proteins in 2 species: Archae - 0; Bacteria - 0; Metazoa - 0; Fungi - 0; Plants - 13; Viruses - 0; Other Eukaryotes - 0 (source: NCBI BLink).	100	1.05127e-16	Up
AT1G70810.1	Calcium-dependent lipid-binding (CaLB domain) family protein	100	1.05127e-16	Up
AT3G06860.1	multifunctional protein 2	10.512	2.4788e-14	Up
AT1G25350.2	glutamine-tRNA ligase, putative / glutaminyl-tRNA synthetase, putative / GlnRS, putative	100	1.05127e-16	Up
AT3G11200.1	alfin-like 2	5.926	1.54885e-05	Up
AT3G09260.1	Glycosyl hydrolase superfamily protein	11.275	4.56267e-15	Up
AT1G80050.1	adenine phosphoribosyl transferase 2	8.53	3.55295e-12	Up
AT3G09940.1	monodehydroascorbate reductase	100	1.05127e-16	Up
AT3G52400.1	syntaxin of plants 122	100	1.05127e-16	Up
AT1G71230.1	COP9-signalosome 5B	3.407	0.000559211	Up
AT1G64500.1	Glutaredoxin family protein	100	1.05127e-16	Up
AT4G34270.1	TIP41-like family protein	100	1.05127e-16	Up
AT2G15860.1	unknown protein; FUNCTIONS IN: molecular_function unknown; INVOLVED IN: biological_process unknown; LOCATED IN: cellular_component unknown; EXPRESSED IN: 24 plant structures; EXPRESSED DURING: 13 growth stages; Has 30201 Blast hits to 17322 proteins in 780 species: Archae - 12; Bacteria - 1396; Metazoa - 17338; Fungi - 3422; Plants - 5037; Viruses - 0; Other Eukaryotes - 2996 (source: NCBI BLink).	100	1.05127e-16	Up
AT2G43510.1	trypsin inhibitor protein 1	3.01	0.00251737	Up
AT5G66470.1	RNA binding;GTP binding	6.051	1.66722e-08	Up
AT1G21640.2	NAD kinase 2	100	1.05127e-16	Up
AT5G50210.1	quinolinate synthase	100	1.05127e-16	Up
AT5G08610.1	P-loop containing nucleoside triphosphate hydrolases superfamily protein	100	1.05127e-16	Up
AT4G21160.2	Calcium-dependent ARF-type GTPase activating protein family	100	1.05127e-16	Up
AT1G58280.2	Phosphoglycerate mutase family protein	100	1.05127e-16	Up
AT1G76890.2	Duplicated homeodomain-like superfamily protein	15.07	1.05127e-16	Up
AT5G13520.1	peptidase M1 family protein	100	1.05127e-16	Up
AT1G26390.1	FAD-binding Berberine family protein	100	1.05127e-16	Up
AT5G53120.6	spermidine synthase 3	100	1.05127e-16	Up
AT4G31360.1	selenium binding	100	1.05127e-16	Up
AT4G04910.1	AAA-type ATPase family protein	100	1.05127e-16	Up
AT4G30220.2	small nuclear ribonucleoprotein F	100	1.05127e-16	Up
AT4G20930.1	6-phosphogluconate dehydrogenase family protein	11.251	2.30031e-15	Up
AT2G16710.3	Iron-sulphur cluster biosynthesis family protein	100	1.05127e-16	Up
AT1G32580.1	plastid developmental protein DAG, putative	100	1.05127e-16	Up
AT3G22600.1	Bifunctional inhibitor/lipid-transfer protein/seed storage 2S albumin superfamily protein	100	1.05127e-16	Up
AT5G24530.1	2-oxoglutarate (2OG) and Fe(II)-dependent oxygenase superfamily protein	100	1.05127e-16	Up
AT1G61620.1	phosphoinositide binding	100	1.05127e-16	Up
AT2G25430.1	epsin N-terminal homology (ENTH) domain-containing protein / clathrin assembly protein-related	100	1.05127e-16	Up
AT1G69840.7	SPFH/Band 7/PHB domain-containing membrane-associated protein family	100	1.05127e-16	Up
AT3G50520.1	Phosphoglycerate mutase family protein	100	1.05127e-16	Up
AT1G19140.2	FUNCTIONS IN: molecular_function unknown; INVOLVED IN: ubiquinone biosynthetic process; LOCATED IN: mitochondrion; EXPRESSED IN: 24 plant structures; EXPRESSED DURING: 15 growth stages; CONTAINS InterPro DOMAIN/s: COQ9 (InterPro:IPR013718), Ubiquinone biosynthesis protein COQ9 (InterPro:IPR012762); Has 35333 Blast hits to 34131 proteins in 2444 species: Archae - 798; Bacteria - 22429; Metazoa - 9…	100	1.05127e-16	Up
AT3G48710.1	DEK domain-containing chromatin associated protein	100	1.05127e-16	Up
AT5G24420.1	6-phosphogluconolactonase 5	100	1.05127e-16	Up
AT1G48160.1	signal recognition particle 19 kDa protein, putative / SRP19, putative	100	1.05127e-16	Up
AT1G16730.1	unknown protein 6	100	1.05127e-16	Up
AT5G10950.1	Tudor/PWWP/MBT superfamily protein	100	1.05127e-16	Up
AT1G07440.1	NAD(P)-binding Rossmann-fold superfamily protein	11.655	1.05127e-16	Up
AT4G13550.1	triglyceride lipases;triglyceride lipases	100	1.05127e-16	Up
AT5G60490.1	FASCICLIN-like arabinogalactan-protein 12	4.848	5.15846e-07	Up
AT3G47340.1	glutamine-dependent asparagine synthase 1	100	1.05127e-16	Up
AT3G01090.2	SNF1 kinase homolog 10	100	1.05127e-16	Up
AT3G09300.1	OSBP(oxysterol binding protein)-related protein 3B	100	1.05127e-16	Up
AT3G12610.1	Leucine-rich repeat (LRR) family protein	100	1.05127e-16	Up
AT5G38890.1	Nucleic acid-binding, OB-fold-like protein	100	1.05127e-16	Up
AT1G13990.3	unknown protein; FUNCTIONS IN: molecular_function unknown; INVOLVED IN: biological_process unknown; LOCATED IN: chloroplast; EXPRESSED IN: 23 plant structures; EXPRESSED DURING: 13 growth stages; CONTAINS InterPro DOMAIN/s: Protein of unknown function DUF3110 (InterPro:IPR021503); Has 4 Blast hits to 4 proteins in 1 species: Archae - 0; Bacteria - 0; Metazoa - 0; Fungi - 0; Plants - 4; Viruses - …	100	1.05127e-16	Up
AT3G17040.1	high chlorophyll fluorescent 107	100	1.05127e-16	Up
AT2G47250.1	RNA helicase family protein	100	1.05127e-16	Up
AT4G13180.1	NAD(P)-binding Rossmann-fold superfamily protein	100	1.05127e-16	Up
AT2G28390.1	SAND family protein	100	1.05127e-16	Up
AT1G63310.1	unknown protein; BEST Arabidopsis thaliana protein match is: unknown protein (TAIR:AT2G20362.1); Has 78 Blast hits to 77 proteins in 11 species: Archae - 0; Bacteria - 0; Metazoa - 0; Fungi - 0; Plants - 78; Viruses - 0; Other Eukaryotes - 0 (source: NCBI BLink).	100	1.05127e-16	Up
AT1G59990.1	DEA(D/H)-box RNA helicase family protein	100	1.05127e-16	Up
AT2G46600.1	Calcium-binding EF-hand family protein	100	1.05127e-16	Up
AT4G14320.2	Zinc-binding ribosomal protein family protein	20.459	2.30031e-15	Up
AT1G66130.1	NAD(P)-binding Rossmann-fold superfamily protein	10.577	1.13134e-14	Up
AT3G53180.1	glutamate-ammonia ligases;catalytics;glutamate-ammonia ligases	16.436	1.05127e-16	Up
AT5G58390.1	Peroxidase superfamily protein	100	1.05127e-16	Up
AT4G13860.1	RNA-binding (RRM/RBD/RNP motifs) family protein	8.718	2.80143e-12	Up
AT2G44065.2	Ribosomal protein L2 family	100	1.05127e-16	Up
AT3G19910.1	RING/U-box superfamily protein	100	1.05127e-16	Up
AT1G10310.1	NAD(P)-binding Rossmann-fold superfamily protein	100	1.05127e-16	Up
AT3G10740.1	alpha-L-arabinofuranosidase 1	100	1.05127e-16	Up
AT4G18060.1	SH3 domain-containing protein	100	1.05127e-16	Up
AT1G65700.1	Small nuclear ribonucleoprotein family protein	11.122	1.45204e-10	Up
AT1G17140.2	interactor of constitutive active rops 1	8.463	1.02446e-11	Up

## Sheet: line C_Day0_vs_Day3
Table S2. List of differentially expressed proteins in AtGAP1-overexpressor line C between day 0 and day 3 of Pst DC3000 inoculation.
Accession	Description	Abundance Ratio: (3dpi-AtGAP1 overexpressor line C) / (0dpi-AtGAP1 overexpressor line C)	Abundance Ratio Adj. P-Value: (3dpi-AtGAP1 overexpressor line C) / (0dpi-AtGAP1 overexpressor line C)	Direction of change
AT5G23860.2	tubulin beta 8	0.01	1.03758e-16	Down
AT3G12110.1	actin-11	0.01	1.03758e-16	Down
AT5G54190.1	protochlorophyllide oxidoreductase A	0.109	8.97205e-15	Down
AT2G42100.1	Actin-like ATPase superfamily protein	0.01	1.03758e-16	Down
AT5G15490.1	UDP-glucose 6-dehydrogenase family protein	0.109	2.28009e-15	Down
AT5G10470.2	kinesin like protein for actin based chloroplast movement 1	0.207	5.87545e-08	Down
AT1G48470.1	glutamine synthetase 1;5	0.094	1.03758e-16	Down
AT5G20990.1	molybdopterin biosynthesis CNX1 protein / molybdenum cofactor biosynthesis enzyme CNX1 (CNX1)	0.01	1.03758e-16	Down
ATCG00680.1	photosystem II reaction center protein B	0.121	2.84649e-14	Down
AT1G16810.1	unknown protein; CONTAINS InterPro DOMAIN/s: Protein of unknown function DUF1754, eukaryotic (InterPro:IPR013865); Has 395 Blast hits to 394 proteins in 162 species: Archae - 0; Bacteria - 0; Metazoa - 181; Fungi - 91; Plants - 65; Viruses - 0; Other Eukaryotes - 58 (source: NCBI BLink).	0.01	1.03758e-16	Down
AT1G58290.1	Glutamyl-tRNA reductase family protein	0.01	1.03758e-16	Down
AT4G00490.1	beta-amylase 2	0.01	1.03758e-16	Down
AT5G49030.3	tRNA synthetase class I (I, L, M and V) family protein	0.102	1.03758e-16	Down
AT2G42680.1	multiprotein bridging factor 1A	0.01	1.03758e-16	Down
AT5G03650.1	starch branching enzyme 2.2	0.01	1.03758e-16	Down
AT5G42190.1	E3 ubiquitin ligase SCF complex subunit SKP1/ASK1 family protein	0.097	2.28009e-15	Down
AT2G37790.1	NAD(P)-linked oxidoreductase superfamily protein	0.109	1.03758e-16	Down
AT1G51560.1	Pyridoxamine 5'-phosphate oxidase family protein	0.092	1.03758e-16	Down
AT3G45190.1	SIT4 phosphatase-associated family protein	0.259	1.65457e-06	Down
AT5G47930.1	Zinc-binding ribosomal protein family protein	0.01	1.03758e-16	Down
AT5G08450.3	FUNCTIONS IN: molecular_function unknown; INVOLVED IN: biological_process unknown; LOCATED IN: cellular_component unknown; EXPRESSED IN: 25 plant structures; EXPRESSED DURING: 15 growth stages; CONTAINS InterPro DOMAIN/s: Histone deacetylation protein Rxt3 (InterPro:IPR013951); Has 34444 Blast hits to 20801 proteins in 1175 species: Archae - 64; Bacteria - 2390; Metazoa - 15568; Fungi - 3729; Pla…	0.077	1.03758e-16	Down
AT4G32640.2	Sec23/Sec24 protein transport family protein	0.13	2.40701e-12	Down
AT3G46040.1	ribosomal protein S15A D	0.01	1.03758e-16	Down
AT4G19710.2	aspartate kinase-homoserine dehydrogenase ii	0.01	1.03758e-16	Down
AT1G75030.1	thaumatin-like protein 3	0.01	1.03758e-16	Down
AT4G17050.1	ureidoglycine aminohydrolase	0.319	7.30919e-05	Down
AT1G44790.1	ChaC-like family protein	0.282	6.4134e-06	Down
AT5G66420.2	LOCATED IN: cellular_component unknown; EXPRESSED IN: 23 plant structures; EXPRESSED DURING: 13 growth stages; CONTAINS InterPro DOMAIN/s: Uncharacterised conserved protein UCP033271 (InterPro:IPR008322), TIM-barrel signal transduction protein, predicted (InterPro:IPR009215); Has 1232 Blast hits to 1230 proteins in 311 species: Archae - 18; Bacteria - 959; Metazoa - 1; Fungi - 84; Plants - 42; Vi…	0.123	3.26586e-13	Down
AT1G75460.1	ATP-dependent protease La (LON) domain protein	0.01	1.03758e-16	Down
AT1G18450.1	actin-related protein 4	0.111	5.19323e-14	Down
AT4G15940.1	Fumarylacetoacetate (FAA) hydrolase family	0.155	1.09711e-13	Down
AT1G70070.1	DEAD/DEAH box helicase, putative	0.01	1.03758e-16	Down
AT5G51840.1	unknown protein; Has 30201 Blast hits to 17322 proteins in 780 species: Archae - 12; Bacteria - 1396; Metazoa - 17338; Fungi - 3422; Plants - 5037; Viruses - 0; Other Eukaryotes - 2996 (source: NCBI BLink).	0.01	1.03758e-16	Down
AT1G60780.1	Clathrin adaptor complexes medium subunit family protein	0.01	1.03758e-16	Down
AT3G43980.1	Ribosomal protein S14p/S29e family protein	0.01	1.03758e-16	Down
AT1G32440.1	plastidial pyruvate kinase 3	0.01	1.03758e-16	Down
AT5G25070.1	unknown protein; FUNCTIONS IN: molecular_function unknown; INVOLVED IN: biological_process unknown; LOCATED IN: cellular_component unknown; EXPRESSED IN: 23 plant structures; EXPRESSED DURING: 13 growth stages; Has 1807 Blast hits to 1807 proteins in 277 species: Archae - 0; Bacteria - 0; Metazoa - 736; Fungi - 347; Plants - 385; Viruses - 0; Other Eukaryotes - 339 (source: NCBI BLink).	0.01	1.03758e-16	Down
AT1G11660.1	heat shock protein 70 (Hsp 70) family protein	0.01	1.03758e-16	Down
AT4G39980.1	3-deoxy-D-arabino-heptulosonate 7-phosphate synthase 1	0.01	1.03758e-16	Down
AT4G34030.1	3-methylcrotonyl-CoA carboxylase	0.109	1.43849e-13	Down
AT2G07360.2	SH3 domain-containing protein	0.01	1.03758e-16	Down
AT5G52650.1	RNA binding Plectin/S10 domain-containing protein	0.072	1.03758e-16	Down
AT1G74880.1	NAD(P)H:plastoquinone dehydrogenase complex subunit O	0.01	1.03758e-16	Down
AT2G21370.1	xylulose kinase-1	0.095	1.03758e-16	Down
AT4G03430.1	pre-mRNA splicing factor-related	0.104	1.76217e-14	Down
AT1G09620.1	ATP binding;leucine-tRNA ligases;aminoacyl-tRNA ligases;nucleotide binding;ATP binding;aminoacyl-tRNA ligases	0.01	1.03758e-16	Down
AT5G06410.1	DNAJ heat shock N-terminal domain-containing protein	0.01	1.03758e-16	Down
AT1G15690.1	Inorganic H pyrophosphatase family protein	0.11	2.63275e-14	Down
AT5G17440.1	LUC7 related protein	0.01	1.03758e-16	Down
AT3G48140.1	B12D protein	0.01	1.03758e-16	Down
AT1G64640.1	early nodulin-like protein 8	0.01	1.03758e-16	Down
AT1G73600.2	S-adenosyl-L-methionine-dependent methyltransferases superfamily protein	0.01	1.03758e-16	Down
AT2G31750.1	UDP-glucosyl transferase 74D1	0.098	1.03758e-16	Down
AT3G57320.1	unknown protein; Has 30 Blast hits to 30 proteins in 13 species: Archae - 0; Bacteria - 0; Metazoa - 2; Fungi - 0; Plants - 28; Viruses - 0; Other Eukaryotes - 0 (source: NCBI BLink).	0.153	2.6467e-11	Down
AT4G10840.1	Tetratricopeptide repeat (TPR)-like superfamily protein	0.121	4.42696e-13	Down
AT1G16520.1	unknown protein; FUNCTIONS IN: molecular_function unknown; INVOLVED IN: biological_process unknown; LOCATED IN: plasma membrane; EXPRESSED IN: 22 plant structures; EXPRESSED DURING: 13 growth stages; BEST Arabidopsis thaliana protein match is: unknown protein (TAIR:AT1G56080.1); Has 243 Blast hits to 234 proteins in 69 species: Archae - 2; Bacteria - 2; Metazoa - 61; Fungi - 9; Plants - 125; Viru…	0.01	1.03758e-16	Down
AT2G35780.1	serine carboxypeptidase-like 26	0.096	1.03758e-16	Down
AT5G13260.1	unknown protein; BEST Arabidopsis thaliana protein match is: unknown protein (TAIR:AT3G48860.2); Has 30201 Blast hits to 17322 proteins in 780 species: Archae - 12; Bacteria - 1396; Metazoa - 17338; Fungi - 3422; Plants - 5037; Viruses - 0; Other Eukaryotes - 2996 (source: NCBI BLink).	0.096	1.03758e-16	Down
AT2G28900.1	outer plastid envelope protein 16-1	0.01	1.03758e-16	Down
AT1G54060.1	6B-interacting protein 1-like 1	0.01	1.03758e-16	Down
AT2G20230.1	Tetraspanin family protein	0.01	1.03758e-16	Down
AT1G26230.1	TCP-1/cpn60 chaperonin family protein	0.01	1.03758e-16	Down
AT5G13520.1	peptidase M1 family protein	0.01	1.03758e-16	Down
AT1G48570.1	zinc finger (Ran-binding) family protein	0.01	1.03758e-16	Down
AT4G31360.1	selenium binding	0.01	1.03758e-16	Down
AT4G30220.2	small nuclear ribonucleoprotein F	0.01	1.03758e-16	Down
AT2G18990.1	thioredoxin domain-containing protein 9 homolog	0.01	1.03758e-16	Down
AT3G12670.1	CTP synthase family protein	0.01	1.03758e-16	Down
AT5G08650.1	Small GTP-binding protein	0.01	1.03758e-16	Down
ATCG00020.1	photosystem II reaction center protein A	0.01	1.03758e-16	Down
AT5G17510.1	unknown protein; BEST Arabidopsis thaliana protein match is: unknown protein (TAIR:AT3G03460.1); Has 1807 Blast hits to 1807 proteins in 277 species: Archae - 0; Bacteria - 0; Metazoa - 736; Fungi - 347; Plants - 385; Viruses - 0; Other Eukaryotes - 339 (source: NCBI BLink).	0.01	1.03758e-16	Down
AT2G42910.1	Phosphoribosyltransferase family protein	0.01	1.03758e-16	Down
AT3G50520.1	Phosphoglycerate mutase family protein	0.01	1.03758e-16	Down
AT2G05620.1	proton gradient regulation 5	0.112	1.76217e-14	Down
AT2G32230.1	proteinaceous RNase P 1	0.01	1.03758e-16	Down
AT2G39260.1	binding;RNA binding	0.075	1.03758e-16	Down
AT1G48160.1	signal recognition particle 19 kDa protein, putative / SRP19, putative	0.107	6.81211e-15	Down
AT1G78510.1	solanesyl diphosphate synthase 1	0.01	1.03758e-16	Down
AT5G19760.1	Mitochondrial substrate carrier family protein	0.01	1.03758e-16	Down
AT5G40610.1	NAD-dependent glycerol-3-phosphate dehydrogenase family protein	0.01	1.03758e-16	Down
AT1G49670.2	ARP protein (REF)	0.01	1.03758e-16	Down
AT3G47450.1	P-loop containing nucleoside triphosphate hydrolases superfamily protein	0.01	1.03758e-16	Down
AT2G16485.1	nucleic acid binding;zinc ion binding;DNA binding	0.01	1.03758e-16	Down
AT5G19180.1	E1 C-terminal related 1	0.01	1.03758e-16	Down
AT5G44520.1	NagB/RpiA/CoA transferase-like superfamily protein	0.01	1.03758e-16	Down
AT3G07670.1	Rubisco methyltransferase family protein	0.01	1.03758e-16	Down
AT2G35940.1	BEL1-like homeodomain 1	0.01	1.03758e-16	Down
AT1G66130.1	NAD(P)-binding Rossmann-fold superfamily protein	0.01	1.03758e-16	Down
AT4G23040.1	Ubiquitin-like superfamily protein	0.084	1.03758e-16	Down
AT2G44065.2	Ribosomal protein L2 family	0.01	1.03758e-16	Down
AT4G16990.2	disease resistance protein (TIR-NBS class), putative	0.01	1.03758e-16	Down
AT2G38580.1	Mitochondrial ATP synthase D chain-related protein	0.01	1.03758e-16	Down
AT2G45600.1	alpha/beta-Hydrolases superfamily protein	0.106	8.97205e-15	Down
AT1G17140.2	interactor of constitutive active rops 1	0.091	1.03758e-16	Down
AT1G33330.1	Class I peptide chain release factor	0.01	1.03758e-16	Down
AT3G16470.1	Mannose-binding lectin superfamily protein	5.077	3.57912e-13	Up
AT1G19570.1	dehydroascorbate reductase	5.515	1.55431e-14	Up
AT1G07930.2	GTP binding Elongation factor Tu family protein	7.758	3.17352e-12	Up
AT4G08870.1	Arginase/deacetylase superfamily protein	7.073	1.03758e-16	Up
AT4G23600.1	Tyrosine transaminase family protein	6.297	1.03758e-16	Up
AT1G02930.1	glutathione S-transferase 6	3.774	8.1426e-09	Up
AT1G52400.1	beta glucosidase 18	3.426	2.81207e-07	Up
AT1G02920.1	glutathione S-transferase 7	3.785	2.78261e-08	Up
AT1G45145.1	thioredoxin H-type 5	5.409	5.59138e-13	Up
AT4G17470.2	alpha/beta-Hydrolases superfamily protein	3.491	1.84539e-07	Up
AT5G24770.1	vegetative storage protein 2	100	1.03758e-16	Up
AT5G59310.1	lipid transfer protein 4	3.406	5.20979e-07	Up
AT1G52040.1	myrosinase-binding protein 1	100	1.03758e-16	Up
AT5G64120.1	Peroxidase superfamily protein	4.392	7.49402e-10	Up
AT4G27070.1	tryptophan synthase beta-subunit 2	100	1.03758e-16	Up
AT1G69410.1	eukaryotic elongation factor 5A-3	10.53	1.03758e-16	Up
AT1G04710.1	peroxisomal 3-ketoacyl-CoA thiolase 4	100	1.03758e-16	Up
AT1G52030.1	myrosinase-binding protein 2	4.448	7.45806e-06	Up
AT1G20693.1	high mobility group B2	10.957	8.97205e-15	Up
AT3G15790.1	methyl-CPG-binding domain 11	100	1.03758e-16	Up
AT3G44300.1	nitrilase 2	100	1.03758e-16	Up
AT3G02230.1	reversibly glycosylated polypeptide 1	100	1.03758e-16	Up
AT5G06870.1	polygalacturonase inhibiting protein 2	3.331	8.0581e-06	Up
AT3G13750.1	beta galactosidase 1	100	1.03758e-16	Up
AT2G04880.1	zinc-dependent activator protein-1	12.282	1.03758e-16	Up
AT5G25540.1	CTC-interacting domain 6	100	1.03758e-16	Up
AT1G53280.1	Class I glutamine amidotransferase-like superfamily protein	3.068	0.00201166	Up
AT2G28760.1	UDP-XYL synthase 6	100	1.03758e-16	Up
AT4G34740.1	GLN phosphoribosyl pyrophosphate amidotransferase 2	3.281	0.000311809	Up
AT3G02760.1	Class II aaRS and biotin synthetases superfamily protein	100	1.03758e-16	Up
AT1G19870.1	IQ-domain 32	100	1.03758e-16	Up
AT1G74260.1	purine biosynthesis 4	10.782	1.55431e-14	Up
AT4G17890.1	ARF-GAP domain 8	100	1.03758e-16	Up
AT2G21060.1	glycine-rich protein 2B	9.896	1.03758e-16	Up
AT2G46290.1	Transducin/WD40 repeat-like superfamily protein	100	1.03758e-16	Up
AT3G51880.1	high mobility group B1	100	1.03758e-16	Up
AT4G37520.1	Peroxidase superfamily protein	100	1.03758e-16	Up
AT4G21830.1	methionine sulfoxide reductase B7	4.536	2.34198e-09	Up
AT5G66550.1	Maf-like protein	100	1.03758e-16	Up
AT2G44360.1	unknown protein; Has 23 Blast hits to 23 proteins in 10 species: Archae - 0; Bacteria - 0; Metazoa - 0; Fungi - 0; Plants - 23; Viruses - 0; Other Eukaryotes - 0 (source: NCBI BLink).	4.226	2.21804e-05	Up
AT5G05590.1	phosphoribosylanthranilate isomerase 2	100	1.03758e-16	Up
AT5G09440.1	EXORDIUM like 4	15.248	1.03758e-16	Up
AT3G48860.2	unknown protein; INVOLVED IN: biological_process unknown; LOCATED IN: plasma membrane; EXPRESSED IN: 22 plant structures; EXPRESSED DURING: 13 growth stages; BEST Arabidopsis thaliana protein match is: unknown protein (TAIR:AT5G23700.1); Has 12429 Blast hits to 9751 proteins in 897 species: Archae - 180; Bacteria - 1190; Metazoa - 6552; Fungi - 1361; Plants - 886; Viruses - 50; Other Eukaryotes -…	3.626	0.000391265	Up
AT2G43530.1	Scorpion toxin-like knottin superfamily protein	3.448	3.10076e-07	Up
AT1G71730.1	unknown protein; Has 52 Blast hits to 52 proteins in 24 species: Archae - 0; Bacteria - 0; Metazoa - 4; Fungi - 0; Plants - 41; Viruses - 0; Other Eukaryotes - 7 (source: NCBI BLink).	100	1.03758e-16	Up
AT3G19480.1	D-3-phosphoglycerate dehydrogenase	100	1.03758e-16	Up
AT5G64260.1	EXORDIUM like 2	100	1.03758e-16	Up
AT1G09070.1	soybean gene regulated by cold-2	3.418	1.2764e-05	Up
AT1G14250.1	GDA1/CD39 nucleoside phosphatase family protein	100	1.03758e-16	Up
AT2G42790.1	citrate synthase 3	100	1.03758e-16	Up
AT1G05805.1	basic helix-loop-helix (bHLH) DNA-binding superfamily protein	18.133	1.03758e-16	Up
AT2G45220.1	Plant invertase/pectin methylesterase inhibitor superfamily	100	1.03758e-16	Up
AT5G11330.1	FAD/NAD(P)-binding oxidoreductase family protein	100	1.03758e-16	Up
AT4G36800.1	RUB1 conjugating enzyme 1	100	1.03758e-16	Up
AT5G64370.1	beta-ureidopropionase	4.149	1.21107e-05	Up
AT4G37925.1	subunit NDH-M of NAD(P)H:plastoquinone dehydrogenase complex	100	1.03758e-16	Up
AT4G04610.1	APS reductase 1	100	1.03758e-16	Up
AT5G55200.1	Co-chaperone GrpE family protein	100	1.03758e-16	Up
AT4G29830.1	Transducin/WD40 repeat-like superfamily protein	5.606	1.97765e-12	Up
AT3G42050.1	vacuolar ATP synthase subunit H family protein	100	1.03758e-16	Up
AT2G41410.1	Calcium-binding EF-hand family protein	100	1.03758e-16	Up
AT3G48330.1	protein-l-isoaspartate methyltransferase 1	100	1.03758e-16	Up
AT2G22360.1	DNAJ heat shock family protein	100	1.03758e-16	Up
AT5G47480.1	RGPR-related	100	1.03758e-16	Up
AT1G24160.1	unknown protein; BEST Arabidopsis thaliana protein match is: unknown protein (TAIR:AT1G70100.3); Has 5230 Blast hits to 4162 proteins in 477 species: Archae - 30; Bacteria - 540; Metazoa - 2022; Fungi - 429; Plants - 280; Viruses - 32; Other Eukaryotes - 1897 (source: NCBI BLink).	100	1.03758e-16	Up
AT2G43820.1	UDP-glucosyltransferase 74F2	10.788	1.03758e-16	Up
AT2G42500.1	protein phosphatase 2A-3	100	1.03758e-16	Up
AT1G72230.1	Cupredoxin superfamily protein	100	1.03758e-16	Up
AT3G47560.2	alpha/beta-Hydrolases superfamily protein	100	1.03758e-16	Up
AT1G21250.1	cell wall-associated kinase	100	1.03758e-16	Up
AT1G01160.2	GRF1-interacting factor 2	100	1.03758e-16	Up
AT3G43300.1	HOPM interactor 7	18.242	1.03758e-16	Up
AT5G48180.1	nitrile specifier protein 5	100	1.03758e-16	Up
AT2G02570.4	nucleic acid binding;RNA binding	100	1.03758e-16	Up
AT1G12050.1	fumarylacetoacetase, putative	3.153	0.000820379	Up
AT2G27920.1	serine carboxypeptidase-like 51	100	1.03758e-16	Up
AT5G22120.1	unknown protein; FUNCTIONS IN: molecular_function unknown; INVOLVED IN: biological_process unknown; LOCATED IN: cellular_component unknown; EXPRESSED IN: cultured cell; Has 30201 Blast hits to 17322 proteins in 780 species: Archae - 12; Bacteria - 1396; Metazoa - 17338; Fungi - 3422; Plants - 5037; Viruses - 0; Other Eukaryotes - 2996 (source: NCBI BLink).	100	1.03758e-16	Up
AT2G47850.3	Zinc finger C-x8-C-x5-C-x3-H type family protein	9.654	9.48373e-14	Up
AT4G01480.1	pyrophosphorylase 5	100	1.03758e-16	Up
AT3G60450.1	Phosphoglycerate mutase family protein	100	1.03758e-16	Up
AT1G61690.1	phosphoinositide binding	100	1.03758e-16	Up
AT2G27170.2	Structural maintenance of chromosomes (SMC) family protein	100	1.03758e-16	Up
AT4G15900.1	pleiotropic regulatory locus 1	100	1.03758e-16	Up
AT2G18660.1	plant natriuretic peptide A	100	1.03758e-16	Up
AT2G02990.1	ribonuclease 1	100	1.03758e-16	Up
AT1G31817.1	Ribosomal L18p/L5e family protein	100	1.03758e-16	Up
AT1G70810.1	Calcium-dependent lipid-binding (CaLB domain) family protein	4.864	5.43296e-06	Up
AT4G12780.1	Chaperone DnaJ-domain superfamily protein	100	1.03758e-16	Up
AT2G25110.1	stromal cell-derived factor 2-like protein precursor	100	1.03758e-16	Up
AT3G06860.1	multifunctional protein 2	11.347	2.28009e-15	Up
AT2G19570.1	cytidine deaminase 1	4.222	1.36372e-05	Up
AT3G09260.1	Glycosyl hydrolase superfamily protein	100	1.03758e-16	Up
AT2G26280.1	CTC-interacting domain 7	100	1.03758e-16	Up
AT3G09940.1	monodehydroascorbate reductase	100	1.03758e-16	Up
AT3G52400.1	syntaxin of plants 122	100	1.03758e-16	Up
AT1G76140.1	Prolyl oligopeptidase family protein	11.298	1.03758e-16	Up
AT4G05160.1	AMP-dependent synthetase and ligase family protein	100	1.03758e-16	Up
AT1G64500.1	Glutaredoxin family protein	5.097	1.13754e-07	Up
AT3G09970.1	Calcineurin-like metallo-phosphoesterase superfamily protein	100	1.03758e-16	Up
AT4G18930.1	RNA ligase/cyclic nucleotide phosphodiesterase family protein	100	1.03758e-16	Up
AT1G20580.1	Small nuclear ribonucleoprotein family protein	100	1.03758e-16	Up
AT2G15860.1	unknown protein; FUNCTIONS IN: molecular_function unknown; INVOLVED IN: biological_process unknown; LOCATED IN: cellular_component unknown; EXPRESSED IN: 24 plant structures; EXPRESSED DURING: 13 growth stages; Has 30201 Blast hits to 17322 proteins in 780 species: Archae - 12; Bacteria - 1396; Metazoa - 17338; Fungi - 3422; Plants - 5037; Viruses - 0; Other Eukaryotes - 2996 (source: NCBI BLink).	100	1.03758e-16	Up
AT2G43510.1	trypsin inhibitor protein 1	100	1.03758e-16	Up
AT4G30930.1	Ribosomal protein L21	100	1.03758e-16	Up
AT5G24400.1	NagB/RpiA/CoA transferase-like superfamily protein	10.782	2.28009e-15	Up
AT3G12500.1	basic chitinase	4.603	1.49194e-06	Up
AT1G21640.2	NAD kinase 2	100	1.03758e-16	Up
AT3G20630.1	ubiquitin-specific protease 14	100	1.03758e-16	Up
AT5G50210.1	quinolinate synthase	100	1.03758e-16	Up
AT5G61580.1	phosphofructokinase 4	100	1.03758e-16	Up
AT1G72330.3	alanine aminotransferase 2	100	1.03758e-16	Up
AT1G58280.2	Phosphoglycerate mutase family protein	100	1.03758e-16	Up
AT1G26390.1	FAD-binding Berberine family protein	100	1.03758e-16	Up
AT3G55970.1	jasmonate-regulated gene 21	100	1.03758e-16	Up
AT5G53120.6	spermidine synthase 3	8.03	1.24474e-10	Up
AT2G17840.1	Senescence/dehydration-associated protein-related	100	1.03758e-16	Up
AT4G02610.1	Aldolase-type TIM barrel family protein	100	1.03758e-16	Up
AT4G04910.1	AAA-type ATPase family protein	9.245	1.84554e-12	Up
AT1G07960.1	PDI-like 5-1	9.551	1.89273e-11	Up
AT4G20930.1	6-phosphogluconate dehydrogenase family protein	8.771	3.20282e-12	Up
AT1G32580.1	plastid developmental protein DAG, putative	100	1.03758e-16	Up
AT5G57490.1	voltage dependent anion channel 4	100	1.03758e-16	Up
AT5G24530.1	2-oxoglutarate (2OG) and Fe(II)-dependent oxygenase superfamily protein	100	1.03758e-16	Up
AT2G25430.1	epsin N-terminal homology (ENTH) domain-containing protein / clathrin assembly protein-related	100	1.03758e-16	Up
AT2G38730.1	Cyclophilin-like peptidyl-prolyl cis-trans isomerase family protein	100	1.03758e-16	Up
AT5G41220.1	glutathione S-transferase THETA 3	100	1.03758e-16	Up
AT1G19140.2	FUNCTIONS IN: molecular_function unknown; INVOLVED IN: ubiquinone biosynthetic process; LOCATED IN: mitochondrion; EXPRESSED IN: 24 plant structures; EXPRESSED DURING: 15 growth stages; CONTAINS InterPro DOMAIN/s: COQ9 (InterPro:IPR013718), Ubiquinone biosynthesis protein COQ9 (InterPro:IPR012762); Has 35333 Blast hits to 34131 proteins in 2444 species: Archae - 798; Bacteria - 22429; Metazoa - 9…	100	1.03758e-16	Up
AT3G23980.1	BLISTER	8.149	1.38203e-11	Up
AT3G48710.1	DEK domain-containing chromatin associated protein	100	1.03758e-16	Up
AT4G30530.1	Class I glutamine amidotransferase-like superfamily protein	3.09	0.00173029	Up
AT5G24420.1	6-phosphogluconolactonase 5	100	1.03758e-16	Up
AT5G03170.1	FASCICLIN-like arabinogalactan-protein 11	3.793	9.38321e-05	Up
AT1G07440.1	NAD(P)-binding Rossmann-fold superfamily protein	9.094	5.22296e-13	Up
AT5G60490.1	FASCICLIN-like arabinogalactan-protein 12	5.49	3.77823e-08	Up
AT3G47340.1	glutamine-dependent asparagine synthase 1	3.092	0.00182102	Up
AT5G09250.1	ssDNA-binding transcriptional regulator	3.66	9.539e-05	Up
AT1G49660.1	carboxyesterase 5	10.547	5.19323e-14	Up
AT1G13990.3	unknown protein; FUNCTIONS IN: molecular_function unknown; INVOLVED IN: biological_process unknown; LOCATED IN: chloroplast; EXPRESSED IN: 23 plant structures; EXPRESSED DURING: 13 growth stages; CONTAINS InterPro DOMAIN/s: Protein of unknown function DUF3110 (InterPro:IPR021503); Has 4 Blast hits to 4 proteins in 1 species: Archae - 0; Bacteria - 0; Metazoa - 0; Fungi - 0; Plants - 4; Viruses - …	100	1.03758e-16	Up
AT1G02140.1	mago nashi family protein	10.924	1.76217e-14	Up
AT1G64230.4	ubiquitin-conjugating enzyme 28	100	1.03758e-16	Up
AT5G13010.1	RNA helicase family protein	3.472	0.000384271	Up
AT2G03150.1	ATP/GTP-binding protein family	100	1.03758e-16	Up
AT4G13180.1	NAD(P)-binding Rossmann-fold superfamily protein	100	1.03758e-16	Up
AT3G55605.1	Mitochondrial glycoprotein family protein	10.772	3.27143e-14	Up
AT4G36400.2	FAD-linked oxidases family protein	100	1.03758e-16	Up
AT2G46600.1	Calcium-binding EF-hand family protein	3.507	0.000938616	Up
AT2G39900.1	GATA type zinc finger transcription factor family protein	100	1.03758e-16	Up
AT5G58390.1	Peroxidase superfamily protein	100	1.03758e-16	Up
AT4G13860.1	RNA-binding (RRM/RBD/RNP motifs) family protein	12.586	1.03758e-16	Up
AT1G04190.1	Tetratricopeptide repeat (TPR)-like superfamily protein	100	1.03758e-16	Up
AT1G65700.1	Small nuclear ribonucleoprotein family protein	14.639	1.03758e-16	Up

## Sheet: emptyvector_Day0_vs_Day3
Table S3. List of differentially expressed proteins in empty vector-transformed Arabidopsis between day 0 and day 3 of Pst DC3000 inoculation.
Accession	Description	Abundance Ratio: (3dpi-Empty vector V7) / (0dpi-Empty vector V7)	Abundance Ratio Adj. P-Value: (3dpi-Empty vector V7) / (0dpi-Empty vector V7)	Direction of change
AT5G26742.1	DEAD box RNA helicase (RH3)	0.01	1.06345e-16	Down
AT5G26742.2	DEAD box RNA helicase (RH3)	0.325	4.29777e-05	Down
AT2G29630.1	thiaminC	0.302	0.00215336	Down
AT5G15490.1	UDP-glucose 6-dehydrogenase family protein	0.01	1.06345e-16	Down
AT5G49460.1	ATP citrate lyase subunit B 2	0.01	1.06345e-16	Down
AT5G25460.1	Protein of unknown function, DUF642	0.288	0.000496557	Down
AT2G32730.1	26S proteasome regulatory complex, non-ATPase subcomplex, Rpn2/Psmd1 subunit	0.331	0.000486282	Down
AT1G76100.1	plastocyanin 1	0.312	2.34623e-05	Down
AT5G13650.2	elongation factor family protein	0.305	0.000565851	Down
AT4G31480.2	Coatomer, beta subunit	0.296	0.00219849	Down
AT1G60950.1	2Fe-2S ferredoxin-like superfamily protein	0.16	2.63838e-08	Down
AT3G18000.1	S-adenosyl-L-methionine-dependent methyltransferases superfamily protein	0.01	1.06345e-16	Down
ATCG00350.1	Photosystem I, PsaA/PsaB protein	0.08	4.71275e-15	Down
AT4G00660.1	RNAhelicase-like 8	0.094	1.92043e-10	Down
AT3G61240.2	DEA(D/H)-box RNA helicase family protein	0.01	1.06345e-16	Down
AT3G32980.1	Peroxidase superfamily protein	0.01	1.06345e-16	Down
AT5G20990.1	molybdopterin biosynthesis CNX1 protein / molybdenum cofactor biosynthesis enzyme CNX1 (CNX1)	0.097	4.40447e-08	Down
AT3G27530.1	golgin candidate 6	0.01	1.06345e-16	Down
AT5G16620.1	hydroxyproline-rich glycoprotein family protein	0.01	1.06345e-16	Down
AT3G60190.1	DYNAMIN-like 1E	0.01	1.06345e-16	Down
AT1G16810.1	unknown protein; CONTAINS InterPro DOMAIN/s: Protein of unknown function DUF1754, eukaryotic (InterPro:IPR013865); Has 395 Blast hits to 394 proteins in 162 species: Archae - 0; Bacteria - 0; Metazoa - 181; Fungi - 91; Plants - 65; Viruses - 0; Other Eukaryotes - 58 (source: NCBI BLink).	0.237	0.00177966	Down
AT4G03120.1	C2H2 and C2HC zinc fingers superfamily protein	0.01	1.06345e-16	Down
AT1G10670.1	ATP-citrate lyase A-1	0.01	1.06345e-16	Down
AT2G14720.1	vacuolar sorting receptor 4	0.01	1.06345e-16	Down
AT3G63410.1	S-adenosyl-L-methionine-dependent methyltransferases superfamily protein	0.01	1.06345e-16	Down
AT4G39080.1	vacuolar proton ATPase A3	0.01	1.06345e-16	Down
AT2G33340.1	MOS4-associated complex 3B	0.01	1.06345e-16	Down
AT4G16390.1	pentatricopeptide (PPR) repeat-containing protein	0.324	0.0101956	Down
AT3G48860.2	unknown protein; INVOLVED IN: biological_process unknown; LOCATED IN: plasma membrane; EXPRESSED IN: 22 plant structures; EXPRESSED DURING: 13 growth stages; BEST Arabidopsis thaliana protein match is: unknown protein (TAIR:AT5G23700.1); Has 12429 Blast hits to 9751 proteins in 897 species: Archae - 180; Bacteria - 1190; Metazoa - 6552; Fungi - 1361; Plants - 886; Viruses - 50; Other Eukaryotes -…	0.115	9.51413e-06	Down
AT5G03650.1	starch branching enzyme 2.2	0.01	1.06345e-16	Down
AT5G64260.1	EXORDIUM like 2	0.187	0.00146815	Down
AT1G15750.1	Transducin family protein / WD-40 repeat family protein	0.01	1.06345e-16	Down
AT4G32640.2	Sec23/Sec24 protein transport family protein	0.01	1.06345e-16	Down
AT1G48420.1	D-cysteine desulfhydrase	0.01	1.06345e-16	Down
AT2G45240.1	methionine aminopeptidase 1A	0.01	1.06345e-16	Down
AT1G02080.1	transcription regulators	0.01	1.06345e-16	Down
AT3G46040.1	ribosomal protein S15A D	0.01	1.06345e-16	Down
AT4G34230.1	cinnamyl alcohol dehydrogenase 5	0.083	4.1064e-11	Down
AT5G42390.1	Insulinase (Peptidase family M16) family protein	0.201	8.30221e-05	Down
AT4G19710.2	aspartate kinase-homoserine dehydrogenase ii	0.01	1.06345e-16	Down
AT3G43980.1	Ribosomal protein S14p/S29e family protein	0.282	0.000914603	Down
AT4G39980.1	3-deoxy-D-arabino-heptulosonate 7-phosphate synthase 1	0.01	1.06345e-16	Down
AT1G70310.1	spermidine synthase 2	0.01	1.06345e-16	Down
AT5G08000.1	glucan endo-1,3-beta-glucosidase-like protein 3	0.01	1.06345e-16	Down
AT3G48670.1	XH/XS domain-containing protein	0.01	1.06345e-16	Down
AT2G22360.1	DNAJ heat shock family protein	0.01	1.06345e-16	Down
AT5G43970.1	translocase of outer membrane 22-V	0.106	3.98841e-07	Down
AT5G52650.1	RNA binding Plectin/S10 domain-containing protein	0.29	0.00308317	Down
AT5G17020.1	exportin 1A	0.01	1.06345e-16	Down
AT3G49720.1	unknown protein; FUNCTIONS IN: molecular_function unknown; INVOLVED IN: biological_process unknown; LOCATED IN: chloroplast thylakoid membrane, Golgi apparatus, plasma membrane, membrane; EXPRESSED IN: 25 plant structures; EXPRESSED DURING: 15 growth stages; BEST Arabidopsis thaliana protein match is: unknown protein (TAIR:AT5G65810.1); Has 64 Blast hits to 64 proteins in 11 species: Archae - 0; …	0.01	1.06345e-16	Down
AT3G02200.2	Proteasome component (PCI) domain protein	0.01	1.06345e-16	Down
AT5G25610.1	BURP domain-containing protein	0.01	1.06345e-16	Down
AT2G13540.1	ARM repeat superfamily protein	0.01	1.06345e-16	Down
AT3G43300.1	HOPM interactor 7	0.01	1.06345e-16	Down
AT5G47770.1	farnesyl diphosphate synthase 1	0.01	1.06345e-16	Down
AT3G20810.1	2-oxoglutarate (2OG) and Fe(II)-dependent oxygenase superfamily protein	0.01	1.06345e-16	Down
AT5G25754.1	RNA polymerase I-associated factor PAF67	0.01	1.06345e-16	Down
AT4G36810.1	geranylgeranyl pyrophosphate synthase 1	0.01	1.06345e-16	Down
AT2G27170.2	Structural maintenance of chromosomes (SMC) family protein	0.01	1.06345e-16	Down
AT1G15130.1	Endosomal targeting BRO1-like domain-containing protein	0.01	1.06345e-16	Down
AT1G15690.1	Inorganic H pyrophosphatase family protein	0.242	0.000914603	Down
AT3G63160.1	FUNCTIONS IN: molecular_function unknown; INVOLVED IN: biological_process unknown; LOCATED IN: chloroplast outer membrane, thylakoid, chloroplast thylakoid membrane, chloroplast, chloroplast envelope; EXPRESSED IN: 21 plant structures; EXPRESSED DURING: 13 growth stages; BEST Arabidopsis thaliana protein match is: outer envelope membrane protein 7 (TAIR:AT3G52420.1); Has 26 Blast hits to 26 prote…	0.01	1.06345e-16	Down
AT5G39590.1	TLD-domain containing nucleolar protein	0.01	1.06345e-16	Down
AT1G69200.1	fructokinase-like 2	0.01	1.06345e-16	Down
AT1G73600.2	S-adenosyl-L-methionine-dependent methyltransferases superfamily protein	0.01	1.06345e-16	Down
AT3G19820.3	cell elongation protein / DWARF1 / DIMINUTO (DIM)	0.01	1.06345e-16	Down
AT5G60160.1	Zn-dependent exopeptidases superfamily protein	0.01	1.06345e-16	Down
AT4G10840.1	Tetratricopeptide repeat (TPR)-like superfamily protein	0.281	0.0157267	Down
AT4G05160.1	AMP-dependent synthetase and ligase family protein	0.301	0.0131391	Down
AT4G15560.1	Deoxyxylulose-5-phosphate synthase	0.109	9.63006e-09	Down
AT2G27210.1	BRI1 suppressor 1 (BSU1)-like 3	0.01	1.06345e-16	Down
AT2G35780.1	serine carboxypeptidase-like 26	0.3	0.0162691	Down
AT5G13260.1	unknown protein; BEST Arabidopsis thaliana protein match is: unknown protein (TAIR:AT3G48860.2); Has 30201 Blast hits to 17322 proteins in 780 species: Archae - 12; Bacteria - 1396; Metazoa - 17338; Fungi - 3422; Plants - 5037; Viruses - 0; Other Eukaryotes - 2996 (source: NCBI BLink).	0.01	1.06345e-16	Down
AT5G53000.1	2A phosphatase associated protein of 46 kD	0.01	1.06345e-16	Down
AT5G63190.1	MA3 domain-containing protein	0.01	1.06345e-16	Down
AT3G53420.1	plasma membrane intrinsic protein 2A	0.203	5.89699e-05	Down
AT2G44790.1	uclacyanin 2	0.01	1.06345e-16	Down
AT5G08610.1	P-loop containing nucleoside triphosphate hydrolases superfamily protein	0.01	1.06345e-16	Down
AT1G26230.1	TCP-1/cpn60 chaperonin family protein	0.01	1.06345e-16	Down
AT3G12080.1	GTP-binding family protein	0.01	1.06345e-16	Down
AT1G03090.2	methylcrotonyl-CoA carboxylase alpha chain, mitochondrial / 3-methylcrotonyl-CoA carboxylase 1 (MCCA)	0.01	1.06345e-16	Down
AT4G23730.1	Galactose mutarotase-like superfamily protein	0.01	1.06345e-16	Down
AT5G13520.1	peptidase M1 family protein	0.01	1.06345e-16	Down
AT5G46180.1	ornithine-delta-aminotransferase	0.01	1.06345e-16	Down
AT1G48570.1	zinc finger (Ran-binding) family protein	0.01	1.06345e-16	Down
AT4G14570.1	acylaminoacyl-peptidase-related	0.01	1.06345e-16	Down
AT5G14170.1	SWIB/MDM2 domain superfamily protein	0.01	1.06345e-16	Down
AT2G38560.1	transcript elongation factor IIS	0.01	1.06345e-16	Down
AT4G02610.1	Aldolase-type TIM barrel family protein	0.185	0.000198649	Down
AT3G49990.1	unknown protein; Has 1524 Blast hits to 1298 proteins in 225 species: Archae - 9; Bacteria - 84; Metazoa - 474; Fungi - 184; Plants - 98; Viruses - 17; Other Eukaryotes - 658 (source: NCBI BLink).	0.01	1.06345e-16	Down
AT5G38830.1	Cysteinyl-tRNA synthetase, class Ia family protein	0.01	1.06345e-16	Down
AT3G12670.1	CTP synthase family protein	0.01	1.06345e-16	Down
AT5G02270.2	non-intrinsic ABC protein 9	0.01	1.06345e-16	Down
AT5G57490.1	voltage dependent anion channel 4	0.01	1.06345e-16	Down
AT2G23420.1	nicotinate phosphoribosyltransferase 2	0.01	1.06345e-16	Down
AT1G76850.1	exocyst complex component sec5	0.293	0.0267394	Down
AT4G30720.1	FAD/NAD(P)-binding oxidoreductase family protein	0.073	2.12851e-08	Down
AT2G13440.1	glucose-inhibited division family A protein	0.01	1.06345e-16	Down
AT5G34850.1	purple acid phosphatase 26	0.106	1.27759e-08	Down
AT2G44640.1	FUNCTIONS IN: molecular_function unknown; INVOLVED IN: biological_process unknown; LOCATED IN: mitochondrion, chloroplast, plasma membrane, plastid, chloroplast envelope; EXPRESSED IN: 23 plant structures; EXPRESSED DURING: 13 growth stages; CONTAINS InterPro DOMAIN/s: Protein of unknown function DUF3769 (InterPro:IPR022244); BEST Arabidopsis thaliana protein match is: pigment defective 320 (TAIR…	0.331	0.0229979	Down
AT1G04350.1	2-oxoglutarate (2OG) and Fe(II)-dependent oxygenase superfamily protein	0.01	1.06345e-16	Down
AT5G30490.2	FUNCTIONS IN: molecular_function unknown; INVOLVED IN: biological_process unknown; LOCATED IN: cellular_component unknown; EXPRESSED IN: 22 plant structures; EXPRESSED DURING: 13 growth stages; CONTAINS InterPro DOMAIN/s: Craniofacial development protein 1/Bucentaur (InterPro:IPR011421); Has 333 Blast hits to 324 proteins in 149 species: Archae - 0; Bacteria - 18; Metazoa - 117; Fungi - 96; Plant…	0.324	0.0329684	Down
AT5G16715.1	ATP binding;valine-tRNA ligases;aminoacyl-tRNA ligases;nucleotide binding;ATP binding;aminoacyl-tRNA ligases	0.01	1.06345e-16	Down
AT5G25100.2	Endomembrane protein 70 protein family	0.01	1.06345e-16	Down
AT1G01960.1	SEC7-like guanine nucleotide exchange family protein	0.01	1.06345e-16	Down
AT1G61010.2	cleavage and polyadenylation specificity factor 73-I	0.01	1.06345e-16	Down
AT2G47250.1	RNA helicase family protein	0.01	1.06345e-16	Down
AT3G02630.1	Plant stearoyl-acyl-carrier-protein desaturase family protein	0.01	1.06345e-16	Down
AT1G49670.2	ARP protein (REF)	0.01	1.06345e-16	Down
AT3G47450.1	P-loop containing nucleoside triphosphate hydrolases superfamily protein	0.01	1.06345e-16	Down
AT5G62390.1	BCL-2-associated athanogene 7	0.01	1.06345e-16	Down
AT2G28390.1	SAND family protein	0.01	1.06345e-16	Down
AT4G23630.1	VIRB2-interacting protein 1	0.01	1.06345e-16	Down
AT5G05210.1	Surfeit locus protein 6	0.01	1.06345e-16	Down
AT5G47110.1	Chlorophyll A-B binding family protein	0.01	1.06345e-16	Down
AT3G13490.1	Lysyl-tRNA synthetase, class II	0.01	1.06345e-16	Down
AT2G38360.1	prenylated RAB acceptor 1.B4	0.099	6.70756e-07	Down
AT1G79380.1	Ca(2)-dependent phospholipid-binding protein (Copine) family	0.01	1.06345e-16	Down
AT5G25220.1	KNOTTED1-like homeobox gene 3	0.1	3.90469e-07	Down
AT2G45600.1	alpha/beta-Hydrolases superfamily protein	0.01	1.06345e-16	Down
AT4G13770.1	cytochrome P450, family 83, subfamily A, polypeptide 1	0.01	1.06345e-16	Down
AT1G21660.1	Chaperone DnaJ-domain superfamily protein	0.01	1.06345e-16	Down
AT1G23205.1	Plant invertase/pectin methylesterase inhibitor superfamily protein	0.01	1.06345e-16	Down
AT5G54440.1	CLUB	0.01	1.06345e-16	Down
AT1G54460.1	TPX2 (targeting protein for Xklp2) protein family	0.01	1.06345e-16	Down
AT3G29200.1	chorismate mutase 1	0.01	1.06345e-16	Down
AT3G12400.1	Ubiquitin-conjugating enzyme/RWD-like protein	0.01	1.06345e-16	Down
AT4G35970.1	ascorbate peroxidase 5	0.01	1.06345e-16	Down
AT1G50380.1	Prolyl oligopeptidase family protein	0.01	1.06345e-16	Down
AT2G27040.1	Argonaute family protein	0.11	2.25595e-07	Down
AT1G64790.2	ILITYHIA	0.01	1.06345e-16	Down
AT2G03510.1	SPFH/Band 7/PHB domain-containing membrane-associated protein family	0.01	1.06345e-16	Down
AT3G16420.2	PYK10-binding protein 1	3.233	0.00215873	Up
AT3G16470.1	Mannose-binding lectin superfamily protein	6.741	4.34627e-09	Up
AT1G19570.1	dehydroascorbate reductase	4.664	7.1731e-06	Up
AT4G08870.1	Arginase/deacetylase superfamily protein	8.849	6.0616e-12	Up
AT4G23600.1	Tyrosine transaminase family protein	6.845	3.08232e-09	Up
AT1G52400.1	beta glucosidase 18	3.492	0.000978088	Up
AT1G02920.1	glutathione S-transferase 7	5.414	1.10881e-06	Up
AT3G57260.1	beta-1,3-glucanase 2	6.127	3.47027e-08	Up
AT1G45145.1	thioredoxin H-type 5	7.257	2.25851e-10	Up
AT4G17470.2	alpha/beta-Hydrolases superfamily protein	3.927	0.000441224	Up
AT2G36060.2	MMS ZWEI homologue 3	4.904	0.000638943	Up
AT5G24780.1	vegetative storage protein 1	3.643	0.000449361	Up
AT5G54190.1	protochlorophyllide oxidoreductase A	3.936	0.0120341	Up
AT5G24770.1	vegetative storage protein 2	100	1.06345e-16	Up
AT5G59310.1	lipid transfer protein 4	6.131	2.96942e-08	Up
AT1G52040.1	myrosinase-binding protein 1	3.99	0.000977525	Up
AT4G30270.1	xyloglucan endotransglucosylase/hydrolase 24	4.375	7.42535e-05	Up
AT5G22060.1	DNAJ homologue 2	100	1.06345e-16	Up
AT3G16530.1	Legume lectin family protein	3.064	0.0186398	Up
AT1G54630.1	acyl carrier protein 3	4.248	0.00312867	Up
AT4G27070.1	tryptophan synthase beta-subunit 2	9.739	1.07732e-05	Up
AT2G06050.1	oxophytodienoate-reductase 3	3.568	0.00301386	Up
AT5G60360.3	aleurain-like protease	3.712	0.00175547	Up
AT1G66100.1	Plant thionin	3.01	0.012227	Up
AT5G01600.1	ferretin 1	3.167	0.00770341	Up
AT1G73260.1	kunitz trypsin inhibitor 1	100	1.06345e-16	Up
AT1G09560.1	germin-like protein 5	4.117	0.000328179	Up
AT4G12600.1	Ribosomal protein L7Ae/L30e/S12e/Gadd45 family protein	10.329	1.37155e-07	Up
AT5G59320.1	lipid transfer protein 3	6.398	2.17036e-08	Up
AT2G15890.1	maternal effect embryo arrest 14	3.316	0.0182635	Up
AT3G44300.1	nitrilase 2	11.898	1.34579e-08	Up
AT1G02335.1	germin-like protein subfamily 2 member 2 precursor	100	1.06345e-16	Up
AT3G02230.1	reversibly glycosylated polypeptide 1	100	1.06345e-16	Up
AT1G48470.1	glutamine synthetase 1;5	100	1.06345e-16	Up
AT5G06870.1	polygalacturonase inhibiting protein 2	4.845	0.000312896	Up
AT4G25500.4	arginine/serine-rich splicing factor 35	100	1.06345e-16	Up
AT5G25540.1	CTC-interacting domain 6	4.864	0.000117758	Up
AT2G28760.1	UDP-XYL synthase 6	100	1.06345e-16	Up
AT5G23820.1	MD-2-related lipid recognition domain-containing protein	3.47	0.00373503	Up
AT5G20230.1	blue-copper-binding protein	100	1.06345e-16	Up
AT1G03870.1	FASCICLIN-like arabinoogalactan 9	3.092	0.0425392	Up
AT1G01490.2	Heavy metal transport/detoxification superfamily protein	3.324	0.0472689	Up
AT4G21830.1	methionine sulfoxide reductase B7	4.384	0.00105639	Up
AT4G01610.1	Cysteine proteinases superfamily protein	100	1.06345e-16	Up
AT1G09010.1	glycoside hydrolase family 2 protein	100	1.06345e-16	Up
AT1G63290.1	Aldolase-type TIM barrel family protein	13.882	7.83728e-09	Up
AT4G32930.2	unknown protein; FUNCTIONS IN: molecular_function unknown; INVOLVED IN: biological_process unknown; LOCATED IN: cellular_component unknown; EXPRESSED IN: 22 plant structures; EXPRESSED DURING: 13 growth stages; CONTAINS InterPro DOMAIN/s: Protein of unknown function DUF866, eukaryotic (InterPro:IPR008584).	3.241	0.00849296	Up
AT2G33740.2	Nitrogen regulatory PII-like, alpha/beta	11.344	2.39816e-12	Up
AT1G03350.1	BSD domain-containing protein	3.249	0.0457557	Up
AT1G09070.1	soybean gene regulated by cold-2	3.78	0.00423788	Up
AT1G14250.1	GDA1/CD39 nucleoside phosphatase family protein	100	1.06345e-16	Up
AT1G01790.1	K+ efflux antiporter 1	100	1.06345e-16	Up
AT2G42790.1	citrate synthase 3	100	1.06345e-16	Up
AT1G75030.1	thaumatin-like protein 3	100	1.06345e-16	Up
AT5G65770.2	little nuclei4	100	1.06345e-16	Up
AT1G19670.1	chlorophyllase 1	100	1.06345e-16	Up
AT3G50500.2	SNF1-related protein kinase 2.2	100	1.06345e-16	Up
AT4G16500.1	Cystatin/monellin superfamily protein	100	1.06345e-16	Up
AT2G45220.1	Plant invertase/pectin methylesterase inhibitor superfamily	100	1.06345e-16	Up
AT1G71310.2	cobalt ion binding	100	1.06345e-16	Up
AT3G04500.1	RNA-binding (RRM/RBD/RNP motifs) family protein	100	1.06345e-16	Up
AT4G33640.1	unknown protein; Has 30201 Blast hits to 17322 proteins in 780 species: Archae - 12; Bacteria - 1396; Metazoa - 17338; Fungi - 3422; Plants - 5037; Viruses - 0; Other Eukaryotes - 2996 (source: NCBI BLink).	100	1.06345e-16	Up
AT1G06210.1	ENTH/VHS/GAT family protein	100	1.06345e-16	Up
AT3G26340.1	N-terminal nucleophile aminohydrolases (Ntn hydrolases) superfamily protein	100	1.06345e-16	Up
AT4G37925.1	subunit NDH-M of NAD(P)H:plastoquinone dehydrogenase complex	9.042	2.572e-05	Up
AT1G23440.1	Peptidase C15, pyroglutamyl peptidase I-like	4.947	0.0014859	Up
AT4G04610.1	APS reductase 1	7.434	5.76708e-05	Up
AT1G48630.1	receptor for activated C kinase 1B	100	1.06345e-16	Up
AT5G15350.1	early nodulin-like protein 17	100	1.06345e-16	Up
AT5G52440.1	Bacterial sec-independent translocation protein mttA/Hcf106	9.14	8.17996e-06	Up
AT5G08080.3	syntaxin of plants 132	11.815	9.77109e-07	Up
AT5G54940.2	Translation initiation factor SUI1 family protein	100	1.06345e-16	Up
AT2G41410.1	Calcium-binding EF-hand family protein	100	1.06345e-16	Up
AT3G16050.1	pyridoxine biosynthesis 1.2	100	1.06345e-16	Up
AT4G15110.1	cytochrome P450, family 97, subfamily B, polypeptide 3	9.458	1.73427e-05	Up
AT1G24160.1	unknown protein; BEST Arabidopsis thaliana protein match is: unknown protein (TAIR:AT1G70100.3); Has 5230 Blast hits to 4162 proteins in 477 species: Archae - 30; Bacteria - 540; Metazoa - 2022; Fungi - 429; Plants - 280; Viruses - 32; Other Eukaryotes - 1897 (source: NCBI BLink).	100	1.06345e-16	Up
AT1G21600.2	plastid transcriptionally active 6	3.609	0.0229701	Up
AT3G45310.1	Cysteine proteinases superfamily protein	100	1.06345e-16	Up
AT5G48180.1	nitrile specifier protein 5	100	1.06345e-16	Up
AT2G43760.1	molybdopterin biosynthesis MoaE family protein	100	1.06345e-16	Up
AT2G16940.2	Splicing factor, CC1-like	100	1.06345e-16	Up
AT2G27920.1	serine carboxypeptidase-like 51	100	1.06345e-16	Up
AT2G29290.2	NAD(P)-binding Rossmann-fold superfamily protein	17.802	5.25361e-09	Up
AT1G72880.1	Survival protein SurE-like phosphatase/nucleotidase	100	1.06345e-16	Up
AT3G60450.1	Phosphoglycerate mutase family protein	100	1.06345e-16	Up
AT1G61690.1	phosphoinositide binding	100	1.06345e-16	Up
AT5G58110.1	chaperone binding;ATPase activators	100	1.06345e-16	Up
AT5G06410.1	DNAJ heat shock N-terminal domain-containing protein	100	1.06345e-16	Up
AT2G02990.1	ribonuclease 1	100	1.06345e-16	Up
AT4G29210.1	gamma-glutamyl transpeptidase 4	4.493	0.00815511	Up
AT2G06925.1	Phospholipase A2 family protein	100	1.06345e-16	Up
AT4G13340.1	Leucine-rich repeat (LRR) family protein	100	1.06345e-16	Up
AT1G31817.1	Ribosomal L18p/L5e family protein	100	1.06345e-16	Up
AT1G67865.1	unknown protein; BEST Arabidopsis thaliana protein match is: unknown protein (TAIR:AT1G67860.1); Has 13 Blast hits to 13 proteins in 2 species: Archae - 0; Bacteria - 0; Metazoa - 0; Fungi - 0; Plants - 13; Viruses - 0; Other Eukaryotes - 0 (source: NCBI BLink).	100	1.06345e-16	Up
AT1G70810.1	Calcium-dependent lipid-binding (CaLB domain) family protein	100	1.06345e-16	Up
AT1G25350.2	glutamine-tRNA ligase, putative / glutaminyl-tRNA synthetase, putative / GlnRS, putative	100	1.06345e-16	Up
AT1G21080.3	DNAJ heat shock N-terminal domain-containing protein	100	1.06345e-16	Up
AT2G31750.1	UDP-glucosyl transferase 74D1	7.262	4.28437e-05	Up
AT1G80050.1	adenine phosphoribosyl transferase 2	7.18	1.8684e-05	Up
AT3G09940.1	monodehydroascorbate reductase	100	1.06345e-16	Up
AT3G09970.1	Calcineurin-like metallo-phosphoesterase superfamily protein	100	1.06345e-16	Up
AT4G05090.1	Inositol monophosphatase family protein	100	1.06345e-16	Up
AT1G20580.1	Small nuclear ribonucleoprotein family protein	100	1.06345e-16	Up
AT1G79260.1	CONTAINS InterPro DOMAIN/s: Domain of unknown function DUF1794 (InterPro:IPR014878); Has 30201 Blast hits to 17322 proteins in 780 species: Archae - 12; Bacteria - 1396; Metazoa - 17338; Fungi - 3422; Plants - 5037; Viruses - 0; Other Eukaryotes - 2996 (source: NCBI BLink).	100	1.06345e-16	Up
AT2G43510.1	trypsin inhibitor protein 1	100	1.06345e-16	Up
AT3G10860.1	Cytochrome b-c1 complex, subunit 8 protein	100	1.06345e-16	Up
AT5G50210.1	quinolinate synthase	100	1.06345e-16	Up
AT4G17830.2	Peptidase M20/M25/M40 family protein	100	1.06345e-16	Up
AT1G11480.1	eukaryotic translation initiation factor-related	100	1.06345e-16	Up
AT1G72330.3	alanine aminotransferase 2	11.108	2.48202e-06	Up
AT3G21790.1	UDP-Glycosyltransferase superfamily protein	100	1.06345e-16	Up
AT5G14240.1	Thioredoxin superfamily protein	10.271	4.21569e-07	Up
AT1G58280.2	Phosphoglycerate mutase family protein	100	1.06345e-16	Up
AT1G76890.2	Duplicated homeodomain-like superfamily protein	100	1.06345e-16	Up
AT1G26390.1	FAD-binding Berberine family protein	100	1.06345e-16	Up
AT5G16780.1	SART-1 family	100	1.06345e-16	Up
AT5G53120.6	spermidine synthase 3	10.976	9.73036e-07	Up
AT2G36680.1	Modifier of rudimentary (Mod(r)) protein	100	1.06345e-16	Up
AT1G07960.1	PDI-like 5-1	100	1.06345e-16	Up
AT3G22600.1	Bifunctional inhibitor/lipid-transfer protein/seed storage 2S albumin superfamily protein	100	1.06345e-16	Up
AT5G24530.1	2-oxoglutarate (2OG) and Fe(II)-dependent oxygenase superfamily protein	100	1.06345e-16	Up
AT3G50520.1	Phosphoglycerate mutase family protein	100	1.06345e-16	Up
AT5G41220.1	glutathione S-transferase THETA 3	100	1.06345e-16	Up
AT1G19140.2	FUNCTIONS IN: molecular_function unknown; INVOLVED IN: ubiquinone biosynthetic process; LOCATED IN: mitochondrion; EXPRESSED IN: 24 plant structures; EXPRESSED DURING: 15 growth stages; CONTAINS InterPro DOMAIN/s: COQ9 (InterPro:IPR013718), Ubiquinone biosynthesis protein COQ9 (InterPro:IPR012762); Has 35333 Blast hits to 34131 proteins in 2444 species: Archae - 798; Bacteria - 22429; Metazoa - 9…	100	1.06345e-16	Up
AT3G23980.1	BLISTER	100	1.06345e-16	Up
AT5G64180.1	unknown protein; Has 1807 Blast hits to 1807 proteins in 277 species: Archae - 0; Bacteria - 0; Metazoa - 736; Fungi - 347; Plants - 385; Viruses - 0; Other Eukaryotes - 339 (source: NCBI BLink).	100	1.06345e-16	Up
AT2G39260.1	binding;RNA binding	100	1.06345e-16	Up
AT1G61040.1	plus-3 domain-containing protein	10.037	5.08434e-08	Up
AT5G24420.1	6-phosphogluconolactonase 5	100	1.06345e-16	Up
AT2G46540.1	unknown protein; FUNCTIONS IN: molecular_function unknown; INVOLVED IN: biological_process unknown; LOCATED IN: mitochondrion, membrane; EXPRESSED IN: 25 plant structures; EXPRESSED DURING: 16 growth stages; Has 42 Blast hits to 42 proteins in 11 species: Archae - 0; Bacteria - 0; Metazoa - 0; Fungi - 0; Plants - 42; Viruses - 0; Other Eukaryotes - 0 (source: NCBI BLink).	7.729	8.98165e-06	Up
AT5G03170.1	FASCICLIN-like arabinogalactan-protein 11	100	1.06345e-16	Up
AT5G60490.1	FASCICLIN-like arabinogalactan-protein 12	9.773	5.47558e-08	Up
AT3G43520.1	Transmembrane proteins 14C	8.465	2.31848e-05	Up
AT4G33350.1	Tic22-like family protein	4.16	0.0102549	Up
AT1G01940.1	Cyclophilin-like peptidyl-prolyl cis-trans isomerase family protein	100	1.06345e-16	Up
AT5G13010.1	RNA helicase family protein	5.35	1.07732e-05	Up
AT1G73840.1	hydroxyproline-rich glycoprotein family protein	100	1.06345e-16	Up
AT4G13180.1	NAD(P)-binding Rossmann-fold superfamily protein	10.711	4.87306e-07	Up
AT5G57550.1	xyloglucan endotransglucosylase/hydrolase 25	100	1.06345e-16	Up
AT1G63310.1	unknown protein; BEST Arabidopsis thaliana protein match is: unknown protein (TAIR:AT2G20362.1); Has 78 Blast hits to 77 proteins in 11 species: Archae - 0; Bacteria - 0; Metazoa - 0; Fungi - 0; Plants - 78; Viruses - 0; Other Eukaryotes - 0 (source: NCBI BLink).	3.369	0.0405332	Up
AT2G46600.1	Calcium-binding EF-hand family protein	100	1.06345e-16	Up
AT3G53180.1	glutamate-ammonia ligases;catalytics;glutamate-ammonia ligases	100	1.06345e-16	Up
AT3G19910.1	RING/U-box superfamily protein	100	1.06345e-16	Up
AT5G21090.1	Leucine-rich repeat (LRR) family protein	100	1.06345e-16	Up
AT1G23900.1	gamma-adaptin 1	100	1.06345e-16	Up
AT3G19950.1	RING/U-box superfamily protein	100	1.06345e-16	Up
AT5G15270.2	RNA-binding KH domain-containing protein	100	1.06345e-16	Up
AT1G65700.1	Small nuclear ribonucleoprotein family protein	12.435	8.69984e-07	Up
AT1G76730.1	NagB/RpiA/CoA transferase-like superfamily protein	100	1.06345e-16	Up

## Sheet: Day0
Table S4. List of differentially expressed proteins in different genotypes of Arabidopsis at day 0 of Pst DC3000 inoculation.
Accession	Description	Abundance Ratio: (0dpi-AtGAP1 overexpressor line A) / (0dpi-empty vector )	Abundance Ratio: (0dpi-AtGAP1 overexpressor line C) / (0dpi-empty vector )	Abundance Ratio Adj. P-Value: (0dpi-AtGAP1 overexpressor line A) / (0dpi-empty vector )	Abundance Ratio Adj. P-Value: (0dpi-AtGAP1 overexpressor line C) / (0dpi-empty vector )	Direction of change (Same for both comparison)	Direction of change (specific to either comparison)
AT3G23810.1	S-adenosyl-l-homocysteine (SAH) hydrolase 2	0.108	0.134	1.8656e-09	2.27277e-10	Down
AT1G64740.1	alpha-1 tubulin	0.01	0.01	7.85008e-17	8.31301e-17	Down
AT5G26742.1	DEAD box RNA helicase (RH3)	0.01	0.01	7.85008e-17	8.31301e-17	Down
AT5G49460.1	ATP citrate lyase subunit B 2	0.01	0.01	7.85008e-17	8.31301e-17	Down
AT4G27070.1	tryptophan synthase beta-subunit 2	0.107	0.01	0.000232732	8.31301e-17	Down
AT2G45300.1	RNA 3'-terminal phosphate cyclase/enolpyruvate transferase, alpha/beta	0.01	0.01	7.85008e-17	8.31301e-17	Down
AT1G76100.1	plastocyanin 1	0.171	0.266	7.67913e-13	7.73015e-09	Down
AT4G31480.2	Coatomer, beta subunit	0.148	0.127	2.09795e-05	1.3229e-08	Down
AT1G60950.1	2Fe-2S ferredoxin-like superfamily protein	0.01	0.01	7.85008e-17	8.31301e-17	Down
AT1G20693.1	high mobility group B2	0.114	0.01	8.5221e-06	8.31301e-17	Down
AT3G18000.1	S-adenosyl-L-methionine-dependent methyltransferases superfamily protein	0.01	0.01	7.85008e-17	8.31301e-17	Down
AT3G15790.1	methyl-CPG-binding domain 11	0.09	0.01	2.18518e-08	8.31301e-17	Down
AT1G76550.1	Phosphofructokinase family protein	0.01	0.01	7.85008e-17	8.31301e-17	Down
ATCG00350.1	Photosystem I, PsaA/PsaB protein	0.155	0.115	2.74192e-08	4.68496e-12	Down
AT4G00660.1	RNAhelicase-like 8	0.01	0.264	7.85008e-17	0.011179	Down
AT3G61240.2	DEA(D/H)-box RNA helicase family protein	0.01	0.01	7.85008e-17	8.31301e-17	Down
AT1G08200.1	UDP-D-apiose/UDP-D-xylose synthase 2	0.01	0.01	7.85008e-17	8.31301e-17	Down
AT1G04170.1	eukaryotic translation initiation factor 2 gamma subunit	0.309	0.329	0.0300609	0.0333449	Down
AT5G16620.1	hydroxyproline-rich glycoprotein family protein	0.01	0.01	7.85008e-17	8.31301e-17	Down
AT1G19870.1	IQ-domain 32	0.1	0.116	1.53831e-05	3.92224e-06	Down
AT4G03120.1	C2H2 and C2HC zinc fingers superfamily protein	0.01	0.01	7.85008e-17	8.31301e-17	Down
AT4G17890.1	ARF-GAP domain 8	0.01	0.107	7.85008e-17	1.28894e-06	Down
AT2G46290.1	Transducin/WD40 repeat-like superfamily protein	0.01	0.01	7.85008e-17	8.31301e-17	Down
AT4G37520.1	Peroxidase superfamily protein	0.083	0.01	2.01361e-06	8.31301e-17	Down
AT3G63410.1	S-adenosyl-L-methionine-dependent methyltransferases superfamily protein	0.01	0.01	7.85008e-17	8.31301e-17	Down
AT4G39080.1	vacuolar proton ATPase A3	0.01	0.01	7.85008e-17	8.31301e-17	Down
AT5G66550.1	Maf-like protein	0.01	0.01	7.85008e-17	8.31301e-17	Down
AT2G33590.1	NAD(P)-binding Rossmann-fold superfamily protein	0.19	0.266	0.00119043	0.0172361	Down
AT5G05590.1	phosphoribosylanthranilate isomerase 2	0.01	0.01	7.85008e-17	8.31301e-17	Down
AT1G71730.1	unknown protein; Has 52 Blast hits to 52 proteins in 24 species: Archae - 0; Bacteria - 0; Metazoa - 4; Fungi - 0; Plants - 41; Viruses - 0; Other Eukaryotes - 7 (source: NCBI BLink).	0.01	0.094	7.85008e-17	9.94422e-07	Down
AT5G64260.1	EXORDIUM like 2	0.01	0.01	7.85008e-17	8.31301e-17	Down
AT4G28100.1	unknown protein; FUNCTIONS IN: molecular_function unknown; INVOLVED IN: biological_process unknown; LOCATED IN: anchored to plasma membrane, anchored to membrane; EXPRESSED IN: 23 plant structures; EXPRESSED DURING: 14 growth stages; BEST Arabidopsis thaliana protein match is: unknown protein (TAIR:AT3G18050.1); Has 30201 Blast hits to 17322 proteins in 780 species: Archae - 12; Bacteria - 1396; …	0.01	0.01	7.85008e-17	8.31301e-17	Down
AT1G31230.1	aspartate kinase-homoserine dehydrogenase i	0.01	0.01	7.85008e-17	8.31301e-17	Down
AT1G15750.1	Transducin family protein / WD-40 repeat family protein	0.01	0.079	7.85008e-17	3.16912e-08	Down
AT2G45240.1	methionine aminopeptidase 1A	0.01	0.01	7.85008e-17	8.31301e-17	Down
AT1G02080.1	transcription regulators	0.01	0.01	7.85008e-17	8.31301e-17	Down
AT3G27310.1	plant UBX domain-containing protein 1	0.01	0.113	7.85008e-17	1.84291e-05	Down
AT2G36230.1	Aldolase-type TIM barrel family protein	0.264	0.01	0.0128546	8.31301e-17	Down
AT4G36800.1	RUB1 conjugating enzyme 1	0.01	0.01	7.85008e-17	8.31301e-17	Down
AT5G64370.1	beta-ureidopropionase	0.01	0.135	7.85008e-17	4.67902e-05	Down
AT4G31420.2	Zinc finger protein 622	0.01	0.01	7.85008e-17	8.31301e-17	Down
AT4G04610.1	APS reductase 1	0.01	0.01	7.85008e-17	8.31301e-17	Down
AT1G53165.3	Protein kinase superfamily protein	0.01	0.01	7.85008e-17	8.31301e-17	Down
AT1G64330.1	myosin heavy chain-related	0.01	0.01	7.85008e-17	8.31301e-17	Down
AT1G70310.1	spermidine synthase 2	0.077	0.01	1.2004e-05	8.31301e-17	Down
AT3G48330.1	protein-l-isoaspartate methyltransferase 1	0.01	0.01	7.85008e-17	8.31301e-17	Down
AT2G23610.1	methyl esterase 3	0.01	0.01	7.85008e-17	8.31301e-17	Down
AT5G08000.1	glucan endo-1,3-beta-glucosidase-like protein 3	0.01	0.01	7.85008e-17	8.31301e-17	Down
AT3G48670.1	XH/XS domain-containing protein	0.01	0.01	7.85008e-17	8.31301e-17	Down
AT2G22360.1	DNAJ heat shock family protein	0.01	0.01	7.85008e-17	8.31301e-17	Down
AT1G48110.2	evolutionarily conserved C-terminal region 7	0.01	0.01	7.85008e-17	8.31301e-17	Down
AT4G10750.1	Phosphoenolpyruvate carboxylase family protein	0.01	0.01	7.85008e-17	8.31301e-17	Down
AT5G47480.1	RGPR-related	0.01	0.01	7.85008e-17	8.31301e-17	Down
AT2G43820.1	UDP-glucosyltransferase 74F2	0.01	0.01	7.85008e-17	8.31301e-17	Down
AT5G17020.1	exportin 1A	0.01	0.01	7.85008e-17	8.31301e-17	Down
AT2G42500.1	protein phosphatase 2A-3	0.01	0.01	7.85008e-17	8.31301e-17	Down
AT4G08950.1	Phosphate-responsive 1 family protein	0.01	0.01	7.85008e-17	8.31301e-17	Down
AT3G49720.1	unknown protein; FUNCTIONS IN: molecular_function unknown; INVOLVED IN: biological_process unknown; LOCATED IN: chloroplast thylakoid membrane, Golgi apparatus, plasma membrane, membrane; EXPRESSED IN: 25 plant structures; EXPRESSED DURING: 15 growth stages; BEST Arabidopsis thaliana protein match is: unknown protein (TAIR:AT5G65810.1); Has 64 Blast hits to 64 proteins in 11 species: Archae - 0; …	0.01	0.01	7.85008e-17	8.31301e-17	Down
AT2G29540.3	RNApolymerase 14 kDa subunit	0.01	0.01	7.85008e-17	8.31301e-17	Down
AT3G02200.2	Proteasome component (PCI) domain protein	0.01	0.01	7.85008e-17	8.31301e-17	Down
AT3G47560.2	alpha/beta-Hydrolases superfamily protein	0.084	0.01	1.32764e-07	8.31301e-17	Down
AT5G25610.1	BURP domain-containing protein	0.01	0.01	7.85008e-17	8.31301e-17	Down
AT1G21250.1	cell wall-associated kinase	0.01	0.01	7.85008e-17	8.31301e-17	Down
AT2G13540.1	ARM repeat superfamily protein	0.01	0.01	7.85008e-17	8.31301e-17	Down
AT1G01160.2	GRF1-interacting factor 2	0.01	0.01	7.85008e-17	8.31301e-17	Down
AT5G47770.1	farnesyl diphosphate synthase 1	0.01	0.01	7.85008e-17	8.31301e-17	Down
AT1G22430.1	GroES-like zinc-binding dehydrogenase family protein	0.01	0.01	7.85008e-17	8.31301e-17	Down
AT3G20810.1	2-oxoglutarate (2OG) and Fe(II)-dependent oxygenase superfamily protein	0.01	0.01	7.85008e-17	8.31301e-17	Down
AT5G25754.1	RNA polymerase I-associated factor PAF67	0.01	0.01	7.85008e-17	8.31301e-17	Down
AT1G22520.2	Domain of unknown function (DUF543)	0.01	0.01	7.85008e-17	8.31301e-17	Down
AT4G36810.1	geranylgeranyl pyrophosphate synthase 1	0.01	0.01	7.85008e-17	8.31301e-17	Down
AT2G27170.2	Structural maintenance of chromosomes (SMC) family protein	0.01	0.01	7.85008e-17	8.31301e-17	Down
AT4G15900.1	pleiotropic regulatory locus 1	0.01	0.01	7.85008e-17	8.31301e-17	Down
AT4G09020.1	isoamylase 3	0.01	0.01	7.85008e-17	8.31301e-17	Down
AT5G09850.1	Transcription elongation factor (TFIIS) family protein	0.01	0.01	7.85008e-17	8.31301e-17	Down
AT1G15130.1	Endosomal targeting BRO1-like domain-containing protein	0.01	0.01	7.85008e-17	8.31301e-17	Down
AT3G25690.2	Hydroxyproline-rich glycoprotein family protein	0.01	0.01	7.85008e-17	8.31301e-17	Down
ATCG00710.1	photosystem II reaction center protein H	0.01	0.01	7.85008e-17	8.31301e-17	Down
AT2G43770.1	Transducin/WD40 repeat-like superfamily protein	0.01	0.01	7.85008e-17	8.31301e-17	Down
AT1G15690.1	Inorganic H pyrophosphatase family protein	0.136	0.203	0.000169121	0.00210207	Down
AT2G24850.1	tyrosine aminotransferase 3	0.01	0.01	7.85008e-17	8.31301e-17	Down
AT3G17880.1	tetraticopeptide domain-containing thioredoxin	0.01	0.01	7.85008e-17	8.31301e-17	Down
AT1G69200.1	fructokinase-like 2	0.01	0.01	7.85008e-17	8.31301e-17	Down
AT3G19820.3	cell elongation protein / DWARF1 / DIMINUTO (DIM)	0.01	0.01	7.85008e-17	8.31301e-17	Down
AT5G37830.1	oxoprolinase 1	0.01	0.01	7.85008e-17	8.31301e-17	Down
AT3G11200.1	alfin-like 2	0.01	0.01	7.85008e-17	8.31301e-17	Down
AT3G09260.1	Glycosyl hydrolase superfamily protein	0.01	0.01	7.85008e-17	8.31301e-17	Down
AT1G14570.1	UBX domain-containing protein	0.01	0.01	7.85008e-17	8.31301e-17	Down
AT3G52400.1	syntaxin of plants 122	0.147	0.01	0.000381219	8.31301e-17	Down
AT2G27210.1	BRI1 suppressor 1 (BSU1)-like 3	0.01	0.01	7.85008e-17	8.31301e-17	Down
AT1G71230.1	COP9-signalosome 5B	0.172	0.2	0.000388497	0.00195983	Down
AT1G64500.1	Glutaredoxin family protein	0.01	0.01	7.85008e-17	8.31301e-17	Down
AT5G53000.1	2A phosphatase associated protein of 46 kD	0.01	0.01	7.85008e-17	8.31301e-17	Down
AT5G66470.1	RNA binding;GTP binding	0.185	0.18	0.000259839	0.000162813	Down
AT5G63190.1	MA3 domain-containing protein	0.01	0.01	7.85008e-17	8.31301e-17	Down
AT2G42690.1	alpha/beta-Hydrolases superfamily protein	0.01	0.01	7.85008e-17	8.31301e-17	Down
AT2G29690.1	anthranilate synthase 2	0.01	0.01	7.85008e-17	8.31301e-17	Down
AT1G21640.2	NAD kinase 2	0.133	0.01	4.61031e-05	8.31301e-17	Down
AT3G53420.1	plasma membrane intrinsic protein 2A	0.294	0.29	0.0147304	0.00343355	Down
AT3G20630.1	ubiquitin-specific protease 14	0.01	0.01	7.85008e-17	8.31301e-17	Down
AT2G44790.1	uclacyanin 2	0.01	0.01	7.85008e-17	8.31301e-17	Down
AT5G19855.1	Chaperonin-like RbcX protein	0.01	0.01	7.85008e-17	8.31301e-17	Down
AT1G73460.1	Protein kinase superfamily protein	0.01	0.01	7.85008e-17	8.31301e-17	Down
AT3G12080.1	GTP-binding family protein	0.01	0.01	7.85008e-17	8.31301e-17	Down
AT4G14570.1	acylaminoacyl-peptidase-related	0.01	0.117	7.85008e-17	6.53005e-06	Down
AT5G14170.1	SWIB/MDM2 domain superfamily protein	0.01	0.01	7.85008e-17	8.31301e-17	Down
AT2G38560.1	transcript elongation factor IIS	0.01	0.01	7.85008e-17	8.31301e-17	Down
AT4G04910.1	AAA-type ATPase family protein	0.01	0.01	7.85008e-17	8.31301e-17	Down
AT4G30220.2	small nuclear ribonucleoprotein F	0.01	0.01	7.85008e-17	8.31301e-17	Down
AT4G20930.1	6-phosphogluconate dehydrogenase family protein	0.01	0.113	7.85008e-17	4.02479e-06	Down
AT5G38830.1	Cysteinyl-tRNA synthetase, class Ia family protein	0.01	0.01	7.85008e-17	8.31301e-17	Down
AT1G32580.1	plastid developmental protein DAG, putative	0.01	0.01	7.85008e-17	8.31301e-17	Down
AT5G02270.2	non-intrinsic ABC protein 9	0.01	0.01	7.85008e-17	8.31301e-17	Down
AT2G23420.1	nicotinate phosphoribosyltransferase 2	0.01	0.01	7.85008e-17	8.31301e-17	Down
AT2G25430.1	epsin N-terminal homology (ENTH) domain-containing protein / clathrin assembly protein-related	0.01	0.01	7.85008e-17	8.31301e-17	Down
AT1G76850.1	exocyst complex component sec5	0.01	0.01	7.85008e-17	8.31301e-17	Down
AT1G69840.7	SPFH/Band 7/PHB domain-containing membrane-associated protein family	0.01	0.01	7.85008e-17	8.31301e-17	Down
AT2G13440.1	glucose-inhibited division family A protein	0.01	0.096	7.85008e-17	4.07157e-06	Down
AT3G48710.1	DEK domain-containing chromatin associated protein	0.01	0.01	7.85008e-17	8.31301e-17	Down
AT2G24390.1	AIG2-like (avirulence induced gene) family protein	0.01	0.01	7.85008e-17	8.31301e-17	Down
AT1G07440.1	NAD(P)-binding Rossmann-fold superfamily protein	0.01	0.01	7.85008e-17	8.31301e-17	Down
AT4G13550.1	triglyceride lipases;triglyceride lipases	0.01	0.01	7.85008e-17	8.31301e-17	Down
AT1G04350.1	2-oxoglutarate (2OG) and Fe(II)-dependent oxygenase superfamily protein	0.01	0.01	7.85008e-17	8.31301e-17	Down
AT3G01090.2	SNF1 kinase homolog 10	0.01	0.01	7.85008e-17	8.31301e-17	Down
AT3G12610.1	Leucine-rich repeat (LRR) family protein	0.01	0.19	7.85008e-17	4.83841e-05	Down
AT5G25100.2	Endomembrane protein 70 protein family	0.01	0.01	7.85008e-17	8.31301e-17	Down
AT1G01960.1	SEC7-like guanine nucleotide exchange family protein	0.01	0.01	7.85008e-17	8.31301e-17	Down
AT1G13990.3	unknown protein; FUNCTIONS IN: molecular_function unknown; INVOLVED IN: biological_process unknown; LOCATED IN: chloroplast; EXPRESSED IN: 23 plant structures; EXPRESSED DURING: 13 growth stages; CONTAINS InterPro DOMAIN/s: Protein of unknown function DUF3110 (InterPro:IPR021503); Has 4 Blast hits to 4 proteins in 1 species: Archae - 0; Bacteria - 0; Metazoa - 0; Fungi - 0; Plants - 4; Viruses - …	0.01	0.01	7.85008e-17	8.31301e-17	Down
AT1G02140.1	mago nashi family protein	0.01	0.01	7.85008e-17	8.31301e-17	Down
AT1G61010.2	cleavage and polyadenylation specificity factor 73-I	0.01	0.01	7.85008e-17	8.31301e-17	Down
AT4G31720.2	TBP-associated factor II 15	0.01	0.01	7.85008e-17	8.31301e-17	Down
AT5G23280.1	TCP family transcription factor	0.01	0.01	7.85008e-17	8.31301e-17	Down
AT2G03150.1	ATP/GTP-binding protein family	0.102	0.103	6.85134e-05	1.24536e-06	Down
AT5G62390.1	BCL-2-associated athanogene 7	0.01	0.01	7.85008e-17	8.31301e-17	Down
AT4G13180.1	NAD(P)-binding Rossmann-fold superfamily protein	0.01	0.01	7.85008e-17	8.31301e-17	Down
AT4G23630.1	VIRB2-interacting protein 1	0.01	0.01	7.85008e-17	8.31301e-17	Down
AT1G63310.1	unknown protein; BEST Arabidopsis thaliana protein match is: unknown protein (TAIR:AT2G20362.1); Has 78 Blast hits to 77 proteins in 11 species: Archae - 0; Bacteria - 0; Metazoa - 0; Fungi - 0; Plants - 78; Viruses - 0; Other Eukaryotes - 0 (source: NCBI BLink).	0.01	0.01	7.85008e-17	8.31301e-17	Down
AT5G05210.1	Surfeit locus protein 6	0.01	0.01	7.85008e-17	8.31301e-17	Down
AT4G14320.2	Zinc-binding ribosomal protein family protein	0.017	0.01	4.38961e-13	8.31301e-17	Down
AT2G38360.1	prenylated RAB acceptor 1.B4	0.01	0.01	7.85008e-17	8.31301e-17	Down
AT1G79380.1	Ca(2)-dependent phospholipid-binding protein (Copine) family	0.01	0.01	7.85008e-17	8.31301e-17	Down
AT5G58390.1	Peroxidase superfamily protein	0.01	0.01	7.85008e-17	8.31301e-17	Down
AT4G26100.1	casein kinase 1	0.01	0.01	7.85008e-17	8.31301e-17	Down
AT3G57810.3	Cysteine proteinases superfamily protein	0.01	0.01	7.85008e-17	8.31301e-17	Down
AT5G54855.1	Pollen Ole e 1 allergen and extensin family protein	0.01	0.01	7.85008e-17	8.31301e-17	Down
AT2G46140.1	Late embryogenesis abundant protein	0.01	0.01	7.85008e-17	8.31301e-17	Down
AT4G13770.1	cytochrome P450, family 83, subfamily A, polypeptide 1	0.01	0.01	7.85008e-17	8.31301e-17	Down
AT1G23205.1	Plant invertase/pectin methylesterase inhibitor superfamily protein	0.01	0.01	7.85008e-17	8.31301e-17	Down
AT5G54440.1	CLUB	0.01	0.01	7.85008e-17	8.31301e-17	Down
AT3G29200.1	chorismate mutase 1	0.01	0.01	7.85008e-17	8.31301e-17	Down
AT3G10740.1	alpha-L-arabinofuranosidase 1	0.01	0.01	7.85008e-17	8.31301e-17	Down
AT4G18060.1	SH3 domain-containing protein	0.01	0.01	7.85008e-17	8.31301e-17	Down
AT3G12400.1	Ubiquitin-conjugating enzyme/RWD-like protein	0.089	0.01	5.87169e-05	8.31301e-17	Down
AT2G27040.1	Argonaute family protein	0.121	0.01	5.74355e-06	8.31301e-17	Down
AT2G33220.1	GRIM-19 protein	0.01	0.01	7.85008e-17	8.31301e-17	Down
AT4G30270.1	xyloglucan endotransglucosylase/hydrolase 24	3.799	4.024	9.76996e-05	7.84768e-06	Up
AT5G22060.1	DNAJ homologue 2	100	100	7.85008e-17	8.31301e-17	Up
AT4G29160.3	SNF7 family protein	3.04	3.015	0.0152154	0.0055948	Up
AT1G09560.1	germin-like protein 5	4.081	4.479	0.000402654	3.13678e-05	Up
AT5G42180.1	Peroxidase superfamily protein	4.886	10.19	0.0252084	3.53288e-06	Up
AT5G52200.2	phosphoprotein phosphatase inhibitors	7.889	5.4	4.44166e-05	0.000130145	Up
AT5G52640.1	heat shock protein 90.1	100	100	7.85008e-17	8.31301e-17	Up
AT1G02335.1	germin-like protein subfamily 2 member 2 precursor	100	100	7.85008e-17	8.31301e-17	Up
AT4G25500.4	arginine/serine-rich splicing factor 35	100	100	7.85008e-17	8.31301e-17	Up
AT2G27730.1	copper ion binding	4.577	4.216	4.23933e-06	0.00229084	Up
AT3G60190.1	DYNAMIN-like 1E	17.041	8.941	3.11112e-08	5.09666e-05	Up
AT3G59870.1	unknown protein; FUNCTIONS IN: molecular_function unknown; INVOLVED IN: biological_process unknown; LOCATED IN: chloroplast; EXPRESSED IN: 23 plant structures; EXPRESSED DURING: 13 growth stages; BEST Arabidopsis thaliana protein match is: unknown protein (TAIR:AT2G43945.1); Has 292 Blast hits to 292 proteins in 84 species: Archae - 0; Bacteria - 122; Metazoa - 0; Fungi - 0; Plants - 46; Viruses …	100	100	7.85008e-17	8.31301e-17	Up
AT5G20230.1	blue-copper-binding protein	100	100	7.85008e-17	8.31301e-17	Up
AT2G30410.2	tubulin folding cofactor A (KIESEL)	4.272	3.748	0.00699928	0.00758572	Up
AT1G06690.1	NAD(P)-linked oxidoreductase superfamily protein	4.145	3.842	0.0120696	0.00572791	Up
AT5G22580.1	Stress responsive A/B Barrel Domain	13.496	11.494	6.92025e-10	5.06323e-10	Up
AT4G32930.2	unknown protein; FUNCTIONS IN: molecular_function unknown; INVOLVED IN: biological_process unknown; LOCATED IN: cellular_component unknown; EXPRESSED IN: 22 plant structures; EXPRESSED DURING: 13 growth stages; CONTAINS InterPro DOMAIN/s: Protein of unknown function DUF866, eukaryotic (InterPro:IPR008584).	3.038	4.086	0.0243271	6.77308e-05	Up
AT1G01790.1	K+ efflux antiporter 1	100	7.478	7.85008e-17	8.42754e-05	Up
AT1G75030.1	thaumatin-like protein 3	100	11.382	7.85008e-17	4.6507e-07	Up
AT4G17050.1	ureidoglycine aminohydrolase	100	100	7.85008e-17	8.31301e-17	Up
AT5G65770.2	little nuclei4	100	100	7.85008e-17	8.31301e-17	Up
AT3G50500.2	SNF1-related protein kinase 2.2	100	11.125	7.85008e-17	1.21341e-05	Up
AT4G16500.1	Cystatin/monellin superfamily protein	100	100	7.85008e-17	8.31301e-17	Up
AT1G71310.2	cobalt ion binding	100	100	7.85008e-17	8.31301e-17	Up
AT3G04500.1	RNA-binding (RRM/RBD/RNP motifs) family protein	5.475	8.121	0.00821324	0.000284497	Up
AT4G33640.1	unknown protein; Has 30201 Blast hits to 17322 proteins in 780 species: Archae - 12; Bacteria - 1396; Metazoa - 17338; Fungi - 3422; Plants - 5037; Viruses - 0; Other Eukaryotes - 2996 (source: NCBI BLink).	100	100	7.85008e-17	8.31301e-17	Up
AT1G06210.1	ENTH/VHS/GAT family protein	100	100	7.85008e-17	8.31301e-17	Up
AT1G03030.1	P-loop containing nucleoside triphosphate hydrolases superfamily protein	100	100	7.85008e-17	8.31301e-17	Up
AT1G48630.1	receptor for activated C kinase 1B	100	100	7.85008e-17	8.31301e-17	Up
AT5G15350.1	early nodulin-like protein 17	100	100	7.85008e-17	8.31301e-17	Up
AT5G47030.1	ATPase, F1 complex, delta/epsilon subunit	3.681	3.136	0.00015233	0.000442776	Up
AT3G16050.1	pyridoxine biosynthesis 1.2	100	100	7.85008e-17	8.31301e-17	Up
AT1G06640.1	2-oxoglutarate (2OG) and Fe(II)-dependent oxygenase superfamily protein	13.663	15.322	6.18284e-13	4.70216e-13	Up
AT4G14160.1	Sec23/Sec24 protein transport family protein	100	100	7.85008e-17	8.31301e-17	Up
AT1G55260.1	Bifunctional inhibitor/lipid-transfer protein/seed storage 2S albumin superfamily protein	5.352	5.079	8.75282e-07	9.06858e-08	Up
AT4G15110.1	cytochrome P450, family 97, subfamily B, polypeptide 3	100	100	7.85008e-17	8.31301e-17	Up
AT5G21160.3	LA RNA-binding protein	100	10.167	7.85008e-17	4.12069e-05	Up
AT2G16940.2	Splicing factor, CC1-like	100	100	7.85008e-17	8.31301e-17	Up
AT2G20690.1	lumazine-binding family protein	4.01	3.186	6.63189e-07	7.10005e-05	Up
AT1G72880.1	Survival protein SurE-like phosphatase/nucleotidase	100	100	7.85008e-17	8.31301e-17	Up
AT5G58110.1	chaperone binding;ATPase activators	100	100	7.85008e-17	8.31301e-17	Up
AT1G64880.1	Ribosomal protein S5 family protein	4.386	4.559	2.91595e-05	9.12335e-07	Up
AT2G06925.1	Phospholipase A2 family protein	100	100	7.85008e-17	8.31301e-17	Up
AT4G13340.1	Leucine-rich repeat (LRR) family protein	100	100	7.85008e-17	8.31301e-17	Up
AT4G21585.1	endonuclease 4	100	12.252	7.85008e-17	2.58981e-07	Up
ATCG01020.1	ribosomal protein L32	4.712	5.039	3.24048e-06	1.4672e-07	Up
AT2G31750.1	UDP-glucosyl transferase 74D1	100	9.545	7.85008e-17	4.10727e-05	Up
AT3G57320.1	unknown protein; Has 30 Blast hits to 30 proteins in 13 species: Archae - 0; Bacteria - 0; Metazoa - 2; Fungi - 0; Plants - 28; Viruses - 0; Other Eukaryotes - 0 (source: NCBI BLink).	100	100	7.85008e-17	8.31301e-17	Up
AT1G79260.1	CONTAINS InterPro DOMAIN/s: Domain of unknown function DUF1794 (InterPro:IPR014878); Has 30201 Blast hits to 17322 proteins in 780 species: Archae - 12; Bacteria - 1396; Metazoa - 17338; Fungi - 3422; Plants - 5037; Viruses - 0; Other Eukaryotes - 2996 (source: NCBI BLink).	100	100	7.85008e-17	8.31301e-17	Up
AT1G26750.1	unknown protein; Has 44 Blast hits to 44 proteins in 16 species: Archae - 0; Bacteria - 0; Metazoa - 0; Fungi - 0; Plants - 44; Viruses - 0; Other Eukaryotes - 0 (source: NCBI BLink).	100	100	7.85008e-17	8.31301e-17	Up
AT2G28900.1	outer plastid envelope protein 16-1	100	100	7.85008e-17	8.31301e-17	Up
AT3G62140.1	CONTAINS InterPro DOMAIN/s: NEFA-interacting nuclear protein NIP30, N-terminal (InterPro:IPR019331); Has 398 Blast hits to 395 proteins in 139 species: Archae - 0; Bacteria - 6; Metazoa - 193; Fungi - 83; Plants - 36; Viruses - 0; Other Eukaryotes - 80 (source: NCBI BLink).	100	100	7.85008e-17	8.31301e-17	Up
AT3G10860.1	Cytochrome b-c1 complex, subunit 8 protein	100	100	7.85008e-17	8.31301e-17	Up
AT2G44200.1	CBF1-interacting co-repressor CIR, N-terminal;Pre-mRNA splicing factor	34.346	100	7.12182e-13	8.31301e-17	Up
AT4G17830.2	Peptidase M20/M25/M40 family protein	100	100	7.85008e-17	8.31301e-17	Up
AT1G11480.1	eukaryotic translation initiation factor-related	10.548	100	1.4658e-05	8.31301e-17	Up
AT5G19110.1	Eukaryotic aspartyl protease family protein	100	100	7.85008e-17	8.31301e-17	Up
AT3G21790.1	UDP-Glycosyltransferase superfamily protein	100	9.367	7.85008e-17	2.29639e-06	Up
AT5G14240.1	Thioredoxin superfamily protein	100	100	7.85008e-17	8.31301e-17	Up
ATCG00770.1	ribosomal protein S8	100	100	7.85008e-17	8.31301e-17	Up
AT2G36680.1	Modifier of rudimentary (Mod(r)) protein	100	100	7.85008e-17	8.31301e-17	Up
ATCG00020.1	photosystem II reaction center protein A	100	100	7.85008e-17	8.31301e-17	Up
AT4G02720.1	unknown protein; FUNCTIONS IN: molecular_function unknown; INVOLVED IN: biological_process unknown; EXPRESSED IN: 25 plant structures; EXPRESSED DURING: 14 growth stages; CONTAINS InterPro DOMAIN/s: Protein of unknown function DUF926 (InterPro:IPR009269); Has 30201 Blast hits to 17322 proteins in 780 species: Archae - 12; Bacteria - 1396; Metazoa - 17338; Fungi - 3422; Plants - 5037; Viruses - 0;…	100	100	7.85008e-17	8.31301e-17	Up
AT5G23395.1	Cox19-like CHCH family protein	100	100	7.85008e-17	8.31301e-17	Up
AT5G64180.1	unknown protein; Has 1807 Blast hits to 1807 proteins in 277 species: Archae - 0; Bacteria - 0; Metazoa - 736; Fungi - 347; Plants - 385; Viruses - 0; Other Eukaryotes - 339 (source: NCBI BLink).	100	100	7.85008e-17	8.31301e-17	Up
AT2G39260.1	binding;RNA binding	100	100	7.85008e-17	8.31301e-17	Up
AT5G03170.1	FASCICLIN-like arabinogalactan-protein 11	100	100	7.85008e-17	8.31301e-17	Up
AT1G01940.1	Cyclophilin-like peptidyl-prolyl cis-trans isomerase family protein	100	100	7.85008e-17	8.31301e-17	Up
AT1G73840.1	hydroxyproline-rich glycoprotein family protein	100	100	7.85008e-17	8.31301e-17	Up
AT5G57550.1	xyloglucan endotransglucosylase/hydrolase 25	100	100	7.85008e-17	8.31301e-17	Up
AT5G46160.1	Ribosomal protein L14p/L23e family protein	100	100	7.85008e-17	8.31301e-17	Up
AT3G07670.1	Rubisco methyltransferase family protein	100	11.42	7.85008e-17	3.47994e-06	Up
AT4G21980.2	Ubiquitin-like superfamily protein	100	14.23	7.85008e-17	2.26447e-08	Up
AT4G32605.1	Mitochondrial glycoprotein family protein	100	100	7.85008e-17	8.31301e-17	Up
AT5G56170.1	LORELEI-LIKE-GPI-ANCHORED PROTEIN 1	100	100	7.85008e-17	8.31301e-17	Up
AT3G55520.1	FKBP-like peptidyl-prolyl cis-trans isomerase family protein	100	100	7.85008e-17	8.31301e-17	Up
AT5G56140.1	RNA-binding KH domain-containing protein	4.699	3.986	0.0253981	0.0152126	Up
AT1G01900.1	subtilase family protein	100	100	7.85008e-17	8.31301e-17	Up
AT2G47580.1	spliceosomal protein U1A	3.588	3.016	7.64996e-06	0.000127692	Up
AT2G36145.1	unknown protein; FUNCTIONS IN: molecular_function unknown; INVOLVED IN: biological_process unknown; LOCATED IN: chloroplast thylakoid membrane, chloroplast stroma, chloroplast; EXPRESSED IN: 19 plant structures; EXPRESSED DURING: 13 growth stages; Has 49 Blast hits to 49 proteins in 17 species: Archae - 0; Bacteria - 0; Metazoa - 0; Fungi - 0; Plants - 49; Viruses - 0; Other Eukaryotes - 0 (sourc…	6.049	5.143	0.000636151	0.000305407	Up
AT4G18905.2	Transducin/WD40 repeat-like superfamily protein	7.631	6.426	4.47544e-05	0.000148841	Up
AT3G19950.1	RING/U-box superfamily protein	100	100	7.85008e-17	8.31301e-17	Up
AT5G15270.2	RNA-binding KH domain-containing protein	100	100	7.85008e-17	8.31301e-17	Up
AT1G19000.1	Homeodomain-like superfamily protein	100	100	7.85008e-17	8.31301e-17	Up
AT5G23860.2	tubulin beta 8	0.01	0.818	7.85008e-17	0.856772		Down for (0dpi-AtGAP1 overexpressor line A) / (0dpi-empty vector )
AT1G75040.1	pathogenesis-related gene 5	0.32	0.387	1.15917e-06	5.06301e-05		Down for (0dpi-AtGAP1 overexpressor line A) / (0dpi-empty vector )
AT3G52750.1	Tubulin/FtsZ family protein	0.01	1.402	7.85008e-17	0.851747		Down for (0dpi-AtGAP1 overexpressor line A) / (0dpi-empty vector )
AT5G15490.1	UDP-glucose 6-dehydrogenase family protein	0.01	0.935	7.85008e-17	0.92634		Down for (0dpi-AtGAP1 overexpressor line A) / (0dpi-empty vector )
AT5G45280.2	Pectinacetylesterase family protein	0.33	0.448	0.0384484	0.0668317		Down for (0dpi-AtGAP1 overexpressor line A) / (0dpi-empty vector )
AT5G14540.1	Protein of unknown function (DUF1421)	0.138	1.019	1.56414e-05	0.985897		Down for (0dpi-AtGAP1 overexpressor line A) / (0dpi-empty vector )
ATCG00680.1	photosystem II reaction center protein B	0.309	0.381	0.028918	0.0677465		Down for (0dpi-AtGAP1 overexpressor line A) / (0dpi-empty vector )
AT4G01370.1	MAP kinase 4	0.01	0.816	7.85008e-17	0.866638		Down for (0dpi-AtGAP1 overexpressor line A) / (0dpi-empty vector )
AT3G52920.2	Family of unknown function (DUF662)	0.096	2.478	8.81257e-05	0.248471		Down for (0dpi-AtGAP1 overexpressor line A) / (0dpi-empty vector )
AT1G74260.1	purine biosynthesis 4	0.01	0.416	7.85008e-17	0.217407		Down for (0dpi-AtGAP1 overexpressor line A) / (0dpi-empty vector )
AT4G00490.1	beta-amylase 2	0.01	1.011	7.85008e-17	0.971153		Down for (0dpi-AtGAP1 overexpressor line A) / (0dpi-empty vector )
AT1G22410.1	Class-II DAHP synthetase family protein	0.01	1.413	7.85008e-17	0.891784		Down for (0dpi-AtGAP1 overexpressor line A) / (0dpi-empty vector )
AT3G19450.1	GroES-like zinc-binding alcohol dehydrogenase family protein	0.332	0.363	0.034124	0.0220369		Down for (0dpi-AtGAP1 overexpressor line A) / (0dpi-empty vector )
AT1G26570.1	UDP-glucose dehydrogenase 1	0.01	0.729	7.85008e-17	0.711851		Down for (0dpi-AtGAP1 overexpressor line A) / (0dpi-empty vector )
AT5G09440.1	EXORDIUM like 4	0.153	1	0.00240566	0.985897		Down for (0dpi-AtGAP1 overexpressor line A) / (0dpi-empty vector )
AT3G55010.1	phosphoribosylformylglycinamidine cyclo-ligase, chloroplast / phosphoribosyl-aminoimidazole synthetase / AIR synthase (PUR5)	0.11	1.101	6.362e-05	0.999328		Down for (0dpi-AtGAP1 overexpressor line A) / (0dpi-empty vector )
AT5G03650.1	starch branching enzyme 2.2	0.01	0.747	7.85008e-17	0.785111		Down for (0dpi-AtGAP1 overexpressor line A) / (0dpi-empty vector )
AT5G42190.1	E3 ubiquitin ligase SCF complex subunit SKP1/ASK1 family protein	0.01	0.833	7.85008e-17	0.880552		Down for (0dpi-AtGAP1 overexpressor line A) / (0dpi-empty vector )
AT1G44820.1	Peptidase M20/M25/M40 family protein	0.072	0.411	2.72333e-07	0.178135		Down for (0dpi-AtGAP1 overexpressor line A) / (0dpi-empty vector )
AT4G32640.2	Sec23/Sec24 protein transport family protein	0.01	0.316	7.85008e-17	0.0556148		Down for (0dpi-AtGAP1 overexpressor line A) / (0dpi-empty vector )
AT2G22780.1	peroxisomal NAD-malate dehydrogenase 1	0.01	2.696	7.85008e-17	0.278253		Down for (0dpi-AtGAP1 overexpressor line A) / (0dpi-empty vector )
AT4G23680.1	Polyketide cyclase/dehydrase and lipid transport superfamily protein	0.01	8.072	7.85008e-17	8.98488e-05		Down for (0dpi-AtGAP1 overexpressor line A) / (0dpi-empty vector )
AT4G19710.2	aspartate kinase-homoserine dehydrogenase ii	0.01	0.572	7.85008e-17	0.517417		Down for (0dpi-AtGAP1 overexpressor line A) / (0dpi-empty vector )
AT2G21160.1	Translocon-associated protein (TRAP), alpha subunit	0.237	0.439	0.00402372	0.21866		Down for (0dpi-AtGAP1 overexpressor line A) / (0dpi-empty vector )
AT4G22010.1	SKU5 similar 4	0.01	0.636	7.85008e-17	0.629022		Down for (0dpi-AtGAP1 overexpressor line A) / (0dpi-empty vector )
AT3G04590.2	AT hook motif DNA-binding family protein	0.01	1.145	7.85008e-17	0.991393		Down for (0dpi-AtGAP1 overexpressor line A) / (0dpi-empty vector )
AT1G32440.1	plastidial pyruvate kinase 3	0.01	0.626	7.85008e-17	0.613591		Down for (0dpi-AtGAP1 overexpressor line A) / (0dpi-empty vector )
AT2G35840.1	Sucrose-6F-phosphate phosphohydrolase family protein	0.01	1.177	7.85008e-17	0.981794		Down for (0dpi-AtGAP1 overexpressor line A) / (0dpi-empty vector )
AT3G15950.1	DNA topoisomerase-related	0.01	1.451	7.85008e-17	0.813272		Down for (0dpi-AtGAP1 overexpressor line A) / (0dpi-empty vector )
AT2G38750.1	annexin 4	0.114	1.898	0.000329629	0.527923		Down for (0dpi-AtGAP1 overexpressor line A) / (0dpi-empty vector )
AT5G44316.1	Stabilizer of iron transporter SufD superfamily protein	0.225	1.173	1.99392e-05	0.96465		Down for (0dpi-AtGAP1 overexpressor line A) / (0dpi-empty vector )
AT1G74880.1	NAD(P)H:plastoquinone dehydrogenase complex subunit O	0.01	1.828	7.85008e-17	0.584548		Down for (0dpi-AtGAP1 overexpressor line A) / (0dpi-empty vector )
AT3G50370.1	unknown protein; FUNCTIONS IN: molecular_function unknown; INVOLVED IN: biological_process unknown; LOCATED IN: cellular_component unknown; EXPRESSED IN: 26 plant structures; EXPRESSED DURING: 15 growth stages; Has 27734 Blast hits to 16708 proteins in 1259 species: Archae - 81; Bacteria - 3434; Metazoa - 10876; Fungi - 2514; Plants - 987; Viruses - 212; Other Eukaryotes - 9630 (source: NCBI BLin…	0.01	1.531	7.85008e-17	0.750951		Down for (0dpi-AtGAP1 overexpressor line A) / (0dpi-empty vector )
AT2G47850.3	Zinc finger C-x8-C-x5-C-x3-H type family protein	0.01	1.073	7.85008e-17	0.997489		Down for (0dpi-AtGAP1 overexpressor line A) / (0dpi-empty vector )
AT2G21370.1	xylulose kinase-1	0.01	1.404	7.85008e-17	0.863075		Down for (0dpi-AtGAP1 overexpressor line A) / (0dpi-empty vector )
AT4G30480.2	Tetratricopeptide repeat (TPR)-like superfamily protein	0.09	1.312	4.36025e-06	0.88251		Down for (0dpi-AtGAP1 overexpressor line A) / (0dpi-empty vector )
AT2G44525.1	Protein of unknown function (DUF498/DUF598)	0.01	1.156	7.85008e-17	0.967549		Down for (0dpi-AtGAP1 overexpressor line A) / (0dpi-empty vector )
AT4G03430.1	pre-mRNA splicing factor-related	0.01	0.977	7.85008e-17	0.984996		Down for (0dpi-AtGAP1 overexpressor line A) / (0dpi-empty vector )
AT3G48140.1	B12D protein	0.01	0.781	7.85008e-17	0.835744		Down for (0dpi-AtGAP1 overexpressor line A) / (0dpi-empty vector )
AT4G10840.1	Tetratricopeptide repeat (TPR)-like superfamily protein	0.01	0.534	7.85008e-17	0.412921		Down for (0dpi-AtGAP1 overexpressor line A) / (0dpi-empty vector )
AT5G48790.1	Domain of unknown function (DUF1995)	0.081	0.339	3.25433e-06	0.0575848		Down for (0dpi-AtGAP1 overexpressor line A) / (0dpi-empty vector )
AT1G76140.1	Prolyl oligopeptidase family protein	0.164	1.134	0.000257293	0.996072		Down for (0dpi-AtGAP1 overexpressor line A) / (0dpi-empty vector )
AT4G34270.1	TIP41-like family protein	0.01	1.025	7.85008e-17	0.987982		Down for (0dpi-AtGAP1 overexpressor line A) / (0dpi-empty vector )
AT5G13260.1	unknown protein; BEST Arabidopsis thaliana protein match is: unknown protein (TAIR:AT3G48860.2); Has 30201 Blast hits to 17322 proteins in 780 species: Archae - 12; Bacteria - 1396; Metazoa - 17338; Fungi - 3422; Plants - 5037; Viruses - 0; Other Eukaryotes - 2996 (source: NCBI BLink).	0.01	0.833	7.85008e-17	0.867023		Down for (0dpi-AtGAP1 overexpressor line A) / (0dpi-empty vector )
AT5G08610.1	P-loop containing nucleoside triphosphate hydrolases superfamily protein	0.01	0.725	7.85008e-17	0.778661		Down for (0dpi-AtGAP1 overexpressor line A) / (0dpi-empty vector )
AT4G21160.2	Calcium-dependent ARF-type GTPase activating protein family	0.01	1.26	7.85008e-17	0.952741		Down for (0dpi-AtGAP1 overexpressor line A) / (0dpi-empty vector )
AT1G26230.1	TCP-1/cpn60 chaperonin family protein	0.01	1.003	7.85008e-17	0.991393		Down for (0dpi-AtGAP1 overexpressor line A) / (0dpi-empty vector )
AT1G69030.1	BSD domain-containing protein	0.01	0.936	7.85008e-17	0.96465		Down for (0dpi-AtGAP1 overexpressor line A) / (0dpi-empty vector )
AT1G03090.2	methylcrotonyl-CoA carboxylase alpha chain, mitochondrial / 3-methylcrotonyl-CoA carboxylase 1 (MCCA)	0.17	2.188	0.000318064	0.35994		Down for (0dpi-AtGAP1 overexpressor line A) / (0dpi-empty vector )
AT5G13520.1	peptidase M1 family protein	0.01	0.62	7.85008e-17	0.629219		Down for (0dpi-AtGAP1 overexpressor line A) / (0dpi-empty vector )
AT2G16710.3	Iron-sulphur cluster biosynthesis family protein	0.01	2.09	7.85008e-17	0.419521		Down for (0dpi-AtGAP1 overexpressor line A) / (0dpi-empty vector )
AT3G12670.1	CTP synthase family protein	0.01	0.638	7.85008e-17	0.662506		Down for (0dpi-AtGAP1 overexpressor line A) / (0dpi-empty vector )
AT5G17510.1	unknown protein; BEST Arabidopsis thaliana protein match is: unknown protein (TAIR:AT3G03460.1); Has 1807 Blast hits to 1807 proteins in 277 species: Archae - 0; Bacteria - 0; Metazoa - 736; Fungi - 347; Plants - 385; Viruses - 0; Other Eukaryotes - 339 (source: NCBI BLink).	0.01	0.588	7.85008e-17	0.517558		Down for (0dpi-AtGAP1 overexpressor line A) / (0dpi-empty vector )
AT1G61620.1	phosphoinositide binding	0.01	0.584	7.85008e-17	0.559445		Down for (0dpi-AtGAP1 overexpressor line A) / (0dpi-empty vector )
AT2G45140.1	plant VAP homolog 12	0.01	0.82	7.85008e-17	0.835744		Down for (0dpi-AtGAP1 overexpressor line A) / (0dpi-empty vector )
AT1G48160.1	signal recognition particle 19 kDa protein, putative / SRP19, putative	0.01	1.023	7.85008e-17	0.987982		Down for (0dpi-AtGAP1 overexpressor line A) / (0dpi-empty vector )
AT5G56290.1	peroxin 5	0.213	0.644	0.00232825	0.596001		Down for (0dpi-AtGAP1 overexpressor line A) / (0dpi-empty vector )
AT5G10950.1	Tudor/PWWP/MBT superfamily protein	0.126	0.945	0.000762479	0.967326		Down for (0dpi-AtGAP1 overexpressor line A) / (0dpi-empty vector )
AT3G47340.1	glutamine-dependent asparagine synthase 1	0.156	1.091	1.72504e-05	0.991393		Down for (0dpi-AtGAP1 overexpressor line A) / (0dpi-empty vector )
AT5G38890.1	Nucleic acid-binding, OB-fold-like protein	0.01	0.946	7.85008e-17	0.96465		Down for (0dpi-AtGAP1 overexpressor line A) / (0dpi-empty vector )
AT3G17040.1	high chlorophyll fluorescent 107	0.01	1.392	7.85008e-17	0.851747		Down for (0dpi-AtGAP1 overexpressor line A) / (0dpi-empty vector )
AT2G47250.1	RNA helicase family protein	0.01	0.85	7.85008e-17	0.901106		Down for (0dpi-AtGAP1 overexpressor line A) / (0dpi-empty vector )
AT1G49670.2	ARP protein (REF)	0.01	1.067	7.85008e-17	0.993185		Down for (0dpi-AtGAP1 overexpressor line A) / (0dpi-empty vector )
AT3G47450.1	P-loop containing nucleoside triphosphate hydrolases superfamily protein	0.01	0.917	7.85008e-17	0.952741		Down for (0dpi-AtGAP1 overexpressor line A) / (0dpi-empty vector )
AT2G16485.1	nucleic acid binding;zinc ion binding;DNA binding	0.01	0.844	7.85008e-17	0.88711		Down for (0dpi-AtGAP1 overexpressor line A) / (0dpi-empty vector )
AT5G48335.1	unknown protein; FUNCTIONS IN: molecular_function unknown; INVOLVED IN: biological_process unknown; LOCATED IN: chloroplast; BEST Arabidopsis thaliana protein match is: unknown protein (TAIR:AT3G07580.1); Has 35333 Blast hits to 34131 proteins in 2444 species: Archae - 798; Bacteria - 22429; Metazoa - 974; Fungi - 991; Plants - 531; Viruses - 0; Other Eukaryotes - 9610 (source: NCBI BLink).	0.161	2.731	0.00176712	0.155311		Down for (0dpi-AtGAP1 overexpressor line A) / (0dpi-empty vector )
AT2G28390.1	SAND family protein	0.01	0.803	7.85008e-17	0.862291		Down for (0dpi-AtGAP1 overexpressor line A) / (0dpi-empty vector )
AT1G59990.1	DEA(D/H)-box RNA helicase family protein	0.01	1.076	7.85008e-17	0.997489		Down for (0dpi-AtGAP1 overexpressor line A) / (0dpi-empty vector )
AT1G66130.1	NAD(P)-binding Rossmann-fold superfamily protein	0.01	0.579	7.85008e-17	0.521123		Down for (0dpi-AtGAP1 overexpressor line A) / (0dpi-empty vector )
AT5G62440.1	Protein of unknown function (DUF3223)	0.264	0.929	0.00987291	0.914374		Down for (0dpi-AtGAP1 overexpressor line A) / (0dpi-empty vector )
AT2G44065.2	Ribosomal protein L2 family	0.01	1.413	7.85008e-17	0.888934		Down for (0dpi-AtGAP1 overexpressor line A) / (0dpi-empty vector )
AT3G06810.1	acyl-CoA dehydrogenase-related	0.01	0.483	7.85008e-17	0.335714		Down for (0dpi-AtGAP1 overexpressor line A) / (0dpi-empty vector )
AT2G38580.1	Mitochondrial ATP synthase D chain-related protein	0.01	0.76	7.85008e-17	0.807791		Down for (0dpi-AtGAP1 overexpressor line A) / (0dpi-empty vector )
AT2G45600.1	alpha/beta-Hydrolases superfamily protein	0.01	1.14	7.85008e-17	0.978296		Down for (0dpi-AtGAP1 overexpressor line A) / (0dpi-empty vector )
AT1G21660.1	Chaperone DnaJ-domain superfamily protein	0.01	0.947	7.85008e-17	0.930214		Down for (0dpi-AtGAP1 overexpressor line A) / (0dpi-empty vector )
AT1G17140.2	interactor of constitutive active rops 1	0.093	0.733	1.3689e-06	0.743591		Down for (0dpi-AtGAP1 overexpressor line A) / (0dpi-empty vector )
AT3G15520.1	Cyclophilin-like peptidyl-prolyl cis-trans isomerase family protein	4.104	1.794	3.86843e-07	0.142655		Up for (0dpi-AtGAP1 overexpressor line A) / (0dpi-empty vector )
AT4G23650.1	calcium-dependent protein kinase 6	11.878	1.254	6.96151e-15	0.880552		Up for (0dpi-AtGAP1 overexpressor line A) / (0dpi-empty vector )
AT5G61030.1	glycine-rich RNA-binding protein 3	4.502	2.94	0.0011015	0.0226075		Up for (0dpi-AtGAP1 overexpressor line A) / (0dpi-empty vector )
AT2G39050.1	hydroxyproline-rich glycoprotein family protein	3.635	2.966	0.0380332	0.0528181		Up for (0dpi-AtGAP1 overexpressor line A) / (0dpi-empty vector )
AT3G44300.1	nitrilase 2	9.401	0.01	6.85134e-05	8.31301e-17		Up for (0dpi-AtGAP1 overexpressor line A) / (0dpi-empty vector )
AT3G02230.1	reversibly glycosylated polypeptide 1	100	0.01	7.85008e-17	8.31301e-17		Up for (0dpi-AtGAP1 overexpressor line A) / (0dpi-empty vector )
AT1G11580.1	methylesterase PCR A	6.552	1.957	3.92829e-05	0.626292		Up for (0dpi-AtGAP1 overexpressor line A) / (0dpi-empty vector )
AT2G28760.1	UDP-XYL synthase 6	10.414	1	7.62145e-05	0.991393		Up for (0dpi-AtGAP1 overexpressor line A) / (0dpi-empty vector )
AT1G75270.1	dehydroascorbate reductase 2	100	1	7.85008e-17	0.96465		Up for (0dpi-AtGAP1 overexpressor line A) / (0dpi-empty vector )
AT3G51880.1	high mobility group B1	6.37	0.01	0.00503776	8.31301e-17		Up for (0dpi-AtGAP1 overexpressor line A) / (0dpi-empty vector )
AT2G44350.2	Citrate synthase family protein	3.996	1.798	0.015664	0.519597		Up for (0dpi-AtGAP1 overexpressor line A) / (0dpi-empty vector )
AT1G52740.1	histone H2A protein 9	3.769	2.639	0.0417091	0.266088		Up for (0dpi-AtGAP1 overexpressor line A) / (0dpi-empty vector )
AT1G14510.1	alfin-like 7	4.471	3.697	0.027029	0.0644319		Up for (0dpi-AtGAP1 overexpressor line A) / (0dpi-empty vector )
AT1G05805.1	basic helix-loop-helix (bHLH) DNA-binding superfamily protein	5.542	0.488	0.000942714	0.249646		Up for (0dpi-AtGAP1 overexpressor line A) / (0dpi-empty vector )
AT2G45220.1	Plant invertase/pectin methylesterase inhibitor superfamily	100	100	7.85008e-17	8.31301e-17		Up for (0dpi-AtGAP1 overexpressor line A) / (0dpi-empty vector )
AT2G05520.5	glycine-rich protein 3	100	0.01	7.85008e-17	8.31301e-17		Up for (0dpi-AtGAP1 overexpressor line A) / (0dpi-empty vector )
AT1G47500.1	RNA-binding protein 47C'	3.494	1.883	0.000839948	0.416987		Up for (0dpi-AtGAP1 overexpressor line A) / (0dpi-empty vector )
AT1G23440.1	Peptidase C15, pyroglutamyl peptidase I-like	6.603	1.084	0.00141423	0.999519		Up for (0dpi-AtGAP1 overexpressor line A) / (0dpi-empty vector )
AT1G24160.1	unknown protein; BEST Arabidopsis thaliana protein match is: unknown protein (TAIR:AT1G70100.3); Has 5230 Blast hits to 4162 proteins in 477 species: Archae - 30; Bacteria - 540; Metazoa - 2022; Fungi - 429; Plants - 280; Viruses - 32; Other Eukaryotes - 1897 (source: NCBI BLink).	100	100	7.85008e-17	8.31301e-17		Up for (0dpi-AtGAP1 overexpressor line A) / (0dpi-empty vector )
AT5G48180.1	nitrile specifier protein 5	100	100	7.85008e-17	8.31301e-17		Up for (0dpi-AtGAP1 overexpressor line A) / (0dpi-empty vector )
AT2G29290.2	NAD(P)-binding Rossmann-fold superfamily protein	18.029	1	1.27197e-06	0.985897		Up for (0dpi-AtGAP1 overexpressor line A) / (0dpi-empty vector )
AT5G22120.1	unknown protein; FUNCTIONS IN: molecular_function unknown; INVOLVED IN: biological_process unknown; LOCATED IN: cellular_component unknown; EXPRESSED IN: cultured cell; Has 30201 Blast hits to 17322 proteins in 780 species: Archae - 12; Bacteria - 1396; Metazoa - 17338; Fungi - 3422; Plants - 5037; Viruses - 0; Other Eukaryotes - 2996 (source: NCBI BLink).	100		7.85008e-17			Up for (0dpi-AtGAP1 overexpressor line A) / (0dpi-empty vector )
AT4G01480.1	pyrophosphorylase 5	100		7.85008e-17			Up for (0dpi-AtGAP1 overexpressor line A) / (0dpi-empty vector )
AT3G60450.1	Phosphoglycerate mutase family protein	100	100	7.85008e-17	8.31301e-17		Up for (0dpi-AtGAP1 overexpressor line A) / (0dpi-empty vector )
AT1G31817.1	Ribosomal L18p/L5e family protein	100	100	7.85008e-17	8.31301e-17		Up for (0dpi-AtGAP1 overexpressor line A) / (0dpi-empty vector )
AT1G21080.3	DNAJ heat shock N-terminal domain-containing protein	8.252	0.735	0.000404102	0.775777		Up for (0dpi-AtGAP1 overexpressor line A) / (0dpi-empty vector )
AT4G30810.1	serine carboxypeptidase-like 29	4.218	1.228	0.0425851	0.928651		Up for (0dpi-AtGAP1 overexpressor line A) / (0dpi-empty vector )
AT1G17490.1	unknown protein; BEST Arabidopsis thaliana protein match is: unknown protein (TAIR:AT1G72690.1); Has 57 Blast hits to 45 proteins in 9 species: Archae - 0; Bacteria - 0; Metazoa - 0; Fungi - 0; Plants - 57; Viruses - 0; Other Eukaryotes - 0 (source: NCBI BLink).	5.783	2.091	7.79794e-05	0.431851		Up for (0dpi-AtGAP1 overexpressor line A) / (0dpi-empty vector )
AT4G15560.1	Deoxyxylulose-5-phosphate synthase	3.354	1.341	0.0453006	0.866557		Up for (0dpi-AtGAP1 overexpressor line A) / (0dpi-empty vector )
AT3G09970.1	Calcineurin-like metallo-phosphoesterase superfamily protein	8.82	0.975	0.000213012	0.96465		Up for (0dpi-AtGAP1 overexpressor line A) / (0dpi-empty vector )
AT4G05090.1	Inositol monophosphatase family protein	100	1	7.85008e-17	0.989941		Up for (0dpi-AtGAP1 overexpressor line A) / (0dpi-empty vector )
AT1G20580.1	Small nuclear ribonucleoprotein family protein	100	100	7.85008e-17	8.31301e-17		Up for (0dpi-AtGAP1 overexpressor line A) / (0dpi-empty vector )
AT2G43510.1	trypsin inhibitor protein 1	100		7.85008e-17			Up for (0dpi-AtGAP1 overexpressor line A) / (0dpi-empty vector )
AT4G30930.1	Ribosomal protein L21	10.991	1	2.1932e-05	0.991393		Up for (0dpi-AtGAP1 overexpressor line A) / (0dpi-empty vector )
AT1G72330.3	alanine aminotransferase 2	100	1	7.85008e-17	0.991393		Up for (0dpi-AtGAP1 overexpressor line A) / (0dpi-empty vector )
AT5G16780.1	SART-1 family	100		7.85008e-17			Up for (0dpi-AtGAP1 overexpressor line A) / (0dpi-empty vector )
AT1G07960.1	PDI-like 5-1	100	100	7.85008e-17	8.31301e-17		Up for (0dpi-AtGAP1 overexpressor line A) / (0dpi-empty vector )
AT2G38730.1	Cyclophilin-like peptidyl-prolyl cis-trans isomerase family protein	100		7.85008e-17			Up for (0dpi-AtGAP1 overexpressor line A) / (0dpi-empty vector )
AT5G41220.1	glutathione S-transferase THETA 3	100	0.01	7.85008e-17	8.31301e-17		Up for (0dpi-AtGAP1 overexpressor line A) / (0dpi-empty vector )
AT1G43560.1	thioredoxin Y2	3.458	2.646	0.020236	0.171292		Up for (0dpi-AtGAP1 overexpressor line A) / (0dpi-empty vector )
AT3G09250.2	Nuclear transport factor 2 (NTF2) family protein	4.385	1.542	0.0308743	0.815361		Up for (0dpi-AtGAP1 overexpressor line A) / (0dpi-empty vector )
AT1G02280.2	translocon at the outer envelope membrane of chloroplasts 33	6.868	0.01	0.00336489	8.31301e-17		Up for (0dpi-AtGAP1 overexpressor line A) / (0dpi-empty vector )
AT3G28270.2	Protein of unknown function (DUF677)	5.303	2.532	0.0156916	0.256456		Up for (0dpi-AtGAP1 overexpressor line A) / (0dpi-empty vector )
AT1G07930.2	GTP binding Elongation factor Tu family protein	0.733	0.01	0.626279	8.31301e-17		Down for (0dpi-AtGAP1 overexpressor line C) / (0dpi-empty vector )
AT4G17470.2	alpha/beta-Hydrolases superfamily protein	0.661	0.088	0.618756	3.59787e-07		Down for (0dpi-AtGAP1 overexpressor line C) / (0dpi-empty vector )
AT1G52040.1	myrosinase-binding protein 1	0.827	0.01	0.850001	8.31301e-17		Down for (0dpi-AtGAP1 overexpressor line C) / (0dpi-empty vector )
AT1G04710.1	peroxisomal 3-ketoacyl-CoA thiolase 4	1.296	0.01	0.932654	8.31301e-17		Down for (0dpi-AtGAP1 overexpressor line C) / (0dpi-empty vector )
AT2G32730.1	26S proteasome regulatory complex, non-ATPase subcomplex, Rpn2/Psmd1 subunit	0.377	0.301	0.0029182	5.98896e-05		Down for (0dpi-AtGAP1 overexpressor line C) / (0dpi-empty vector )
AT4G30190.2	H(+)-ATPase 2	0.978	0.01	0.961418	8.31301e-17		Down for (0dpi-AtGAP1 overexpressor line C) / (0dpi-empty vector )
AT3G28930.1	AIG2-like (avirulence induced gene) family protein	1.462	0.309	0.900972	0.0332479		Down for (0dpi-AtGAP1 overexpressor line C) / (0dpi-empty vector )
AT3G18060.1	transducin family protein / WD-40 repeat family protein	0.52	0.217	0.357764	0.00302731		Down for (0dpi-AtGAP1 overexpressor line C) / (0dpi-empty vector )
AT1G20200.1	PAM domain (PCI/PINT associated module) protein	0.505	0.31	0.260732	0.00505551		Down for (0dpi-AtGAP1 overexpressor line C) / (0dpi-empty vector )
AT5G25540.1	CTC-interacting domain 6	2.691	0.01	0.24217	8.31301e-17		Down for (0dpi-AtGAP1 overexpressor line C) / (0dpi-empty vector )
AT3G15610.1	Transducin/WD40 repeat-like superfamily protein	0.931	0.01	0.986067	8.31301e-17		Down for (0dpi-AtGAP1 overexpressor line C) / (0dpi-empty vector )
AT5G05780.1	RP non-ATPase subunit 8A	0.525	0.116	0.369464	1.01123e-05		Down for (0dpi-AtGAP1 overexpressor line C) / (0dpi-empty vector )
AT3G02760.1	Class II aaRS and biotin synthetases superfamily protein	2.169	0.145	0.496868	0.000339229		Down for (0dpi-AtGAP1 overexpressor line C) / (0dpi-empty vector )
AT2G21060.1	glycine-rich protein 2B	0.614	0.01	0.493226	8.31301e-17		Down for (0dpi-AtGAP1 overexpressor line C) / (0dpi-empty vector )
AT3G51880.1	high mobility group B1	6.37	0.01	0.00503776	8.31301e-17		Down for (0dpi-AtGAP1 overexpressor line C) / (0dpi-empty vector )
AT2G27510.1	ferredoxin 3	0.378	0.01	0.0952585	8.31301e-17		Down for (0dpi-AtGAP1 overexpressor line C) / (0dpi-empty vector )
AT3G19480.1	D-3-phosphoglycerate dehydrogenase	2.27	0.01	0.447379	8.31301e-17		Down for (0dpi-AtGAP1 overexpressor line C) / (0dpi-empty vector )
AT1G08680.4	ARF GAP-like zinc finger-containing protein ZIGA4	1.183	0.124	0.975688	9.71905e-06		Down for (0dpi-AtGAP1 overexpressor line C) / (0dpi-empty vector )
AT5G08450.3	FUNCTIONS IN: molecular_function unknown; INVOLVED IN: biological_process unknown; LOCATED IN: cellular_component unknown; EXPRESSED IN: 25 plant structures; EXPRESSED DURING: 15 growth stages; CONTAINS InterPro DOMAIN/s: Histone deacetylation protein Rxt3 (InterPro:IPR013951); Has 34444 Blast hits to 20801 proteins in 1175 species: Archae - 64; Bacteria - 2390; Metazoa - 15568; Fungi - 3729; Pla…	0.523	0.132	0.446412	3.27511e-05		Down for (0dpi-AtGAP1 overexpressor line C) / (0dpi-empty vector )
AT2G46520.1	cellular apoptosis susceptibility protein, putative / importin-alpha re-exporter, putative	0.454	0.01	0.229919	8.31301e-17		Down for (0dpi-AtGAP1 overexpressor line C) / (0dpi-empty vector )
AT2G05520.5	glycine-rich protein 3	100	0.01	7.85008e-17	8.31301e-17		Down for (0dpi-AtGAP1 overexpressor line C) / (0dpi-empty vector )
AT5G11330.1	FAD/NAD(P)-binding oxidoreductase family protein	0.683	0.01	0.819002	8.31301e-17		Down for (0dpi-AtGAP1 overexpressor line C) / (0dpi-empty vector )
AT1G04810.1	26S proteasome regulatory complex, non-ATPase subcomplex, Rpn2/Psmd1 subunit	0.583	0.299	0.444302	0.0177477		Down for (0dpi-AtGAP1 overexpressor line C) / (0dpi-empty vector )
AT3G04650.1	FAD/NAD(P)-binding oxidoreductase family protein	0.768	0.01	0.881471	8.31301e-17		Down for (0dpi-AtGAP1 overexpressor line C) / (0dpi-empty vector )
AT1G66530.1	Arginyl-tRNA synthetase, class Ic	0.77	0.01	0.859105	8.31301e-17		Down for (0dpi-AtGAP1 overexpressor line C) / (0dpi-empty vector )
AT4G37550.1	Acetamidase/Formamidase family protein	0.733	0.067	0.845719	5.15077e-09		Down for (0dpi-AtGAP1 overexpressor line C) / (0dpi-empty vector )
ATMG00070.1	NADH dehydrogenase subunit 9	0.44	0.01	0.370017	8.31301e-17		Down for (0dpi-AtGAP1 overexpressor line C) / (0dpi-empty vector )
AT5G18400.3	Cytokine-induced anti-apoptosis inhibitor 1, Fe-S biogenesis	0.77	0.094	0.892443	3.93337e-07		Down for (0dpi-AtGAP1 overexpressor line C) / (0dpi-empty vector )
AT4G33650.2	dynamin-related protein 3A	0.593	0.01	0.67356	8.31301e-17		Down for (0dpi-AtGAP1 overexpressor line C) / (0dpi-empty vector )
AT4G34030.1	3-methylcrotonyl-CoA carboxylase	0.61	0.072	0.713344	1.35318e-07		Down for (0dpi-AtGAP1 overexpressor line C) / (0dpi-empty vector )
AT1G72230.1	Cupredoxin superfamily protein	0.432	0.01	0.192459	8.31301e-17		Down for (0dpi-AtGAP1 overexpressor line C) / (0dpi-empty vector )
AT3G55770.7	GATA type zinc finger transcription factor family protein	0.469	0.103	0.391381	9.91084e-06		Down for (0dpi-AtGAP1 overexpressor line C) / (0dpi-empty vector )
AT3G43300.1	HOPM interactor 7	0.327	0.01	0.0874627	8.31301e-17		Down for (0dpi-AtGAP1 overexpressor line C) / (0dpi-empty vector )
AT2G02570.4	nucleic acid binding;RNA binding	2.616	0.132	0.340185	3.81126e-05		Down for (0dpi-AtGAP1 overexpressor line C) / (0dpi-empty vector )
AT3G18860.1	transducin family protein / WD-40 repeat family protein	0.864	0.01	0.932469	8.31301e-17		Down for (0dpi-AtGAP1 overexpressor line C) / (0dpi-empty vector )
AT2G18660.1	plant natriuretic peptide A	2.85	0.01	0.246763	8.31301e-17		Down for (0dpi-AtGAP1 overexpressor line C) / (0dpi-empty vector )
AT5G04885.1	Glycosyl hydrolase family protein	2.295	0.01	0.295932	8.31301e-17		Down for (0dpi-AtGAP1 overexpressor line C) / (0dpi-empty vector )
AT5G39590.1	TLD-domain containing nucleolar protein	0.352	0.01	0.190239	8.31301e-17		Down for (0dpi-AtGAP1 overexpressor line C) / (0dpi-empty vector )
AT4G12780.1	Chaperone DnaJ-domain superfamily protein	1.181	0.01	0.991224	8.31301e-17		Down for (0dpi-AtGAP1 overexpressor line C) / (0dpi-empty vector )
AT2G25110.1	stromal cell-derived factor 2-like protein precursor	2.64	0.01	0.260732	8.31301e-17		Down for (0dpi-AtGAP1 overexpressor line C) / (0dpi-empty vector )
AT4G05160.1	AMP-dependent synthetase and ligase family protein	0.833	0.01	0.847823	8.31301e-17		Down for (0dpi-AtGAP1 overexpressor line C) / (0dpi-empty vector )
AT5G24400.1	NagB/RpiA/CoA transferase-like superfamily protein	1.405	0.01	0.885133	8.31301e-17		Down for (0dpi-AtGAP1 overexpressor line C) / (0dpi-empty vector )
AT3G12500.1	basic chitinase	1.105	0.01	0.991224	8.31301e-17		Down for (0dpi-AtGAP1 overexpressor line C) / (0dpi-empty vector )
AT5G61580.1	phosphofructokinase 4	0.424	0.01	0.357764	8.31301e-17		Down for (0dpi-AtGAP1 overexpressor line C) / (0dpi-empty vector )
AT1G30530.1	UDP-glucosyl transferase 78D1	0.397	0.01	0.145729	8.31301e-17		Down for (0dpi-AtGAP1 overexpressor line C) / (0dpi-empty vector )
AT3G46740.1	translocon at the outer envelope membrane of chloroplasts 75-III	0.655	0.01	0.670106	8.31301e-17		Down for (0dpi-AtGAP1 overexpressor line C) / (0dpi-empty vector )
AT3G55970.1	jasmonate-regulated gene 21	0.933	0.01	0.984565	8.31301e-17		Down for (0dpi-AtGAP1 overexpressor line C) / (0dpi-empty vector )
AT4G02610.1	Aldolase-type TIM barrel family protein	3.709	0.01	0.091852	8.31301e-17		Down for (0dpi-AtGAP1 overexpressor line C) / (0dpi-empty vector )
AT5G57490.1	voltage dependent anion channel 4	0.507	0.07	0.484899	1.98483e-08		Down for (0dpi-AtGAP1 overexpressor line C) / (0dpi-empty vector )
AT3G42170.1	BED zinc finger ;hAT family dimerisation domain	0.854	0.091	0.869833	7.20982e-07		Down for (0dpi-AtGAP1 overexpressor line C) / (0dpi-empty vector )
AT4G30720.1	FAD/NAD(P)-binding oxidoreductase family protein	0.981	0.099	0.991224	1.13898e-06		Down for (0dpi-AtGAP1 overexpressor line C) / (0dpi-empty vector )
AT5G34850.1	purple acid phosphatase 26	0.576	0.075	0.535817	1.04108e-07		Down for (0dpi-AtGAP1 overexpressor line C) / (0dpi-empty vector )
AT1G05720.1	selenoprotein family protein	1.54	0.137	0.827291	3.30648e-05		Down for (0dpi-AtGAP1 overexpressor line C) / (0dpi-empty vector )
AT4G13730.1	Ypt/Rab-GAP domain of gyp1p superfamily protein	3.76	0.01	0.0874627	8.31301e-17		Down for (0dpi-AtGAP1 overexpressor line C) / (0dpi-empty vector )
AT5G30490.2	FUNCTIONS IN: molecular_function unknown; INVOLVED IN: biological_process unknown; LOCATED IN: cellular_component unknown; EXPRESSED IN: 22 plant structures; EXPRESSED DURING: 13 growth stages; CONTAINS InterPro DOMAIN/s: Craniofacial development protein 1/Bucentaur (InterPro:IPR011421); Has 333 Blast hits to 324 proteins in 149 species: Archae - 0; Bacteria - 18; Metazoa - 117; Fungi - 96; Plant…	1.585	0.01	0.799744	8.31301e-17		Down for (0dpi-AtGAP1 overexpressor line C) / (0dpi-empty vector )
AT1G49660.1	carboxyesterase 5	0.719	0.01	0.794258	8.31301e-17		Down for (0dpi-AtGAP1 overexpressor line C) / (0dpi-empty vector )
AT1G60550.1	enoyl-CoA hydratase/isomerase D	0.815	0.01	0.910111	8.31301e-17		Down for (0dpi-AtGAP1 overexpressor line C) / (0dpi-empty vector )
AT1G64230.4	ubiquitin-conjugating enzyme 28	0.911	0.01	0.910111	8.31301e-17		Down for (0dpi-AtGAP1 overexpressor line C) / (0dpi-empty vector )
AT5G13010.1	RNA helicase family protein	0.352	0.21	0.063652	0.0023903		Down for (0dpi-AtGAP1 overexpressor line C) / (0dpi-empty vector )
AT3G55605.1	Mitochondrial glycoprotein family protein	0.748	0.01	0.873083	8.31301e-17		Down for (0dpi-AtGAP1 overexpressor line C) / (0dpi-empty vector )
AT4G36400.2	FAD-linked oxidases family protein	0.969	0.01	0.991224	8.31301e-17		Down for (0dpi-AtGAP1 overexpressor line C) / (0dpi-empty vector )
AT3G57520.1	seed imbibition 2	1.566	0.01	0.816195	8.31301e-17		Down for (0dpi-AtGAP1 overexpressor line C) / (0dpi-empty vector )
AT2G39900.1	GATA type zinc finger transcription factor family protein	0.994	0.01	0.992847	8.31301e-17		Down for (0dpi-AtGAP1 overexpressor line C) / (0dpi-empty vector )
AT5G57460.1	unknown protein; FUNCTIONS IN: molecular_function unknown; INVOLVED IN: biological_process unknown; LOCATED IN: plasma membrane, chloroplast; EXPRESSED IN: 23 plant structures; EXPRESSED DURING: 13 growth stages; Has 166 Blast hits to 166 proteins in 41 species: Archae - 0; Bacteria - 0; Metazoa - 112; Fungi - 4; Plants - 36; Viruses - 0; Other Eukaryotes - 14 (source: NCBI BLink).	0.54	0.01	0.598464	8.31301e-17		Down for (0dpi-AtGAP1 overexpressor line C) / (0dpi-empty vector )
AT1G04190.1	Tetratricopeptide repeat (TPR)-like superfamily protein	0.603	0.01	0.67356	8.31301e-17		Down for (0dpi-AtGAP1 overexpressor line C) / (0dpi-empty vector )
AT5G25220.1	KNOTTED1-like homeobox gene 3	0.781	0.01	0.893871	8.31301e-17		Down for (0dpi-AtGAP1 overexpressor line C) / (0dpi-empty vector )
AT4G35970.1	ascorbate peroxidase 5	1.131	0.01	0.987169	8.31301e-17		Down for (0dpi-AtGAP1 overexpressor line C) / (0dpi-empty vector )
AT5G10460.1	Haloacid dehalogenase-like hydrolase (HAD) superfamily protein	3.627	0.155	0.102056	9.56512e-05		Down for (0dpi-AtGAP1 overexpressor line C) / (0dpi-empty vector )
AT2G03510.1	SPFH/Band 7/PHB domain-containing membrane-associated protein family	1.226	0.057	0.95601	2.62469e-10		Down for (0dpi-AtGAP1 overexpressor line C) / (0dpi-empty vector )
AT1G73260.1	kunitz trypsin inhibitor 1	1	100	0.983596	8.31301e-17		Up for (0dpi-AtGAP1 overexpressor line C) / (0dpi-empty vector )
AT1G68590.1	Ribosomal protein PSRP-3/Ycf65	2.63	3.313	0.028918	0.00025154		Up for (0dpi-AtGAP1 overexpressor line C) / (0dpi-empty vector )
AT1G48470.1	glutamine synthetase 1;5	1	11.836	0.992451	2.84105e-07		Up for (0dpi-AtGAP1 overexpressor line C) / (0dpi-empty vector )
AT2G37550.2	ARF-GAP domain 7	3.084	3.859	0.0882907	0.00662072		Up for (0dpi-AtGAP1 overexpressor line C) / (0dpi-empty vector )
ATCG00065.1	ribosomal protein S12A	2.583	3.147	0.099342	0.00406193		Up for (0dpi-AtGAP1 overexpressor line C) / (0dpi-empty vector )
AT3G06350.1	dehydroquinate dehydratase, putative / shikimate dehydrogenase, putative	2.054	3.401	0.310429	0.00275193		Up for (0dpi-AtGAP1 overexpressor line C) / (0dpi-empty vector )
AT1G09010.1	glycoside hydrolase family 2 protein	1	100	0.992568	8.31301e-17		Up for (0dpi-AtGAP1 overexpressor line C) / (0dpi-empty vector )
AT2G33740.2	Nitrogen regulatory PII-like, alpha/beta	2.088	4.296	0.436399	0.00177405		Up for (0dpi-AtGAP1 overexpressor line C) / (0dpi-empty vector )
AT4G33670.1	NAD(P)-linked oxidoreductase superfamily protein	3.41	5.025	0.135818	0.00263994		Up for (0dpi-AtGAP1 overexpressor line C) / (0dpi-empty vector )
AT2G22250.3	aspartate aminotransferase	2.94	3.574	0.0561395	0.00427378		Up for (0dpi-AtGAP1 overexpressor line C) / (0dpi-empty vector )
AT4G23680.1	Polyketide cyclase/dehydrase and lipid transport superfamily protein	0.01	8.072	7.85008e-17	8.98488e-05		Up for (0dpi-AtGAP1 overexpressor line C) / (0dpi-empty vector )
AT1G19670.1	chlorophyllase 1		100		8.31301e-17		Up for (0dpi-AtGAP1 overexpressor line C) / (0dpi-empty vector )
AT1G44790.1	ChaC-like family protein	1.207	33.507	0.985289	7.77521e-13		Up for (0dpi-AtGAP1 overexpressor line C) / (0dpi-empty vector )
AT1G60780.1	Clathrin adaptor complexes medium subunit family protein	0.989	100	0.991224	8.31301e-17		Up for (0dpi-AtGAP1 overexpressor line C) / (0dpi-empty vector )
AT4G01690.1	Flavin containing amine oxidoreductase family	2.801	3.798	0.233033	0.0255955		Up for (0dpi-AtGAP1 overexpressor line C) / (0dpi-empty vector )
AT5G08080.3	syntaxin of plants 132	0.01	15.26	7.85008e-17	8.03519e-09		Up for (0dpi-AtGAP1 overexpressor line C) / (0dpi-empty vector )
AT5G54940.2	Translation initiation factor SUI1 family protein	1	100	0.991224	8.31301e-17		Up for (0dpi-AtGAP1 overexpressor line C) / (0dpi-empty vector )
AT1G64760.1	O-Glycosyl hydrolases family 17 protein	1	3.429	0.992568	0.0390127		Up for (0dpi-AtGAP1 overexpressor line C) / (0dpi-empty vector )
AT1G51730.1	Ubiquitin-conjugating enzyme family protein	3.04	3.516	0.170685	0.0396762		Up for (0dpi-AtGAP1 overexpressor line C) / (0dpi-empty vector )
AT2G43760.1	molybdopterin biosynthesis MoaE family protein	100	100	7.85008e-17	8.31301e-17		Up for (0dpi-AtGAP1 overexpressor line C) / (0dpi-empty vector )
AT2G39795.1	Mitochondrial glycoprotein family protein	2.03	4.041	0.555754	0.031375		Up for (0dpi-AtGAP1 overexpressor line C) / (0dpi-empty vector )
AT4G25890.1	60S acidic ribosomal protein family		100		8.31301e-17		Up for (0dpi-AtGAP1 overexpressor line C) / (0dpi-empty vector )
AT5G21105.1	Plant L-ascorbate oxidase	3.081	3.754	0.195508	0.0222907		Up for (0dpi-AtGAP1 overexpressor line C) / (0dpi-empty vector )
AT5G06410.1	DNAJ heat shock N-terminal domain-containing protein	0.01	9.931	7.85008e-17	2.17399e-06		Up for (0dpi-AtGAP1 overexpressor line C) / (0dpi-empty vector )
AT3G63160.1	FUNCTIONS IN: molecular_function unknown; INVOLVED IN: biological_process unknown; LOCATED IN: chloroplast outer membrane, thylakoid, chloroplast thylakoid membrane, chloroplast, chloroplast envelope; EXPRESSED IN: 21 plant structures; EXPRESSED DURING: 13 growth stages; BEST Arabidopsis thaliana protein match is: outer envelope membrane protein 7 (TAIR:AT3G52420.1); Has 26 Blast hits to 26 prote…	2.122	3.264	0.340185	0.0302149		Up for (0dpi-AtGAP1 overexpressor line C) / (0dpi-empty vector )
AT1G70810.1	Calcium-dependent lipid-binding (CaLB domain) family protein	3.378	8.542	0.113698	7.65769e-05		Up for (0dpi-AtGAP1 overexpressor line C) / (0dpi-empty vector )
AT1G25350.2	glutamine-tRNA ligase, putative / glutaminyl-tRNA synthetase, putative / GlnRS, putative		100		8.31301e-17		Up for (0dpi-AtGAP1 overexpressor line C) / (0dpi-empty vector )
AT4G20860.1	FAD-binding Berberine family protein	2.969	3.028	0.111883	0.0261587		Up for (0dpi-AtGAP1 overexpressor line C) / (0dpi-empty vector )
AT3G19310.1	PLC-like phosphodiesterases superfamily protein	2.572	4.785	0.349577	0.00403345		Up for (0dpi-AtGAP1 overexpressor line C) / (0dpi-empty vector )
AT1G76890.2	Duplicated homeodomain-like superfamily protein	1	11.463	0.974188	3.23892e-08		Up for (0dpi-AtGAP1 overexpressor line C) / (0dpi-empty vector )
AT4G31360.1	selenium binding		100		8.31301e-17		Up for (0dpi-AtGAP1 overexpressor line C) / (0dpi-empty vector )
AT3G50520.1	Phosphoglycerate mutase family protein	100	100	7.85008e-17	8.31301e-17		Up for (0dpi-AtGAP1 overexpressor line C) / (0dpi-empty vector )
AT3G08780.1	unknown protein; FUNCTIONS IN: molecular_function unknown; INVOLVED IN: biological_process unknown; LOCATED IN: cellular_component unknown; EXPRESSED IN: male gametophyte, cultured cell; EXPRESSED DURING: L mature pollen stage, M germinated pollen stage; Has 129 Blast hits to 129 proteins in 38 species: Archae - 0; Bacteria - 0; Metazoa - 96; Fungi - 0; Plants - 31; Viruses - 0; Other Eukaryotes …	100	100	7.85008e-17	8.31301e-17		Up for (0dpi-AtGAP1 overexpressor line C) / (0dpi-empty vector )
AT5G40610.1	NAD-dependent glycerol-3-phosphate dehydrogenase family protein	100	100	7.85008e-17	8.31301e-17		Up for (0dpi-AtGAP1 overexpressor line C) / (0dpi-empty vector )
AT1G69210.1	Uncharacterised protein family UPF0090	2.973	4.293	0.191535	0.0222384		Up for (0dpi-AtGAP1 overexpressor line C) / (0dpi-empty vector )
AT5G47110.1	Chlorophyll A-B binding family protein	3.079	3.6	0.205297	0.0353939		Up for (0dpi-AtGAP1 overexpressor line C) / (0dpi-empty vector )
AT2G46600.1	Calcium-binding EF-hand family protein		100		8.31301e-17		Up for (0dpi-AtGAP1 overexpressor line C) / (0dpi-empty vector )
AT2G35940.1	BEL1-like homeodomain 1	0.01	9.948	7.85008e-17	2.22074e-05		Up for (0dpi-AtGAP1 overexpressor line C) / (0dpi-empty vector )
AT5G44200.1	CAP-binding protein 20		100		8.31301e-17		Up for (0dpi-AtGAP1 overexpressor line C) / (0dpi-empty vector )

## Sheet: Day3
Table S5. List of differentially expressed proteins in different genotypes of Arabidopsis at day 3 of Pst DC3000 inoculation.
Accession	Description	Abundance Ratio: (3dpi-AtGAP1 overexpressor line A) / (3dpi-empty vector )	Abundance Ratio: (3dpi-AtGAP1 overexpressor line C) / (3dpi-empty vector )	Abundance Ratio Adj. P-Value: (3dpi-AtGAP1 overexpressor line A) / (3dpi-empty vector )	Abundance Ratio Adj. P-Value: (3dpi-AtGAP1 overexpressor line C) / (3dpi-empty vector )	Direction of change	Direction of change (specific to either comparison)
AT5G23860.2	tubulin beta 8	0.01	0.01	1.15356e-16	1.04324e-16	Down
AT1G64740.1	alpha-1 tubulin	0.01	0.01	1.15356e-16	1.04324e-16	Down
AT5G54190.1	protochlorophyllide oxidoreductase A	0.278	0.01	0.00225103	1.04324e-16	Down
AT4G27070.1	tryptophan synthase beta-subunit 2	0.01	0.094	1.15356e-16	5.0578e-07	Down
AT2G45300.1	RNA 3'-terminal phosphate cyclase/enolpyruvate transferase, alpha/beta	0.01	0.01	1.15356e-16	1.04324e-16	Down
AT3G18060.1	transducin family protein / WD-40 repeat family protein	0.3	0.104	0.0105243	8.32685e-08	Down
AT4G31480.2	Coatomer, beta subunit	0.198	0.289	0.000273934	0.00448974	Down
AT1G20693.1	high mobility group B2	0.259	0.227	0.000863298	0.000355424	Down
AT1G76550.1	Phosphofructokinase family protein	0.01	0.01	1.15356e-16	1.04324e-16	Down
AT1G48470.1	glutamine synthetase 1;5	0.01	0.01	1.15356e-16	1.04324e-16	Down
AT5G20990.1	molybdopterin biosynthesis CNX1 protein / molybdenum cofactor biosynthesis enzyme CNX1 (CNX1)	0.134	0.01	1.61805e-06	1.04324e-16	Down
AT1G08200.1	UDP-D-apiose/UDP-D-xylose synthase 2	0.01	0.01	1.15356e-16	1.04324e-16	Down
AT3G15610.1	Transducin/WD40 repeat-like superfamily protein	0.01	0.01	1.15356e-16	1.04324e-16	Down
AT1G58290.1	Glutamyl-tRNA reductase family protein	0.01	0.01	1.15356e-16	1.04324e-16	Down
AT4G00490.1	beta-amylase 2	0.093	0.01	1.55247e-08	1.04324e-16	Down
AT2G42680.1	multiprotein bridging factor 1A	0.01	0.01	1.15356e-16	1.04324e-16	Down
AT1G63290.1	Aldolase-type TIM barrel family protein	0.01	0.01	1.15356e-16	1.04324e-16	Down
AT2G37790.1	NAD(P)-linked oxidoreductase superfamily protein	0.128	0.137	6.67067e-07	1.63651e-06	Down
AT1G51560.1	Pyridoxamine 5'-phosphate oxidase family protein	0.01	0.01	1.15356e-16	1.04324e-16	Down
AT5G47930.1	Zinc-binding ribosomal protein family protein	0.33	0.01	0.0197434	1.04324e-16	Down
AT4G28100.1	unknown protein; FUNCTIONS IN: molecular_function unknown; INVOLVED IN: biological_process unknown; LOCATED IN: anchored to plasma membrane, anchored to membrane; EXPRESSED IN: 23 plant structures; EXPRESSED DURING: 14 growth stages; BEST Arabidopsis thaliana protein match is: unknown protein (TAIR:AT3G18050.1); Has 30201 Blast hits to 17322 proteins in 780 species: Archae - 12; Bacteria - 1396; …	0.01	0.01	1.15356e-16	1.04324e-16	Down
AT5G08450.3	FUNCTIONS IN: molecular_function unknown; INVOLVED IN: biological_process unknown; LOCATED IN: cellular_component unknown; EXPRESSED IN: 25 plant structures; EXPRESSED DURING: 15 growth stages; CONTAINS InterPro DOMAIN/s: Histone deacetylation protein Rxt3 (InterPro:IPR013951); Has 34444 Blast hits to 20801 proteins in 1175 species: Archae - 64; Bacteria - 2390; Metazoa - 15568; Fungi - 3729; Pla…	0.01	0.01	1.15356e-16	1.04324e-16	Down
AT1G75030.1	thaumatin-like protein 3	0.01	0.094	1.15356e-16	9.19942e-09	Down
AT2G46520.1	cellular apoptosis susceptibility protein, putative / importin-alpha re-exporter, putative	0.01	0.143	1.15356e-16	2.90264e-05	Down
AT1G75460.1	ATP-dependent protease La (LON) domain protein	0.01	0.01	1.15356e-16	1.04324e-16	Down
AT1G18450.1	actin-related protein 4	0.112	0.126	2.23076e-07	7.98649e-06	Down
AT5G51840.1	unknown protein; Has 30201 Blast hits to 17322 proteins in 780 species: Archae - 12; Bacteria - 1396; Metazoa - 17338; Fungi - 3422; Plants - 5037; Viruses - 0; Other Eukaryotes - 2996 (source: NCBI BLink).	0.01	0.01	1.15356e-16	1.04324e-16	Down
AT2G36230.1	Aldolase-type TIM barrel family protein	0.01	0.01	1.15356e-16	1.04324e-16	Down
AT1G32440.1	plastidial pyruvate kinase 3	0.01	0.01	1.15356e-16	1.04324e-16	Down
AT4G31420.2	Zinc finger protein 622	0.01	0.01	1.15356e-16	1.04324e-16	Down
AT5G25070.1	unknown protein; FUNCTIONS IN: molecular_function unknown; INVOLVED IN: biological_process unknown; LOCATED IN: cellular_component unknown; EXPRESSED IN: 23 plant structures; EXPRESSED DURING: 13 growth stages; Has 1807 Blast hits to 1807 proteins in 277 species: Archae - 0; Bacteria - 0; Metazoa - 736; Fungi - 347; Plants - 385; Viruses - 0; Other Eukaryotes - 339 (source: NCBI BLink).	0.082	0.01	2.5497e-15	1.04324e-16	Down
AT1G11660.1	heat shock protein 70 (Hsp 70) family protein	0.01	0.01	1.15356e-16	1.04324e-16	Down
AT1G04810.1	26S proteasome regulatory complex, non-ATPase subcomplex, Rpn2/Psmd1 subunit	0.01	0.079	1.15356e-16	2.82087e-09	Down
AT4G04610.1	APS reductase 1	0.01	0.306	1.15356e-16	0.0175853	Down
AT3G04650.1	FAD/NAD(P)-binding oxidoreductase family protein	0.061	0.082	8.45054e-12	9.69667e-08	Down
AT5G52440.1	Bacterial sec-independent translocation protein mttA/Hcf106	0.01	0.01	1.15356e-16	1.04324e-16	Down
AT1G53165.3	Protein kinase superfamily protein	0.01	0.01	1.15356e-16	1.04324e-16	Down
AT1G64330.1	myosin heavy chain-related	0.01	0.01	1.15356e-16	1.04324e-16	Down
AT2G23610.1	methyl esterase 3	0.071	0.01	2.00191e-10	1.04324e-16	Down
AT1G48110.2	evolutionarily conserved C-terminal region 7	0.01	0.01	1.15356e-16	1.04324e-16	Down
AT4G10750.1	Phosphoenolpyruvate carboxylase family protein	0.01	0.01	1.15356e-16	1.04324e-16	Down
AT2G07360.2	SH3 domain-containing protein	0.152	0.187	9.39113e-06	0.000192286	Down
AT4G08950.1	Phosphate-responsive 1 family protein	0.01	0.01	1.15356e-16	1.04324e-16	Down
AT2G29540.3	RNApolymerase 14 kDa subunit	0.01	0.01	1.15356e-16	1.04324e-16	Down
AT3G45310.1	Cysteine proteinases superfamily protein	0.01	0.01	1.15356e-16	1.04324e-16	Down
AT3G18860.1	transducin family protein / WD-40 repeat family protein	0.01	0.01	1.15356e-16	1.04324e-16	Down
AT1G74880.1	NAD(P)H:plastoquinone dehydrogenase complex subunit O	0.015	0.01	1.15356e-16	1.04324e-16	Down
AT1G22430.1	GroES-like zinc-binding dehydrogenase family protein	0.01	0.01	1.15356e-16	1.04324e-16	Down
AT1G22520.2	Domain of unknown function (DUF543)	0.01	0.01	1.15356e-16	1.04324e-16	Down
AT1G62180.1	5'adenylylphosphosulfate reductase 2	0.293	0.327	0.00357113	0.0116562	Down
AT4G09020.1	isoamylase 3	0.01	0.01	1.15356e-16	1.04324e-16	Down
AT5G09850.1	Transcription elongation factor (TFIIS) family protein	0.01	0.01	1.15356e-16	1.04324e-16	Down
AT4G03430.1	pre-mRNA splicing factor-related	0.01	0.01	1.15356e-16	1.04324e-16	Down
AT1G09620.1	ATP binding;leucine-tRNA ligases;aminoacyl-tRNA ligases;nucleotide binding;ATP binding;aminoacyl-tRNA ligases	0.01	0.01	1.15356e-16	1.04324e-16	Down
ATCG00710.1	photosystem II reaction center protein H	0.01	0.01	1.15356e-16	1.04324e-16	Down
AT2G43770.1	Transducin/WD40 repeat-like superfamily protein	0.01	0.01	1.15356e-16	1.04324e-16	Down
AT1G15690.1	Inorganic H pyrophosphatase family protein	0.319	0.01	0.0211188	1.04324e-16	Down
AT3G17880.1	tetraticopeptide domain-containing thioredoxin	0.01	0.01	1.15356e-16	1.04324e-16	Down
AT3G48140.1	B12D protein	0.01	0.01	1.15356e-16	1.04324e-16	Down
AT1G64640.1	early nodulin-like protein 8	0.01	0.01	1.15356e-16	1.04324e-16	Down
AT5G37830.1	oxoprolinase 1	0.01	0.01	1.15356e-16	1.04324e-16	Down
AT1G21080.3	DNAJ heat shock N-terminal domain-containing protein	0.01	0.01	1.15356e-16	1.04324e-16	Down
AT2G31750.1	UDP-glucosyl transferase 74D1	0.01	0.099	1.15356e-16	8.60192e-09	Down
AT1G14570.1	UBX domain-containing protein	0.01	0.01	1.15356e-16	1.04324e-16	Down
AT4G10840.1	Tetratricopeptide repeat (TPR)-like superfamily protein	0.087	0.01	5.49812e-09	1.04324e-16	Down
AT5G48790.1	Domain of unknown function (DUF1995)	0.219	0.055	4.2144e-08	1.04324e-16	Down
AT2G35780.1	serine carboxypeptidase-like 26	0.01	0.116	1.15356e-16	1.18305e-06	Down
AT4G05090.1	Inositol monophosphatase family protein	0.113	0.01	1.76742e-07	1.04324e-16	Down
AT2G42690.1	alpha/beta-Hydrolases superfamily protein	0.089	0.01	1.08218e-08	1.04324e-16	Down
AT1G54060.1	6B-interacting protein 1-like 1	0.01	0.01	1.15356e-16	1.04324e-16	Down
AT2G29690.1	anthranilate synthase 2	0.01	0.01	1.15356e-16	1.04324e-16	Down
AT5G19855.1	Chaperonin-like RbcX protein	0.01	0.01	1.15356e-16	1.04324e-16	Down
AT2G20230.1	Tetraspanin family protein	0.01	0.01	1.15356e-16	1.04324e-16	Down
AT1G73460.1	Protein kinase superfamily protein	0.01	0.01	1.15356e-16	1.04324e-16	Down
AT5G16780.1	SART-1 family	0.01	0.01	1.15356e-16	1.04324e-16	Down
AT5G08650.1	Small GTP-binding protein	0.01	0.01	1.15356e-16	1.04324e-16	Down
AT5G17510.1	unknown protein; BEST Arabidopsis thaliana protein match is: unknown protein (TAIR:AT3G03460.1); Has 1807 Blast hits to 1807 proteins in 277 species: Archae - 0; Bacteria - 0; Metazoa - 736; Fungi - 347; Plants - 385; Viruses - 0; Other Eukaryotes - 339 (source: NCBI BLink).	0.01	0.01	1.15356e-16	1.04324e-16	Down
AT1G76850.1	exocyst complex component sec5	0.107	0.01	7.4115e-08	1.04324e-16	Down
AT2G05620.1	proton gradient regulation 5	0.117	0.01	2.58061e-07	1.04324e-16	Down
AT1G61040.1	plus-3 domain-containing protein	0.01	0.01	1.15356e-16	1.04324e-16	Down
AT2G24390.1	AIG2-like (avirulence induced gene) family protein	0.01	0.01	1.15356e-16	1.04324e-16	Down
AT1G48160.1	signal recognition particle 19 kDa protein, putative / SRP19, putative	0.112	0.01	3.68608e-07	1.04324e-16	Down
AT4G13730.1	Ypt/Rab-GAP domain of gyp1p superfamily protein	0.01	0.01	1.15356e-16	1.04324e-16	Down
AT3G43520.1	Transmembrane proteins 14C	0.01	0.01	1.15356e-16	1.04324e-16	Down
AT1G60550.1	enoyl-CoA hydratase/isomerase D	0.01	0.01	1.15356e-16	1.04324e-16	Down
AT4G31720.2	TBP-associated factor II 15	0.01	0.01	1.15356e-16	1.04324e-16	Down
AT5G13010.1	RNA helicase family protein	0.091	0.127	1.15356e-16	1.04324e-16	Down
AT2G16485.1	nucleic acid binding;zinc ion binding;DNA binding	0.01	0.01	1.15356e-16	1.04324e-16	Down
AT5G23280.1	TCP family transcription factor	0.01	0.01	1.15356e-16	1.04324e-16	Down
AT5G19180.1	E1 C-terminal related 1	0.01	0.01	1.15356e-16	1.04324e-16	Down
AT4G23040.1	Ubiquitin-like superfamily protein	0.01	0.01	1.15356e-16	1.04324e-16	Down
AT5G62440.1	Protein of unknown function (DUF3223)	0.235	0.154	2.20061e-07	7.6655e-09	Down
AT4G26100.1	casein kinase 1	0.01	0.01	1.15356e-16	1.04324e-16	Down
AT3G57810.3	Cysteine proteinases superfamily protein	0.01	0.01	1.15356e-16	1.04324e-16	Down
AT5G21090.1	Leucine-rich repeat (LRR) family protein	0.01	0.01	1.15356e-16	1.04324e-16	Down
AT5G54855.1	Pollen Ole e 1 allergen and extensin family protein	0.01	0.01	1.15356e-16	1.04324e-16	Down
AT2G38580.1	Mitochondrial ATP synthase D chain-related protein	0.01	0.115	1.15356e-16	3.85429e-06	Down
AT2G46140.1	Late embryogenesis abundant protein	0.01	0.01	1.15356e-16	1.04324e-16	Down
AT1G23900.1	gamma-adaptin 1	0.01	0.01	1.15356e-16	1.04324e-16	Down
AT1G17140.2	interactor of constitutive active rops 1	0.291	0.051	0.00364224	9.17053e-15	Down
AT2G33220.1	GRIM-19 protein	0.01	0.01	1.15356e-16	1.04324e-16	Down
AT5G10460.1	Haloacid dehalogenase-like hydrolase (HAD) superfamily protein	0.01	0.01	1.15356e-16	1.04324e-16	Down
AT1G76730.1	NagB/RpiA/CoA transferase-like superfamily protein	0.062	0.069	8.45408e-12	2.77351e-10	Down
AT1G33330.1	Class I peptide chain release factor	0.01	0.01	1.15356e-16	1.04324e-16	Down
AT1G74270.1	Ribosomal protein L35Ae family protein	3.04	3.455	0.00055276	0.00114543	Up
AT5G52640.1	heat shock protein 90.1	100	100	1.15356e-16	1.04324e-16	Up
AT3G32980.1	Peroxidase superfamily protein	100	100	1.15356e-16	1.04324e-16	Up
AT4G01290.1	unknown protein; FUNCTIONS IN: molecular_function unknown; INVOLVED IN: biological_process unknown; LOCATED IN: cellular_component unknown; EXPRESSED IN: 24 plant structures; EXPRESSED DURING: 15 growth stages; Has 1744 Blast hits to 1308 proteins in 219 species: Archae - 0; Bacteria - 241; Metazoa - 793; Fungi - 253; Plants - 108; Viruses - 0; Other Eukaryotes - 349 (source: NCBI BLink).	3.929	3.568	2.05105e-05	0.000273584	Up
AT1G11580.1	methylesterase PCR A	3.321	3.048	0.000103812	0.00168007	Up
AT3G27530.1	golgin candidate 6	100	100	1.15356e-16	1.04324e-16	Up
AT3G60190.1	DYNAMIN-like 1E	100	100	1.15356e-16	1.04324e-16	Up
AT3G59870.1	unknown protein; FUNCTIONS IN: molecular_function unknown; INVOLVED IN: biological_process unknown; LOCATED IN: chloroplast; EXPRESSED IN: 23 plant structures; EXPRESSED DURING: 13 growth stages; BEST Arabidopsis thaliana protein match is: unknown protein (TAIR:AT2G43945.1); Has 292 Blast hits to 292 proteins in 84 species: Archae - 0; Bacteria - 122; Metazoa - 0; Fungi - 0; Plants - 46; Viruses …	100	100	1.15356e-16	1.04324e-16	Up
AT1G10670.1	ATP-citrate lyase A-1	100	100	1.15356e-16	1.04324e-16	Up
AT2G14720.1	vacuolar sorting receptor 4	100	100	1.15356e-16	1.04324e-16	Up
AT2G33340.1	MOS4-associated complex 3B	100	100	1.15356e-16	1.04324e-16	Up
AT5G46860.1	Syntaxin/t-SNARE family protein	3.738	3.297	0.0118318	0.0484928	Up
AT5G64260.1	EXORDIUM like 2	19.137	21.832	1.15356e-16	7.73827e-13	Up
AT1G15750.1	Transducin family protein / WD-40 repeat family protein	100	100	1.15356e-16	1.04324e-16	Up
AT1G48420.1	D-cysteine desulfhydrase	100	100	1.15356e-16	1.04324e-16	Up
AT4G34230.1	cinnamyl alcohol dehydrogenase 5	11.547	100	3.02978e-09	1.04324e-16	Up
AT1G03030.1	P-loop containing nucleoside triphosphate hydrolases superfamily protein	100	100	1.15356e-16	1.04324e-16	Up
AT5G55200.1	Co-chaperone GrpE family protein	100	100	1.15356e-16	1.04324e-16	Up
AT1G48630.1	receptor for activated C kinase 1B	100	100	1.15356e-16	1.04324e-16	Up
AT1G06640.1	2-oxoglutarate (2OG) and Fe(II)-dependent oxygenase superfamily protein	10.689	10.435	1.15356e-16	4.60421e-15	Up
AT4G14160.1	Sec23/Sec24 protein transport family protein	100	100	1.15356e-16	1.04324e-16	Up
AT5G43970.1	translocase of outer membrane 22-V	100	100	1.15356e-16	1.04324e-16	Up
AT5G21160.3	LA RNA-binding protein	100	100	1.15356e-16	1.04324e-16	Up
AT3G43300.1	HOPM interactor 7	100	18.063	1.15356e-16	4.50145e-09	Up
AT5G22120.1	unknown protein; FUNCTIONS IN: molecular_function unknown; INVOLVED IN: biological_process unknown; LOCATED IN: cellular_component unknown; EXPRESSED IN: cultured cell; Has 30201 Blast hits to 17322 proteins in 780 species: Archae - 12; Bacteria - 1396; Metazoa - 17338; Fungi - 3422; Plants - 5037; Viruses - 0; Other Eukaryotes - 2996 (source: NCBI BLink).	100	100	1.15356e-16	1.04324e-16	Up
AT4G01480.1	pyrophosphorylase 5	9.341	100	4.80415e-07	1.04324e-16	Up
AT4G25890.1	60S acidic ribosomal protein family	100	100	1.15356e-16	1.04324e-16	Up
AT5G60160.1	Zn-dependent exopeptidases superfamily protein	100	100	1.15356e-16	1.04324e-16	Up
AT4G21585.1	endonuclease 4	100	100	1.15356e-16	1.04324e-16	Up
AT3G21110.1	purin 7	3.422	3.299	4.32833e-05	0.000352944	Up
AT4G05160.1	AMP-dependent synthetase and ligase family protein	5.123	3.134	0.000783837	0.0384545	Up
AT4G20860.1	FAD-binding Berberine family protein	3.861	4.045	1.15005e-05	1.33613e-05	Up
AT4G15560.1	Deoxyxylulose-5-phosphate synthase	100	100	1.15356e-16	1.04324e-16	Up
AT2G15860.1	unknown protein; FUNCTIONS IN: molecular_function unknown; INVOLVED IN: biological_process unknown; LOCATED IN: cellular_component unknown; EXPRESSED IN: 24 plant structures; EXPRESSED DURING: 13 growth stages; Has 30201 Blast hits to 17322 proteins in 780 species: Archae - 12; Bacteria - 1396; Metazoa - 17338; Fungi - 3422; Plants - 5037; Viruses - 0; Other Eukaryotes - 2996 (source: NCBI BLink).	100	100	1.15356e-16	1.04324e-16	Up
AT3G62140.1	CONTAINS InterPro DOMAIN/s: NEFA-interacting nuclear protein NIP30, N-terminal (InterPro:IPR019331); Has 398 Blast hits to 395 proteins in 139 species: Archae - 0; Bacteria - 6; Metazoa - 193; Fungi - 83; Plants - 36; Viruses - 0; Other Eukaryotes - 80 (source: NCBI BLink).	100	100	1.15356e-16	1.04324e-16	Up
AT4G30930.1	Ribosomal protein L21	100	100	1.15356e-16	1.04324e-16	Up
AT2G44200.1	CBF1-interacting co-repressor CIR, N-terminal;Pre-mRNA splicing factor	100	11.715	1.15356e-16	5.00454e-11	Up
AT5G08610.1	P-loop containing nucleoside triphosphate hydrolases superfamily protein	6.665	6.576	2.38846e-05	0.00026958	Up
AT5G19110.1	Eukaryotic aspartyl protease family protein	100	100	1.15356e-16	1.04324e-16	Up
ATCG00770.1	ribosomal protein S8	100	100	1.15356e-16	1.04324e-16	Up
AT4G23730.1	Galactose mutarotase-like superfamily protein	100	100	1.15356e-16	1.04324e-16	Up
AT5G46180.1	ornithine-delta-aminotransferase	100	100	1.15356e-16	1.04324e-16	Up
AT4G02610.1	Aldolase-type TIM barrel family protein	8.837	100	9.38441e-07	1.04324e-16	Up
AT3G49990.1	unknown protein; Has 1524 Blast hits to 1298 proteins in 225 species: Archae - 9; Bacteria - 84; Metazoa - 474; Fungi - 184; Plants - 98; Viruses - 17; Other Eukaryotes - 658 (source: NCBI BLink).	100	100	1.15356e-16	1.04324e-16	Up
AT5G57490.1	voltage dependent anion channel 4	100	100	1.15356e-16	1.04324e-16	Up
AT2G38730.1	Cyclophilin-like peptidyl-prolyl cis-trans isomerase family protein	100	100	1.15356e-16	1.04324e-16	Up
AT4G02720.1	unknown protein; FUNCTIONS IN: molecular_function unknown; INVOLVED IN: biological_process unknown; EXPRESSED IN: 25 plant structures; EXPRESSED DURING: 14 growth stages; CONTAINS InterPro DOMAIN/s: Protein of unknown function DUF926 (InterPro:IPR009269); Has 30201 Blast hits to 17322 proteins in 780 species: Archae - 12; Bacteria - 1396; Metazoa - 17338; Fungi - 3422; Plants - 5037; Viruses - 0;…	100	100	1.15356e-16	1.04324e-16	Up
AT5G23395.1	Cox19-like CHCH family protein	100	100	1.15356e-16	1.04324e-16	Up
AT3G08780.1	unknown protein; FUNCTIONS IN: molecular_function unknown; INVOLVED IN: biological_process unknown; LOCATED IN: cellular_component unknown; EXPRESSED IN: male gametophyte, cultured cell; EXPRESSED DURING: L mature pollen stage, M germinated pollen stage; Has 129 Blast hits to 129 proteins in 38 species: Archae - 0; Bacteria - 0; Metazoa - 96; Fungi - 0; Plants - 31; Viruses - 0; Other Eukaryotes …	100	100	1.15356e-16	1.04324e-16	Up
AT2G47250.1	RNA helicase family protein	100	100	1.15356e-16	1.04324e-16	Up
AT3G02630.1	Plant stearoyl-acyl-carrier-protein desaturase family protein	100	100	1.15356e-16	1.04324e-16	Up
AT2G28390.1	SAND family protein	9.375	100	4.80724e-07	1.04324e-16	Up
AT3G16670.1	Pollen Ole e 1 allergen and extensin family protein	3.511	3.247	0.0236289	0.0300253	Up
AT5G46160.1	Ribosomal protein L14p/L23e family protein	15.33	100	8.3984e-10	1.04324e-16	Up
AT4G21980.2	Ubiquitin-like superfamily protein	100	100	1.15356e-16	1.04324e-16	Up
AT4G32605.1	Mitochondrial glycoprotein family protein	100	11.363	1.15356e-16	9.17053e-15	Up
AT5G56170.1	LORELEI-LIKE-GPI-ANCHORED PROTEIN 1	100	100	1.15356e-16	1.04324e-16	Up
AT3G55520.1	FKBP-like peptidyl-prolyl cis-trans isomerase family protein	100	100	1.15356e-16	1.04324e-16	Up
AT4G13860.1	RNA-binding (RRM/RBD/RNP motifs) family protein	100	8.603	1.15356e-16	8.76941e-12	Up
AT1G01900.1	subtilase family protein	100	100	1.15356e-16	1.04324e-16	Up
AT1G06510.1	unknown protein; FUNCTIONS IN: molecular_function unknown; INVOLVED IN: biological_process unknown; LOCATED IN: chloroplast; EXPRESSED IN: 21 plant structures; EXPRESSED DURING: 13 growth stages; Has 376 Blast hits to 369 proteins in 152 species: Archae - 5; Bacteria - 113; Metazoa - 105; Fungi - 46; Plants - 27; Viruses - 2; Other Eukaryotes - 78 (source: NCBI BLink).	3.58	3.365	0.0122717	0.035239	Up
AT2G47580.1	spliceosomal protein U1A	3.315	3.153	3.91119e-08	3.50112e-08	Up
AT1G54460.1	TPX2 (targeting protein for Xklp2) protein family	10.462	100	1.49585e-07	1.04324e-16	Up
AT2G36145.1	unknown protein; FUNCTIONS IN: molecular_function unknown; INVOLVED IN: biological_process unknown; LOCATED IN: chloroplast thylakoid membrane, chloroplast stroma, chloroplast; EXPRESSED IN: 19 plant structures; EXPRESSED DURING: 13 growth stages; Has 49 Blast hits to 49 proteins in 17 species: Archae - 0; Bacteria - 0; Metazoa - 0; Fungi - 0; Plants - 49; Viruses - 0; Other Eukaryotes - 0 (sourc…	3.812	4.235	3.70566e-05	2.82763e-05	Up
AT4G18905.2	Transducin/WD40 repeat-like superfamily protein	10.908	11.11	5.07617e-15	1.65996e-13	Up
AT1G50380.1	Prolyl oligopeptidase family protein	100	100	1.15356e-16	1.04324e-16	Up
AT1G19000.1	Homeodomain-like superfamily protein	100	100	1.15356e-16	1.04324e-16	Up
AT1G64790.2	ILITYHIA	100	100	1.15356e-16	1.04324e-16	Up
AT5G22440.2	Ribosomal protein L1p/L10e family	0.01	1.943	1.15356e-16	0.463555		Down for (3dpi-AtGAP1 overexpressor line A) / (3dpi-empty vector )
AT2G04842.1	threonyl-tRNA synthetase, putative / threonine--tRNA ligase, putative	0.01	4.342	1.15356e-16	0.00213063		Down for (3dpi-AtGAP1 overexpressor line A) / (3dpi-empty vector )
AT3G52920.2	Family of unknown function (DUF662)	0.01	0.491	1.15356e-16	0.238844		Down for (3dpi-AtGAP1 overexpressor line A) / (3dpi-empty vector )
AT4G34740.1	GLN phosphoribosyl pyrophosphate amidotransferase 2	0.229	2.741	0.00137158	0.0428993		Down for (3dpi-AtGAP1 overexpressor line A) / (3dpi-empty vector )
AT1G74260.1	purine biosynthesis 4	0.01	0.622	1.15356e-16	0.491864		Down for (3dpi-AtGAP1 overexpressor line A) / (3dpi-empty vector )
AT2G46290.1	Transducin/WD40 repeat-like superfamily protein	0.01	0.824	1.15356e-16	0.90645		Down for (3dpi-AtGAP1 overexpressor line A) / (3dpi-empty vector )
AT1G80410.2	tetratricopeptide repeat (TPR)-containing protein	0.01	0.963	1.15356e-16	0.951233		Down for (3dpi-AtGAP1 overexpressor line A) / (3dpi-empty vector )
AT3G51880.1	high mobility group B1	0.22	1.31	0.00124868	0.9283		Down for (3dpi-AtGAP1 overexpressor line A) / (3dpi-empty vector )
AT5G49030.3	tRNA synthetase class I (I, L, M and V) family protein	0.01	1.292	1.15356e-16	0.9283		Down for (3dpi-AtGAP1 overexpressor line A) / (3dpi-empty vector )
AT2G33590.1	NAD(P)-binding Rossmann-fold superfamily protein	0.01	0.937	1.15356e-16	0.936166		Down for (3dpi-AtGAP1 overexpressor line A) / (3dpi-empty vector )
AT4G21960.1	Peroxidase superfamily protein	0.01	1.476	1.15356e-16	0.843331		Down for (3dpi-AtGAP1 overexpressor line A) / (3dpi-empty vector )
AT3G48860.2	unknown protein; INVOLVED IN: biological_process unknown; LOCATED IN: plasma membrane; EXPRESSED IN: 22 plant structures; EXPRESSED DURING: 13 growth stages; BEST Arabidopsis thaliana protein match is: unknown protein (TAIR:AT5G23700.1); Has 12429 Blast hits to 9751 proteins in 897 species: Archae - 180; Bacteria - 1190; Metazoa - 6552; Fungi - 1361; Plants - 886; Viruses - 50; Other Eukaryotes -…	0.109	1.267	7.4115e-08	0.93136		Down for (3dpi-AtGAP1 overexpressor line A) / (3dpi-empty vector )
AT3G19480.1	D-3-phosphoglycerate dehydrogenase	0.01	1.953	1.15356e-16	0.481526		Down for (3dpi-AtGAP1 overexpressor line A) / (3dpi-empty vector )
AT2G17240.1	unknown protein; FUNCTIONS IN: molecular_function unknown; INVOLVED IN: biological_process unknown; LOCATED IN: chloroplast; EXPRESSED IN: 23 plant structures; EXPRESSED DURING: 14 growth stages; BEST Arabidopsis thaliana protein match is: unknown protein (TAIR:AT3G24506.1); Has 2795 Blast hits to 943 proteins in 155 species: Archae - 0; Bacteria - 388; Metazoa - 809; Fungi - 72; Plants - 153; Vi…	0.256	0.885	1.85758e-05	0.91702		Down for (3dpi-AtGAP1 overexpressor line A) / (3dpi-empty vector )
AT1G15950.1	cinnamoyl coa reductase 1	0.099	1.355	6.83987e-08	0.898416		Down for (3dpi-AtGAP1 overexpressor line A) / (3dpi-empty vector )
AT3G21200.1	proton gradient regulation 7	0.116	2.085	2.83949e-07	0.433052		Down for (3dpi-AtGAP1 overexpressor line A) / (3dpi-empty vector )
AT2G21160.1	Translocon-associated protein (TRAP), alpha subunit	0.01	0.941	1.15356e-16	0.936166		Down for (3dpi-AtGAP1 overexpressor line A) / (3dpi-empty vector )
AT4G22010.1	SKU5 similar 4	0.01	1.23	1.15356e-16	0.936166		Down for (3dpi-AtGAP1 overexpressor line A) / (3dpi-empty vector )
AT3G56460.1	GroES-like zinc-binding alcohol dehydrogenase family protein	0.01	1.346	1.15356e-16	0.915322		Down for (3dpi-AtGAP1 overexpressor line A) / (3dpi-empty vector )
AT2G29560.1	cytosolic enolase	0.01	1.001	1.15356e-16	0.982418		Down for (3dpi-AtGAP1 overexpressor line A) / (3dpi-empty vector )
AT4G36800.1	RUB1 conjugating enzyme 1	0.01	0.624	1.15356e-16	0.559282		Down for (3dpi-AtGAP1 overexpressor line A) / (3dpi-empty vector )
AT3G04590.2	AT hook motif DNA-binding family protein	0.01	1.355	1.15356e-16	0.889595		Down for (3dpi-AtGAP1 overexpressor line A) / (3dpi-empty vector )
AT4G31180.2	Class II aminoacyl-tRNA and biotin synthetases superfamily protein	0.01	0.659	1.15356e-16	0.542744		Down for (3dpi-AtGAP1 overexpressor line A) / (3dpi-empty vector )
AT1G28060.1	Pre-mRNA-splicing factor 3	0.01	0.849	1.15356e-16	0.914522		Down for (3dpi-AtGAP1 overexpressor line A) / (3dpi-empty vector )
AT2G34430.1	light-harvesting chlorophyll-protein complex II subunit B1	0.01	1.776	1.15356e-16	0.604548		Down for (3dpi-AtGAP1 overexpressor line A) / (3dpi-empty vector )
AT4G24270.2	EMBRYO DEFECTIVE 140	0.01	0.78	1.15356e-16	0.846955		Down for (3dpi-AtGAP1 overexpressor line A) / (3dpi-empty vector )
AT2G38750.1	annexin 4	0.074	1.073	3.72877e-11	0.999904		Down for (3dpi-AtGAP1 overexpressor line A) / (3dpi-empty vector )
AT4G15110.1	cytochrome P450, family 97, subfamily B, polypeptide 3	0.086	1.318	2.53093e-09	0.918484		Down for (3dpi-AtGAP1 overexpressor line A) / (3dpi-empty vector )
AT3G07100.1	Sec23/Sec24 protein transport family protein	0.096	0.517	1.15356e-16	0.148322		Down for (3dpi-AtGAP1 overexpressor line A) / (3dpi-empty vector )
AT3G47560.2	alpha/beta-Hydrolases superfamily protein	0.075	1.058	7.93057e-11	0.999904		Down for (3dpi-AtGAP1 overexpressor line A) / (3dpi-empty vector )
AT5G46800.1	Mitochondrial substrate carrier family protein	0.01	2.07	1.15356e-16	0.404277		Down for (3dpi-AtGAP1 overexpressor line A) / (3dpi-empty vector )
AT5G44316.1	Stabilizer of iron transporter SufD superfamily protein	0.225	0.6	1.42218e-07	0.258106		Down for (3dpi-AtGAP1 overexpressor line A) / (3dpi-empty vector )
AT5G61970.1	signal recognition particle-related / SRP-related	0.01	0.681	1.15356e-16	0.624124		Down for (3dpi-AtGAP1 overexpressor line A) / (3dpi-empty vector )
AT2G26730.1	Leucine-rich repeat protein kinase family protein	0.116	2.417	1.01795e-07	0.3031		Down for (3dpi-AtGAP1 overexpressor line A) / (3dpi-empty vector )
AT4G15900.1	pleiotropic regulatory locus 1	0.01	0.889	1.15356e-16	0.936166		Down for (3dpi-AtGAP1 overexpressor line A) / (3dpi-empty vector )
AT1G45230.1	Protein of unknown function (DUF3223)	0.01	0.592	1.15356e-16	0.420377		Down for (3dpi-AtGAP1 overexpressor line A) / (3dpi-empty vector )
AT4G18930.1	RNA ligase/cyclic nucleotide phosphodiesterase family protein	0.238	9.053	0.0016599	4.32442e-07		Down for (3dpi-AtGAP1 overexpressor line A) / (3dpi-empty vector )
AT1G20580.1	Small nuclear ribonucleoprotein family protein	0.01	0.704	1.15356e-16	0.7762		Down for (3dpi-AtGAP1 overexpressor line A) / (3dpi-empty vector )
AT3G20630.1	ubiquitin-specific protease 14	0.11	1.24	2.01209e-07	0.936166		Down for (3dpi-AtGAP1 overexpressor line A) / (3dpi-empty vector )
AT1G69030.1	BSD domain-containing protein	0.084	0.74	1.72687e-09	0.797628		Down for (3dpi-AtGAP1 overexpressor line A) / (3dpi-empty vector )
AT3G21790.1	UDP-Glycosyltransferase superfamily protein	0.01	0.818	1.15356e-16	0.889595		Down for (3dpi-AtGAP1 overexpressor line A) / (3dpi-empty vector )
AT1G55080.1	MED9; BEST Arabidopsis thaliana protein match is: unknown protein (TAIR:AT1G29580.1); Has 67203 Blast hits to 25757 proteins in 1293 species: Archae - 12; Bacteria - 4374; Metazoa - 24340; Fungi - 7940; Plants - 5927; Viruses - 273; Other Eukaryotes - 24337 (source: NCBI BLink).	0.01	0.78	1.15356e-16	0.849723		Down for (3dpi-AtGAP1 overexpressor line A) / (3dpi-empty vector )
AT2G24820.1	translocon at the inner envelope membrane of chloroplasts 55-II	0.106	1.419	7.59695e-15	0.807579		Down for (3dpi-AtGAP1 overexpressor line A) / (3dpi-empty vector )
AT3G23980.1	BLISTER	0.01	1.591	1.15356e-16	0.742835		Down for (3dpi-AtGAP1 overexpressor line A) / (3dpi-empty vector )
AT2G45140.1	plant VAP homolog 12	0.01	1.672	1.15356e-16	0.648736		Down for (3dpi-AtGAP1 overexpressor line A) / (3dpi-empty vector )
AT3G20120.1	cytochrome P450, family 705, subfamily A, polypeptide 21	0.01	1.304	1.15356e-16	0.821086		Down for (3dpi-AtGAP1 overexpressor line A) / (3dpi-empty vector )
AT5G56290.1	peroxin 5	0.279	0.448	3.48993e-05	0.0439317		Down for (3dpi-AtGAP1 overexpressor line A) / (3dpi-empty vector )
AT5G67150.1	HXXXD-type acyl-transferase family protein	0.01	1.908	1.15356e-16	0.467217		Down for (3dpi-AtGAP1 overexpressor line A) / (3dpi-empty vector )
AT3G09250.2	Nuclear transport factor 2 (NTF2) family protein	0.01	0.789	1.15356e-16	0.806052		Down for (3dpi-AtGAP1 overexpressor line A) / (3dpi-empty vector )
AT1G02140.1	mago nashi family protein	0.01	0.546	1.15356e-16	0.396607		Down for (3dpi-AtGAP1 overexpressor line A) / (3dpi-empty vector )
AT1G35580.2	cytosolic invertase 1	0.01	1.174	1.15356e-16	0.93004		Down for (3dpi-AtGAP1 overexpressor line A) / (3dpi-empty vector )
AT2G03150.1	ATP/GTP-binding protein family	0.01	3.163	1.15356e-16	0.0888073		Down for (3dpi-AtGAP1 overexpressor line A) / (3dpi-empty vector )
AT5G48335.1	unknown protein; FUNCTIONS IN: molecular_function unknown; INVOLVED IN: biological_process unknown; LOCATED IN: chloroplast; BEST Arabidopsis thaliana protein match is: unknown protein (TAIR:AT3G07580.1); Has 35333 Blast hits to 34131 proteins in 2444 species: Archae - 798; Bacteria - 22429; Metazoa - 974; Fungi - 991; Plants - 531; Viruses - 0; Other Eukaryotes - 9610 (source: NCBI BLink).	0.01	1.544	1.15356e-16	0.782692		Down for (3dpi-AtGAP1 overexpressor line A) / (3dpi-empty vector )
AT4G33030.1	sulfoquinovosyldiacylglycerol 1	0.112	1.406	7.4115e-08	0.883462		Down for (3dpi-AtGAP1 overexpressor line A) / (3dpi-empty vector )
AT3G06810.1	acyl-CoA dehydrogenase-related	0.01	1.009	1.15356e-16	0.980793		Down for (3dpi-AtGAP1 overexpressor line A) / (3dpi-empty vector )
AT3G14240.1	Subtilase family protein	0.01	0.941	1.15356e-16	0.940216		Down for (3dpi-AtGAP1 overexpressor line A) / (3dpi-empty vector )
AT1G16030.1	heat shock protein 70B	100		1.15356e-16			Up for (3dpi-AtGAP1 overexpressor line A) / (3dpi-empty vector )
AT1G69410.1	eukaryotic elongation factor 5A-3	5.961	1.475	3.00621e-05	0.811515		Up for (3dpi-AtGAP1 overexpressor line A) / (3dpi-empty vector )
AT4G00660.1	RNAhelicase-like 8	8.839	1.459	3.24466e-07	0.832548		Up for (3dpi-AtGAP1 overexpressor line A) / (3dpi-empty vector )
AT5G14540.1	Protein of unknown function (DUF1421)	3.399	1.95	0.0118498	0.232947		Up for (3dpi-AtGAP1 overexpressor line A) / (3dpi-empty vector )
AT1G19870.1	IQ-domain 32	13.61	1.515	6.1853e-10	0.793502		Up for (3dpi-AtGAP1 overexpressor line A) / (3dpi-empty vector )
AT5G22580.1	Stress responsive A/B Barrel Domain	4.93	2.865	2.47484e-09	0.000551816		Up for (3dpi-AtGAP1 overexpressor line A) / (3dpi-empty vector )
AT2G44350.2	Citrate synthase family protein	3.467	1.522	0.000105849	0.524699		Up for (3dpi-AtGAP1 overexpressor line A) / (3dpi-empty vector )
AT5G03650.1	starch branching enzyme 2.2	7.47	0.01	6.25029e-06	1.04324e-16		Up for (3dpi-AtGAP1 overexpressor line A) / (3dpi-empty vector )
AT2G31370.1	Basic-leucine zipper (bZIP) transcription factor family protein	3.448	1.86	8.56417e-05	0.233299		Up for (3dpi-AtGAP1 overexpressor line A) / (3dpi-empty vector )
AT4G35460.1	NADPH-dependent thioredoxin reductase B	8.986	0.677	2.67227e-07	0.613083		Up for (3dpi-AtGAP1 overexpressor line A) / (3dpi-empty vector )
AT4G32640.2	Sec23/Sec24 protein transport family protein	100	100	1.15356e-16	1.04324e-16		Up for (3dpi-AtGAP1 overexpressor line A) / (3dpi-empty vector )
AT3G46040.1	ribosomal protein S15A D	100	100	1.15356e-16	1.04324e-16		Up for (3dpi-AtGAP1 overexpressor line A) / (3dpi-empty vector )
AT5G42390.1	Insulinase (Peptidase family M16) family protein	4.017	0.23	0.00432275	0.001095		Up for (3dpi-AtGAP1 overexpressor line A) / (3dpi-empty vector )
AT1G60780.1	Clathrin adaptor complexes medium subunit family protein	100	1	1.15356e-16	0.977854		Up for (3dpi-AtGAP1 overexpressor line A) / (3dpi-empty vector )
AT5G65840.1	Thioredoxin superfamily protein	9.497	1.122	2.5497e-15	0.959539		Up for (3dpi-AtGAP1 overexpressor line A) / (3dpi-empty vector )
AT4G10100.2	co-factor for nitrate, reductase and xanthine dehydrogenase 7	3.272	1.721	0.023091	0.604817		Up for (3dpi-AtGAP1 overexpressor line A) / (3dpi-empty vector )
AT3G43980.1	Ribosomal protein S14p/S29e family protein	3.634	0.242	5.56219e-05	8.91176e-06		Up for (3dpi-AtGAP1 overexpressor line A) / (3dpi-empty vector )
AT1G15120.2	Ubiquinol-cytochrome C reductase hinge protein	100		1.15356e-16			Up for (3dpi-AtGAP1 overexpressor line A) / (3dpi-empty vector )
AT5G47030.1	ATPase, F1 complex, delta/epsilon subunit	3.25	2.995	4.90805e-06	6.36387e-06		Up for (3dpi-AtGAP1 overexpressor line A) / (3dpi-empty vector )
AT5G08080.3	syntaxin of plants 132	3.106	2.016	0.0427457	0.46379		Up for (3dpi-AtGAP1 overexpressor line A) / (3dpi-empty vector )
AT3G48330.1	protein-l-isoaspartate methyltransferase 1	17.172	1	2.77923e-12	0.973707		Up for (3dpi-AtGAP1 overexpressor line A) / (3dpi-empty vector )
AT5G08000.1	glucan endo-1,3-beta-glucosidase-like protein 3	100	100	1.15356e-16	1.04324e-16		Up for (3dpi-AtGAP1 overexpressor line A) / (3dpi-empty vector )
AT5G25610.1	BURP domain-containing protein	13.666	2.128	1.15356e-16	0.0861592		Up for (3dpi-AtGAP1 overexpressor line A) / (3dpi-empty vector )
AT3G54600.1	Class I glutamine amidotransferase-like superfamily protein	3.892	2.787	0.00352068	0.0817349		Up for (3dpi-AtGAP1 overexpressor line A) / (3dpi-empty vector )
AT2G18510.1	RNA-binding (RRM/RBD/RNP motifs) family protein	3.42	2.106	0.027886	0.386631		Up for (3dpi-AtGAP1 overexpressor line A) / (3dpi-empty vector )
AT3G25690.2	Hydroxyproline-rich glycoprotein family protein	3.302	0.01	0.00188757	1.04324e-16		Up for (3dpi-AtGAP1 overexpressor line A) / (3dpi-empty vector )
AT5G13520.1	peptidase M1 family protein	9.863	0.01	1.40888e-07	1.04324e-16		Up for (3dpi-AtGAP1 overexpressor line A) / (3dpi-empty vector )
AT4G31360.1	selenium binding	100	0.01	1.15356e-16	1.04324e-16		Up for (3dpi-AtGAP1 overexpressor line A) / (3dpi-empty vector )
AT3G42170.1	BED zinc finger ;hAT family dimerisation domain	6.934	0.594	7.49181e-06	0.577149		Up for (3dpi-AtGAP1 overexpressor line A) / (3dpi-empty vector )
AT4G30720.1	FAD/NAD(P)-binding oxidoreductase family protein	100	0.01	1.15356e-16	1.04324e-16		Up for (3dpi-AtGAP1 overexpressor line A) / (3dpi-empty vector )
AT1G16730.1	unknown protein 6	100	1	1.15356e-16	0.980793		Up for (3dpi-AtGAP1 overexpressor line A) / (3dpi-empty vector )
AT3G09300.1	OSBP(oxysterol binding protein)-related protein 3B	100	100	1.15356e-16	1.04324e-16		Up for (3dpi-AtGAP1 overexpressor line A) / (3dpi-empty vector )
AT1G01940.1	Cyclophilin-like peptidyl-prolyl cis-trans isomerase family protein	9.16	1.225	5.61833e-07	0.93911		Up for (3dpi-AtGAP1 overexpressor line A) / (3dpi-empty vector )
AT3G07670.1	Rubisco methyltransferase family protein	100		1.15356e-16			Up for (3dpi-AtGAP1 overexpressor line A) / (3dpi-empty vector )
AT1G79650.4	Rad23 UV excision repair protein family	3.054	2.175	0.0467478	0.310352		Up for (3dpi-AtGAP1 overexpressor line A) / (3dpi-empty vector )
AT5G25220.1	KNOTTED1-like homeobox gene 3	9.819	0.01	1.76742e-07	1.04324e-16		Up for (3dpi-AtGAP1 overexpressor line A) / (3dpi-empty vector )
AT1G10310.1	NAD(P)-binding Rossmann-fold superfamily protein	100	1	1.15356e-16	0.973707		Up for (3dpi-AtGAP1 overexpressor line A) / (3dpi-empty vector )
AT3G12110.1	actin-11	2.816	0.01	0.0841895	1.04324e-16		Down for (3dpi-AtGAP1 overexpressor line C) / (3dpi-empty vector )
AT3G23810.1	S-adenosyl-l-homocysteine (SAH) hydrolase 2	0.426	0.324	0.0133885	0.000819216		Down for (3dpi-AtGAP1 overexpressor line C) / (3dpi-empty vector )
AT2G42100.1	Actin-like ATPase superfamily protein	0.863	0.01	0.905295	1.04324e-16		Down for (3dpi-AtGAP1 overexpressor line C) / (3dpi-empty vector )
AT5G10470.2	kinesin like protein for actin based chloroplast movement 1	0.696	0.102	0.72795	4.84416e-07		Down for (3dpi-AtGAP1 overexpressor line C) / (3dpi-empty vector )
AT4G30190.2	H(+)-ATPase 2	1.296	0.01	0.908995	1.04324e-16		Down for (3dpi-AtGAP1 overexpressor line C) / (3dpi-empty vector )
AT1G60950.1	2Fe-2S ferredoxin-like superfamily protein	2.551	0.01	0.0103273	1.04324e-16		Down for (3dpi-AtGAP1 overexpressor line C) / (3dpi-empty vector )
AT4G13010.1	Oxidoreductase, zinc-binding dehydrogenase family protein	0.595	0.069	0.528733	2.01467e-10		Down for (3dpi-AtGAP1 overexpressor line C) / (3dpi-empty vector )
ATCG00680.1	photosystem II reaction center protein B	1.13	0.265	0.988192	0.00267204		Down for (3dpi-AtGAP1 overexpressor line C) / (3dpi-empty vector )
AT1G16810.1	unknown protein; CONTAINS InterPro DOMAIN/s: Protein of unknown function DUF1754, eukaryotic (InterPro:IPR013865); Has 395 Blast hits to 394 proteins in 162 species: Archae - 0; Bacteria - 0; Metazoa - 181; Fungi - 91; Plants - 65; Viruses - 0; Other Eukaryotes - 58 (source: NCBI BLink).	0.56	0.01	0.40354	1.04324e-16		Down for (3dpi-AtGAP1 overexpressor line C) / (3dpi-empty vector )
AT2G27510.1	ferredoxin 3	0.614	0.01	0.514642	1.04324e-16		Down for (3dpi-AtGAP1 overexpressor line C) / (3dpi-empty vector )
AT4G01610.1	Cysteine proteinases superfamily protein	0.963	0.01	0.963731	1.04324e-16		Down for (3dpi-AtGAP1 overexpressor line C) / (3dpi-empty vector )
AT5G42190.1	E3 ubiquitin ligase SCF complex subunit SKP1/ASK1 family protein	0.771	0.01	0.84726	1.04324e-16		Down for (3dpi-AtGAP1 overexpressor line C) / (3dpi-empty vector )
AT1G31230.1	aspartate kinase-homoserine dehydrogenase i	0.816	0.141	0.893947	2.36079e-06		Down for (3dpi-AtGAP1 overexpressor line C) / (3dpi-empty vector )
AT5G42390.1	Insulinase (Peptidase family M16) family protein	4.017	0.23	0.00432275	0.001095		Down for (3dpi-AtGAP1 overexpressor line C) / (3dpi-empty vector )
AT3G27310.1	plant UBX domain-containing protein 1	0.878	0.01	0.941116	1.04324e-16		Down for (3dpi-AtGAP1 overexpressor line C) / (3dpi-empty vector )
AT2G05520.5	glycine-rich protein 3	1.938	0.01	0.45485	1.04324e-16		Down for (3dpi-AtGAP1 overexpressor line C) / (3dpi-empty vector )
AT1G70070.1	DEAD/DEAH box helicase, putative	2.497	0.101	0.162914	7.97663e-07		Down for (3dpi-AtGAP1 overexpressor line C) / (3dpi-empty vector )
AT3G43980.1	Ribosomal protein S14p/S29e family protein	3.634	0.242	5.56219e-05	8.91176e-06		Down for (3dpi-AtGAP1 overexpressor line C) / (3dpi-empty vector )
AT3G26340.1	N-terminal nucleophile aminohydrolases (Ntn hydrolases) superfamily protein	0.679	0.01	0.631405	1.04324e-16		Down for (3dpi-AtGAP1 overexpressor line C) / (3dpi-empty vector )
AT1G66530.1	Arginyl-tRNA synthetase, class Ic	0.699	0.01	0.720465	1.04324e-16		Down for (3dpi-AtGAP1 overexpressor line C) / (3dpi-empty vector )
AT5G08180.2	Ribosomal protein L7Ae/L30e/S12e/Gadd45 family protein	0.595	0.077	0.521187	7.56573e-10		Down for (3dpi-AtGAP1 overexpressor line C) / (3dpi-empty vector )
ATMG00070.1	NADH dehydrogenase subunit 9	0.495	0.01	0.260392	1.04324e-16		Down for (3dpi-AtGAP1 overexpressor line C) / (3dpi-empty vector )
AT4G33650.2	dynamin-related protein 3A	0.947	0.01	0.972593	1.04324e-16		Down for (3dpi-AtGAP1 overexpressor line C) / (3dpi-empty vector )
AT4G34030.1	3-methylcrotonyl-CoA carboxylase	0.979	0.01	0.986764	1.04324e-16		Down for (3dpi-AtGAP1 overexpressor line C) / (3dpi-empty vector )
AT5G52650.1	RNA binding Plectin/S10 domain-containing protein	1.46	0.11	0.849928	9.65331e-07		Down for (3dpi-AtGAP1 overexpressor line C) / (3dpi-empty vector )
AT2G29290.2	NAD(P)-binding Rossmann-fold superfamily protein	0.978	0.084	0.982955	6.59168e-08		Down for (3dpi-AtGAP1 overexpressor line C) / (3dpi-empty vector )
AT4G21110.1	G10 family protein	0.626	0.128	0.344663	2.25055e-09		Down for (3dpi-AtGAP1 overexpressor line C) / (3dpi-empty vector )
AT1G53645.1	hydroxyproline-rich glycoprotein family protein	0.878	0.211	0.937466	0.000618469		Down for (3dpi-AtGAP1 overexpressor line C) / (3dpi-empty vector )
AT2G21370.1	xylulose kinase-1	0.756	0.01	0.855535	1.04324e-16		Down for (3dpi-AtGAP1 overexpressor line C) / (3dpi-empty vector )
AT3G25690.2	Hydroxyproline-rich glycoprotein family protein	3.302	0.01	0.00188757	1.04324e-16		Down for (3dpi-AtGAP1 overexpressor line C) / (3dpi-empty vector )
AT5G06410.1	DNAJ heat shock N-terminal domain-containing protein	0.988	0.091	0.985297	5.47043e-08		Down for (3dpi-AtGAP1 overexpressor line C) / (3dpi-empty vector )
AT5G17440.1	LUC7 related protein	1.454	0.01	0.855535	1.04324e-16		Down for (3dpi-AtGAP1 overexpressor line C) / (3dpi-empty vector )
AT5G04885.1	Glycosyl hydrolase family protein	1.782	0.01	0.629599	1.04324e-16		Down for (3dpi-AtGAP1 overexpressor line C) / (3dpi-empty vector )
AT2G24850.1	tyrosine aminotransferase 3	0.608	0.01	0.550644	1.04324e-16		Down for (3dpi-AtGAP1 overexpressor line C) / (3dpi-empty vector )
AT1G67865.1	unknown protein; BEST Arabidopsis thaliana protein match is: unknown protein (TAIR:AT1G67860.1); Has 13 Blast hits to 13 proteins in 2 species: Archae - 0; Bacteria - 0; Metazoa - 0; Fungi - 0; Plants - 13; Viruses - 0; Other Eukaryotes - 0 (source: NCBI BLink).	1.554	0.111	0.762174	3.22848e-07		Down for (3dpi-AtGAP1 overexpressor line C) / (3dpi-empty vector )
AT3G11200.1	alfin-like 2	0.451	0.01	0.207177	1.04324e-16		Down for (3dpi-AtGAP1 overexpressor line C) / (3dpi-empty vector )
AT1G80050.1	adenine phosphoribosyl transferase 2	1.813	0.01	0.55453	1.04324e-16		Down for (3dpi-AtGAP1 overexpressor line C) / (3dpi-empty vector )
AT1G16520.1	unknown protein; FUNCTIONS IN: molecular_function unknown; INVOLVED IN: biological_process unknown; LOCATED IN: plasma membrane; EXPRESSED IN: 22 plant structures; EXPRESSED DURING: 13 growth stages; BEST Arabidopsis thaliana protein match is: unknown protein (TAIR:AT1G56080.1); Has 243 Blast hits to 234 proteins in 69 species: Archae - 2; Bacteria - 2; Metazoa - 61; Fungi - 9; Plants - 125; Viru…	0.728	0.01	0.794946	1.04324e-16		Down for (3dpi-AtGAP1 overexpressor line C) / (3dpi-empty vector )
AT4G30000.2	Dihydropterin pyrophosphokinase / Dihydropteroate synthase	0.959	0.082	0.959059	3.55048e-10		Down for (3dpi-AtGAP1 overexpressor line C) / (3dpi-empty vector )
AT5G66470.1	RNA binding;GTP binding	3.025	0.01	0.0549913	1.04324e-16		Down for (3dpi-AtGAP1 overexpressor line C) / (3dpi-empty vector )
AT1G30530.1	UDP-glucosyl transferase 78D1	1.193	0.01	0.955465	1.04324e-16		Down for (3dpi-AtGAP1 overexpressor line C) / (3dpi-empty vector )
AT3G46740.1	translocon at the outer envelope membrane of chloroplasts 75-III	1.103	0.01	0.991173	1.04324e-16		Down for (3dpi-AtGAP1 overexpressor line C) / (3dpi-empty vector )
AT4G30220.2	small nuclear ribonucleoprotein F	1.631	0.01	0.656367	1.04324e-16		Down for (3dpi-AtGAP1 overexpressor line C) / (3dpi-empty vector )
AT2G18990.1	thioredoxin domain-containing protein 9 homolog	0.583	0.01	0.492064	1.04324e-16		Down for (3dpi-AtGAP1 overexpressor line C) / (3dpi-empty vector )
AT3G22600.1	Bifunctional inhibitor/lipid-transfer protein/seed storage 2S albumin superfamily protein	2.42	0.01	0.0197525	1.04324e-16		Down for (3dpi-AtGAP1 overexpressor line C) / (3dpi-empty vector )
AT2G42910.1	Phosphoribosyltransferase family protein	0.873	0.01	0.936823	1.04324e-16		Down for (3dpi-AtGAP1 overexpressor line C) / (3dpi-empty vector )
AT1G69840.7	SPFH/Band 7/PHB domain-containing membrane-associated protein family	1.434	0.01	0.84726	1.04324e-16		Down for (3dpi-AtGAP1 overexpressor line C) / (3dpi-empty vector )
AT3G50520.1	Phosphoglycerate mutase family protein	1.27	0.01	0.91562	1.04324e-16		Down for (3dpi-AtGAP1 overexpressor line C) / (3dpi-empty vector )
AT2G32230.1	proteinaceous RNase P 1	1.056	0.01	0.993896	1.04324e-16		Down for (3dpi-AtGAP1 overexpressor line C) / (3dpi-empty vector )
AT2G39260.1	binding;RNA binding	0.673	0.01	0.516852	1.04324e-16		Down for (3dpi-AtGAP1 overexpressor line C) / (3dpi-empty vector )
AT1G05720.1	selenoprotein family protein	0.969	0.01	0.965365	1.04324e-16		Down for (3dpi-AtGAP1 overexpressor line C) / (3dpi-empty vector )
AT4G13550.1	triglyceride lipases;triglyceride lipases	1.109	0.01	0.990177	1.04324e-16		Down for (3dpi-AtGAP1 overexpressor line C) / (3dpi-empty vector )
AT3G01090.2	SNF1 kinase homolog 10	1.831	0.144	0.541033	5.47218e-05		Down for (3dpi-AtGAP1 overexpressor line C) / (3dpi-empty vector )
AT1G78510.1	solanesyl diphosphate synthase 1	0.92	0.01	0.94536	1.04324e-16		Down for (3dpi-AtGAP1 overexpressor line C) / (3dpi-empty vector )
AT5G30490.2	FUNCTIONS IN: molecular_function unknown; INVOLVED IN: biological_process unknown; LOCATED IN: cellular_component unknown; EXPRESSED IN: 22 plant structures; EXPRESSED DURING: 13 growth stages; CONTAINS InterPro DOMAIN/s: Craniofacial development protein 1/Bucentaur (InterPro:IPR011421); Has 333 Blast hits to 324 proteins in 149 species: Archae - 0; Bacteria - 18; Metazoa - 117; Fungi - 96; Plant…	1.167	0.117	0.962738	2.91029e-06		Down for (3dpi-AtGAP1 overexpressor line C) / (3dpi-empty vector )
AT5G19760.1	Mitochondrial substrate carrier family protein	0.741	0.01	0.78558	1.04324e-16		Down for (3dpi-AtGAP1 overexpressor line C) / (3dpi-empty vector )
AT1G63310.1	unknown protein; BEST Arabidopsis thaliana protein match is: unknown protein (TAIR:AT2G20362.1); Has 78 Blast hits to 77 proteins in 11 species: Archae - 0; Bacteria - 0; Metazoa - 0; Fungi - 0; Plants - 78; Viruses - 0; Other Eukaryotes - 0 (source: NCBI BLink).	0.998	0.01	0.990982	1.04324e-16		Down for (3dpi-AtGAP1 overexpressor line C) / (3dpi-empty vector )
AT3G57520.1	seed imbibition 2	0.768	0.01	0.85168	1.04324e-16		Down for (3dpi-AtGAP1 overexpressor line C) / (3dpi-empty vector )
AT5G44520.1	NagB/RpiA/CoA transferase-like superfamily protein	0.817	0.01	0.905295	1.04324e-16		Down for (3dpi-AtGAP1 overexpressor line C) / (3dpi-empty vector )
AT4G14320.2	Zinc-binding ribosomal protein family protein	0.632	0.01	0.640697	1.04324e-16		Down for (3dpi-AtGAP1 overexpressor line C) / (3dpi-empty vector )
AT1G66130.1	NAD(P)-binding Rossmann-fold superfamily protein	0.838	0.01	0.895921	1.04324e-16		Down for (3dpi-AtGAP1 overexpressor line C) / (3dpi-empty vector )
AT3G53180.1	glutamate-ammonia ligases;catalytics;glutamate-ammonia ligases	1.384	0.123	0.88279	1.38397e-06		Down for (3dpi-AtGAP1 overexpressor line C) / (3dpi-empty vector )
AT5G57460.1	unknown protein; FUNCTIONS IN: molecular_function unknown; INVOLVED IN: biological_process unknown; LOCATED IN: plasma membrane, chloroplast; EXPRESSED IN: 23 plant structures; EXPRESSED DURING: 13 growth stages; Has 166 Blast hits to 166 proteins in 41 species: Archae - 0; Bacteria - 0; Metazoa - 112; Fungi - 4; Plants - 36; Viruses - 0; Other Eukaryotes - 14 (source: NCBI BLink).	0.343	0.01	0.0348721	1.04324e-16		Down for (3dpi-AtGAP1 overexpressor line C) / (3dpi-empty vector )
AT2G44065.2	Ribosomal protein L2 family	0.969	0.01	0.963867	1.04324e-16		Down for (3dpi-AtGAP1 overexpressor line C) / (3dpi-empty vector )
AT3G19910.1	RING/U-box superfamily protein	1.02	0.01	0.991322	1.04324e-16		Down for (3dpi-AtGAP1 overexpressor line C) / (3dpi-empty vector )
AT4G16990.2	disease resistance protein (TIR-NBS class), putative	0.554	0.01	0.420832	1.04324e-16		Down for (3dpi-AtGAP1 overexpressor line C) / (3dpi-empty vector )
AT3G10740.1	alpha-L-arabinofuranosidase 1	1.124	0.01	0.989598	1.04324e-16		Down for (3dpi-AtGAP1 overexpressor line C) / (3dpi-empty vector )
AT4G18060.1	SH3 domain-containing protein	1.703	0.01	0.644017	1.04324e-16		Down for (3dpi-AtGAP1 overexpressor line C) / (3dpi-empty vector )
AT4G23650.1	calcium-dependent protein kinase 6	2.92	12.148	0.000287432	1.04324e-16		Up for (3dpi-AtGAP1 overexpressor line C) / (3dpi-empty vector )
AT3G44300.1	nitrilase 2	1.187	3.704	0.967173	0.000439242		Up for (3dpi-AtGAP1 overexpressor line C) / (3dpi-empty vector )
AT2G37550.2	ARF-GAP domain 7	2.296	3.125	0.0356949	0.00210388		Up for (3dpi-AtGAP1 overexpressor line C) / (3dpi-empty vector )
AT2G21390.1	Coatomer, alpha subunit	1.898	3.049	0.539838	0.0332341		Up for (3dpi-AtGAP1 overexpressor line C) / (3dpi-empty vector )
AT2G04842.1	threonyl-tRNA synthetase, putative / threonine--tRNA ligase, putative	0.01	4.342	1.15356e-16	0.00213063		Up for (3dpi-AtGAP1 overexpressor line C) / (3dpi-empty vector )
AT2G45540.2	WD-40 repeat family protein / beige-related	1	8.526	0.981196	7.93261e-07		Up for (3dpi-AtGAP1 overexpressor line C) / (3dpi-empty vector )
AT4G17050.1	ureidoglycine aminohydrolase	0.661	100	0.670678	1.04324e-16		Up for (3dpi-AtGAP1 overexpressor line C) / (3dpi-empty vector )
AT4G37925.1	subunit NDH-M of NAD(P)H:plastoquinone dehydrogenase complex	2.733	10.079	0.0983906	3.02436e-07		Up for (3dpi-AtGAP1 overexpressor line C) / (3dpi-empty vector )
AT1G64710.1	GroES-like zinc-binding dehydrogenase family protein	1.269	3.086	0.861918	0.00184282		Up for (3dpi-AtGAP1 overexpressor line C) / (3dpi-empty vector )
AT2G22360.1	DNAJ heat shock family protein		100		1.04324e-16		Up for (3dpi-AtGAP1 overexpressor line C) / (3dpi-empty vector )
AT2G27170.2	Structural maintenance of chromosomes (SMC) family protein	0.01	12.511	1.15356e-16	7.97578e-09		Up for (3dpi-AtGAP1 overexpressor line C) / (3dpi-empty vector )
AT3G63160.1	FUNCTIONS IN: molecular_function unknown; INVOLVED IN: biological_process unknown; LOCATED IN: chloroplast outer membrane, thylakoid, chloroplast thylakoid membrane, chloroplast, chloroplast envelope; EXPRESSED IN: 21 plant structures; EXPRESSED DURING: 13 growth stages; BEST Arabidopsis thaliana protein match is: outer envelope membrane protein 7 (TAIR:AT3G52420.1); Has 26 Blast hits to 26 prote…	100	100	1.15356e-16	1.04324e-16		Up for (3dpi-AtGAP1 overexpressor line C) / (3dpi-empty vector )
AT2G26280.1	CTC-interacting domain 7	100	100	1.15356e-16	1.04324e-16		Up for (3dpi-AtGAP1 overexpressor line C) / (3dpi-empty vector )
AT4G18930.1	RNA ligase/cyclic nucleotide phosphodiesterase family protein	0.238	9.053	0.0016599	4.32442e-07		Up for (3dpi-AtGAP1 overexpressor line C) / (3dpi-empty vector )
AT1G26750.1	unknown protein; Has 44 Blast hits to 44 proteins in 16 species: Archae - 0; Bacteria - 0; Metazoa - 0; Fungi - 0; Plants - 44; Viruses - 0; Other Eukaryotes - 0 (source: NCBI BLink).	100	100	1.15356e-16	1.04324e-16		Up for (3dpi-AtGAP1 overexpressor line C) / (3dpi-empty vector )
AT1G03090.2	methylcrotonyl-CoA carboxylase alpha chain, mitochondrial / 3-methylcrotonyl-CoA carboxylase 1 (MCCA)		100		1.04324e-16		Up for (3dpi-AtGAP1 overexpressor line C) / (3dpi-empty vector )
AT3G03630.1	cysteine synthase 26	2.827	3.072	0.0885845	0.0480907		Up for (3dpi-AtGAP1 overexpressor line C) / (3dpi-empty vector )
AT2G17840.1	Senescence/dehydration-associated protein-related	0.01	12.615	1.15356e-16	2.32871e-09		Up for (3dpi-AtGAP1 overexpressor line C) / (3dpi-empty vector )
AT1G43560.1	thioredoxin Y2	2.676	3.389	0.0549913	0.00519517		Up for (3dpi-AtGAP1 overexpressor line C) / (3dpi-empty vector )
AT5G16715.1	ATP binding;valine-tRNA ligases;aminoacyl-tRNA ligases;nucleotide binding;ATP binding;aminoacyl-tRNA ligases	1.315	10.56	0.905295	7.29172e-07		Up for (3dpi-AtGAP1 overexpressor line C) / (3dpi-empty vector )
AT1G66520.1	formyltransferase, putative	2.895	4.071	0.0730733	0.00802831		Up for (3dpi-AtGAP1 overexpressor line C) / (3dpi-empty vector )
AT5G47110.1	Chlorophyll A-B binding family protein	100	100	1.15356e-16	1.04324e-16		Up for (3dpi-AtGAP1 overexpressor line C) / (3dpi-empty vector )
AT3G13490.1	Lysyl-tRNA synthetase, class II		100		1.04324e-16		Up for (3dpi-AtGAP1 overexpressor line C) / (3dpi-empty vector )
AT5G44200.1	CAP-binding protein 20	0.01	100	1.15356e-16	1.04324e-16		Up for (3dpi-AtGAP1 overexpressor line C) / (3dpi-empty vector )
AT1G21660.1	Chaperone DnaJ-domain superfamily protein		100		1.04324e-16		Up for (3dpi-AtGAP1 overexpressor line C) / (3dpi-empty vector )

## Sheet: Primer used
Table S6. Primers used in this study.
Primer name	Primer sequence (5’ – 3’)	Annealing temperature (°C)
Forward primer for AtGAP1 expression analysis by RT-qPCR	ACGATCTCTTGGGCCTCCTT	58
Reverse primer for AtGAP1 expression analysis by RT-qPCR	TGTTTGCCCATCTTGACGAC
Forward primer for PR1 expression analysis by RT-qPCR	AACTACAACTACGCTGCGAACAC	55
Reverse primer for PR1 expression analysis by RT-qPCR	CTTCTCGTTCACATAATTCCCAC
Forward primer for ACT7 expression analysis by RT-qPCR (Czechowski et al., 2005)	AGCACCTTCCAACAGATGTGGA	55
Reverse primer for ACT7 expression analysis by RT-qPCR (Czechowski et al., 2005)	ATAAGACAAGACACACTTAGAAGCA
